# Supplementary material for: Phylogenetic Analyses and GAGA-Motif Binding Studies of BBR/BPC Proteins Lend to Clues in GAGA-Motif Recognition and a Regulatory Role in Brassinosteroid Signaling
Source: Front Plant Sci. 2019 Apr 16;10:466. doi: 10.3389/fpls.2019.00466 (PMC6477699; doi:10.3389/fpls.2019.00466)
Supplement: TABLE S7 — Genes responsive after phytohormone treatment. [file Table_7.XLSX]

## Sheet: BL responses
Table S7. Genes responsive after phytohormone treatment
regulated all BL
Affy ID	AGI	Description
267614_AT	AT2G26710	cytochrome P450, putative
267546_AT	AT2G32680	disease resistance family protein
267389_AT	AT2G44460	glycosyl hydrolase family 1 protein
267361_AT	AT2G39920	acid phosphatase class B family protein
267317_AT	AT2G34700	pollen Ole e 1 allergen and extensin family protein
267207_AT	AT2G30840	2-oxoglutarate-dependent dioxygenase, putative
267198_AT	AT2G30810	gibberellin-regulated family protein
267117_AT	AT2G32570	unknown protein
267107_AT	AT2G14730	hypothetical protein
267075_AT	AT2G41070	basic leucine zipper transcription factor (BZIP12)
267074_S_AT	AT2G40955	hypothetical protein
266996_AT	AT2G34490	cytochrome P450 family protein
266908_AT	AT2G34650	protein kinase PINOID (PID)
266830_AT	AT2G22810	1-aminocyclopropane-1-carboxylate synthase 4 / ACC synthase 4 (ACS4)
266765_AT	AT2G46860	inorganic pyrophosphatase, putative (soluble) / pyrophosphate phospho-hydrolase, putative / PPase, putative
266711_AT	AT2G46740	FAD-binding domain-containing protein
266693_AT	AT2G19800	expressed protein
266692_AT	AT2G19960	hAT dimerisation domain-containing protein / transposase-related
266661_AT	AT2G25820	transcription factor, putative
266658_AT	AT2G25735	expressed protein
266531_AT	AT2G16835	water channel protein, putative
266498_AT	AT2G06960	oxidoreductase, 2OG-Fe(II) oxygenase family protein
266385_AT	AT2G14610	pathogenesis-related protein 1 (PR-1)
266368_AT	AT2G41380	embryo-abundant protein-related
266251_S_AT	AT2G27540	expressed protein
266250_AT	AT2G27870	hypothetical protein
266246_AT	AT2G27690	cytochrome P450, putative
266132_AT	AT2G45130	SPX (SYG1/Pho81/XPR1) domain-containing protein
266124_AT	AT2G45080	cyclin family protein
266115_AT	AT2G02140	plant defensin-fusion protein, putative (PDF2.6)
266054_AT	AT2G40640	expressed protein
265938_AT	AT2G19620	Ndr family protein
265877_AT	AT2G42380	bZIP transcription factor family protein
265837_AT	AT2G14560	expressed protein
265833_AT	AT2G14420	Mutator-like transposase family
265817_AT	AT2G18050	histone H1-3 (HIS1-3)
265806_AT	AT2G18010	auxin-responsive family protein
265772_AT	AT2G48010	serine/threonine protein kinase (RFK3)
265757_X_AT	AT2G13160	CACTA-like transposase family (Ptta/En/Spm)
265754_X_AT	AT2G10640	CACTA-like transposase family (Ptta/En/Spm)
265723_AT	AT2G32140	disease resistance protein (TIR class), putative
265654_S_AT	AT2G13870	CACTA-like transposase family (Ptta/En/Spm)
265539_AT	AT2G15830	expressed protein
265536_AT	AT2G15880	leucine-rich repeat family protein / extensin family protein
265490_S_AT	AT2G15470	glycoside hydrolase family 28 protein / polygalacturonase (pectinase) family protein
265409_AT	AT2G16830	pseudogene, hypothetical protein
265294_AT	AT2G14030	Mutator-like transposase family
265279_AT	AT2G28460	DC1 domain-containing protein
265114_AT	AT1G62440	leucine-rich repeat family protein / extensin family protein
265113_AT	AT1G62460	copia-like retrotransposon family
265081_AT	AT1G03840	zinc finger (C2H2 type) family protein
265024_AT	AT1G24600	expressed protein
264879_AT	AT1G61260	expressed protein
264846_AT	AT2G17850	senescence-associated family protein
264788_AT	AT2G17880	DNAJ heat shock protein, putative
264765_AT	AT1G61430	S-locus protein kinase, putative
264430_AT	AT1G61680	terpene synthase/cyclase family protein
264231_AT	AT1G67450	F-box family protein
264157_AT	AT1G65310	xyloglucan
264058_AT	AT2G03560	F-box family protein (FBX7)
263968_S_AT	AT2G12980	CACTA-like transposase family (Ptta/En/Spm)
263947_AT	AT2G35820	expressed protein
263944_AT	AT2G36040	expressed protein
263931_AT	AT2G36220	expressed protein
263858_AT	AT2G04370	hypothetical protein
263708_AT	AT1G09320	agenet domain-containing protein
263682_AT	AT1G26860	hypothetical protein
263675_X_AT	AT2G04770	CACTA-like transposase family (Ptta/En/Spm)
263616_AT	AT2G04680	DC1 domain-containing protein
263584_AT	AT2G17040	no apical meristem (NAM) family protein
263544_AT	AT2G21590	glucose-1-phosphate adenylyltransferase large subunit, putative / ADP-glucose pyrophosphorylase, putative
263479_X_AT	AT2G04000	expressed protein
263475_AT	AT2G31945	expressed protein
263467_AT	AT2G31730	ethylene-responsive protein, putative
263465_AT	AT2G31940	expressed protein
263391_AT	AT2G11810	1,2-diacylglycerol 3-beta-galactosyltransferase, putative / monogalactosyldiacylglycerol synthase, putative / MGDG synthase, putative
263357_S_AT	AT2G15150	Mutator-like transposase family
263313_AT	AT2G10450	14-3-3 protein, putative / grf15, putative
263229_S_AT	AT1G05650	polygalacturonase, putative / pectinase, putative
263213_AT	AT1G30560	transporter, putative
263207_AT	AT1G10550	xyloglucan
263182_AT	AT1G05575	expressed protein
263139_AT	AT1G65110	ubiquitin carboxyl-terminal hydrolase-related
263075_AT	AT2G17570	undecaprenyl pyrophosphate synthetase family protein / UPP synthetase family protein
263061_AT	AT2G18190	AAA-type ATPase family protein
263002_AT	AT1G54200	expressed protein
262918_AT	AT1G65000	expressed protein
262915_AT	AT1G59940	two-component responsive regulator / response regulator 3 (ARR3)
262866_AT	AT1G64940	cytochrome P450, putative
262831_AT	AT1G14730	cytochrome B561 family
262755_AT	AT1G16360	LEM3 (ligand-effect modulator 3) family protein / CDC50 family protein
262698_AT	AT1G75960	AMP-binding protein, putative
262635_AT	AT1G06570	4-hydroxyphenylpyruvate dioxygenase (HPD)
262608_AT	AT1G14120	2-oxoglutarate-dependent dioxygenase, putative
262505_AT	AT1G21680	expressed protein
262363_AT	AT1G72850	disease resistance protein (TIR-NBS class), putative
262259_S_AT	AT1G53870	expressed protein
262228_AT	AT1G68690	pseudogene, protein kinase family
262118_AT	AT1G02850	glycosyl hydrolase family 1 protein
262030_S_AT	AT1G37170	Mutator-like transposase family
261980_AT	AT1G33820	hypothetical protein
261691_AT	AT1G50060	pathogenesis-related protein, putative
261657_AT	AT1G50050	pathogenesis-related protein, putative
261648_AT	AT1G27730	zinc finger (C2H2 type) family protein (ZAT10) / salt-tolerance zinc finger protein (STZ)
261585_AT	AT1G01010	no apical meristem (NAM) family protein
261571_AT	AT1G01150	expressed protein
261435_AT	AT1G07620	GTP1/OBG family protein
261292_AT	AT1G36940	hypothetical protein
261283_S_AT	AT1G35770	Ulp1 protease family protein
261191_AT	AT1G32900	starch synthase, putative
261100_AT	AT1G63020	DNA-directed RNA polymerase alpha subunit family protein
260942_S_AT	AT1G45190	expressed protein
260933_AT	AT1G02470	expressed protein
260915_AT	AT1G02660	lipase class 3 family protein
260875_AT	AT1G21410	F-box family protein
260803_AT	AT1G78340	glutathione S-transferase, putative
260744_AT	AT1G15010	expressed protein
260741_AT	AT1G15045	hypothetical protein contains Pfam profile: PF00117 Glutamine amidotransferase class-I
260668_AT	AT1G19530	expressed protein
260597_AT	AT1G55915	expressed protein
260359_AT	AT1G69210	expressed protein
260256_AT	AT1G74350	intron maturase, type II family protein
260247_AT	AT1G74200	leucine-rich repeat family protein
260197_AT	AT1G67623	F-box family protein
260097_AT	AT1G73220	sugar transporter family protein
260068_AT	AT1G73805	calmodulin-binding protein
259977_AT	AT1G76590	zinc-binding family protein
259917_AT	AT1G72580	hypothetical protein
259848_AT	AT1G72180	leucine-rich repeat transmembrane protein kinase, putative
259839_AT	AT1G52190	proton-dependent oligopeptide transport (POT) family protein
259834_AT	AT1G69570	Dof-type zinc finger domain-containing protein
259793_AT	AT1G64380	AP2 domain-containing transcription factor, putative
259790_S_AT	AT1G29430	auxin-responsive family protein
259787_AT	AT1G29460	auxin-responsive protein, putative
259784_AT	AT1G29450	auxin-responsive protein, putative
259751_AT	AT1G71030	myb family transcription factor
259705_AT	AT1G77450	no apical meristem (NAM) family protein
259681_AT	AT1G77760	nitrate reductase 1 (NR1)
259679_AT	AT1G77720	protein kinase family protein
259635_AT	AT1G56360	calcineurin-like phosphoesterase family protein
259537_AT	AT1G12370	type II CPD photolyase PHR1 (PHR1)
259453_AT	AT1G44090	gibberellin 20-oxidase family protein
259432_AT	AT1G01520	myb family transcription factor
259426_AT	AT1G01470	late embryogenesis abundant protein, putative / LEA protein, putative
259418_AT	AT1G02390	phospholipid/glycerol acyltransferase family protein
259399_AT	AT1G17710	expressed protein
259389_AT	AT1G06320	hypothetical protein
259385_AT	AT1G13470	expressed protein
259332_AT	AT3G03830	auxin-responsive protein, putative
259331_AT	AT3G03840	auxin-responsive protein, putative
259221_S_AT	AT3G03540	phosphoesterase family protein
259217_AT	AT3G03620	MATE efflux family protein
259042_AT	AT3G03450	gibberellin response modulator, putative / gibberellin-responsive modulator, putative
258982_AT	AT3G08870	lectin protein kinase, putative
258939_AT	AT3G10020	expressed protein
258887_AT	AT3G05630	phospholipase D, putative (PLDP2)
258742_AT	AT3G05800	expressed protein
258586_S_AT	AT3G04320	trypsin and protease inhibitor family protein / Kunitz family protein
258561_AT	AT3G05960	sugar transporter, putative
258465_AT	AT3G17220	invertase/pectin methylesterase inhibitor family protein
258422_AT	AT3G16710	pentatricopeptide (PPR) repeat-containing protein
258414_AT	AT3G17380	meprin and TRAF homology domain-containing protein / MATH domain-containing protein
258367_AT	AT3G14370	protein kinase family protein
258337_AT	AT3G16040	expressed protein
258252_AT	AT3G15720	glycoside hydrolase family 28 protein / polygalacturonase (pectinase) family protein
258204_AT	AT3G13960	expressed protein
258117_AT	AT3G14700	expressed protein
258100_AT	AT3G23550	MATE efflux family protein
257925_AT	AT3G23170	expressed protein
257793_AT	AT3G26960	expressed protein
257763_S_AT	AT3G23110	disease resistance family protein
257689_AT	AT3G12820	myb family transcription factor (MYB10)
257672_AT	AT3G20300	expressed protein
257604_S_AT	AT3G13830	F-box family protein
257563_AT	AT3G19610	hypothetical protein
257483_AT	AT1G49620	kip-related protein 7 (KRP7) / cyclin-dependent kinase inhibitor 7 (ICK7)
257442_AT	AT2G28680	cupin family protein
257208_AT	AT3G14910	expressed protein
257028_AT	AT3G19230	leucine-rich repeat family protein
256887_AT	AT3G15150	expressed protein
256872_AT	AT3G26490	phototropic-responsive NPH3 family protein
256748_X_AT	AT3G30396	CACTA-like transposase family (Ptta/En/Spm)
256687_X_AT	AT3G32120	hypothetical protein
256633_AT	AT3G28340	galactinol synthase, putative
256603_AT	AT3G28270	expressed protein
256598_AT	AT3G30180	cytochrome P450, putative
256593_AT	AT3G28510	AAA-type ATPase family protein
256589_AT	AT3G28740	cytochrome P450 family protein
256554_AT	AT3G31380	copia-like retrotransposon family
256526_AT	AT1G66090	disease resistance protein (TIR-NBS class), putative
256407_AT	AT1G66570	sucrose transporter, putative / sucrose-proton symporter, putative
256356_S_AT	AT1G66500	zinc finger (C2H2-type) family protein
256340_AT	AT1G72070	DNAJ heat shock N-terminal domain-containing protein
256335_AT	AT1G72110	expressed protein
256315_AT	AT1G35880	hypothetical protein
256289_S_AT	AT3G12230	serine carboxypeptidase S10 family protein
256283_AT	AT3G12540	expressed protein
256139_AT	AT1G48660	auxin-responsive GH3 family protein
256108_AT	AT1G16940	F-box family protein
256062_AT	AT1G07090	expressed protein
255796_AT	AT2G33290	SET domain-containing protein (SUVH2)
255654_AT	AT4G00970	protein kinase family protein
255604_AT	AT4G01080	expressed protein
255549_AT	AT4G01950	phospholipid/glycerol acyltransferase family protein
255538_AT	AT4G01680	myb family transcription factor (MYB55)
255524_AT	AT4G02330	pectinesterase family protein
255481_AT	AT4G02460	DNA mismatch repair protein, putative
255403_AT	AT4G03400	auxin-responsive GH3 family protein
255347_AT	AT4G03810	copia-like retrotransposon family
255345_AT	AT4G04460	aspartyl protease family protein
255202_AT	AT4G07500	hypothetical protein
255157_AT	AT4G07790	hypothetical protein
255122_AT	AT4G08490	gypsy-like retrotransposon family (Athila)
255119_AT	AT4G08880	Ulp1 protease family protein
255064_AT	AT4G08950	phosphate-responsive protein, putative (EXO)
254975_AT	AT4G10500	oxidoreductase, 2OG-Fe(II) oxygenase family protein
254943_AT	AT4G10890	expressed protein
254646_AT	AT4G18530	expressed protein
254644_AT	AT4G18510	Clavata3 / ESR-Related-2 (CLE2)
254497_AT	AT4G20080	C2 domain-containing protein
254305_AT	AT4G22200	potassium channel protein 2 (AKT2) (AKT3)
254271_AT	AT4G23150	protein kinase family protein
254265_S_AT	AT4G23140	receptor-like protein kinase 5 (RLK5)
254255_AT	AT4G23220	protein kinase family protein
254231_AT	AT4G23810	WRKY family transcription factor
254229_AT	AT4G23610	expressed protein
254111_AT	AT4G24890	calcineurin-like phosphoesterase family protein
254097_AT	AT4G25160	protein kinase family protein
254042_AT	AT4G25810	xyloglucan
253971_AT	AT4G26530	fructose-bisphosphate aldolase, putative
253910_AT	AT4G27290	S-locus protein kinase, putative
253908_AT	AT4G27260	auxin-responsive GH3 family protein
253907_AT	AT4G27250	dihydroflavonol 4-reductase family / dihydrokaempferol 4-reductase family
253732_AT	AT4G29140	MATE efflux protein-related
253608_AT	AT4G30290	xyloglucan
253571_AT	AT4G31000	calmodulin-binding protein
253485_AT	AT4G31800	WRKY family transcription factor
253423_AT	AT4G32280	auxin-responsive AUX/IAA family protein
253408_AT	AT4G32950	protein phosphatase 2C, putative / PP2C, putative
253123_AT	AT4G36000	pathogenesis-related thaumatin family protein
253103_AT	AT4G36110	auxin-responsive protein, putative
253077_AT	AT4G36170	hypothetical protein
253050_AT	AT4G37450	arabinogalactan-protein (AGP18)
253048_AT	AT4G37560	formamidase, putative / formamide amidohydrolase, putative
253043_AT	AT4G37540	LOB domain protein 39 / lateral organ boundaries domain protein 39 (LBD39)
252970_AT	AT4G38850	auxin-responsive protein / small auxin up RNA (SAUR-AC1)
252890_AT	AT4G39400	brassinosteroid insensitive 1 (BRI1)
252863_AT	AT4G39800	inositol-3-phosphate synthase isozyme 1 / myo-inositol-1-phosphate synthase 1 / MI-1-P synthase 1 / IPS 1
252775_S_AT	AT3G42930	CACTA-like transposase family (Ptta/En/Spm)
252756_S_AT	AT3G43550	GDSL-motif lipase, putative
252736_AT	AT3G43210	kinesin motor family protein (NACK2)
252729_AT	AT3G43100	hypothetical protein
252668_AT	AT3G44210	hypothetical protein
252636_AT	AT3G44520	esterase/lipase/thioesterase family protein
252598_AT	AT3G45380	hypothetical protein
252579_AT	AT3G45510	zinc finger (C3HC4-type RING finger) family protein
252563_AT	AT3G45970	expansin family protein (EXPL1)
252520_AT	AT3G46370	leucine-rich repeat protein kinase, putative
252435_AT	AT3G47320	hypothetical protein
252387_AT	AT3G47800	aldose 1-epimerase family protein
252380_AT	AT3G47740	ABC transporter family protein
252367_AT	AT3G48360	speckle-type POZ protein-related
252320_AT	AT3G48580	xyloglucan
252299_AT	AT3G49150	F-box family protein
252265_AT	AT3G49620	2-oxoacid-dependent oxidase, putative (DIN11)
252184_AT	AT3G50660	steroid 22-alpha-hydroxylase (CYP90B1) (DWF4)
252178_AT	AT3G50750	brassinosteroid signalling positive regulator-related
252167_AT	AT3G50560	short-chain dehydrogenase/reductase (SDR) family protein
252160_AT	AT3G50570	hydroxyproline-rich glycoprotein family protein
252136_AT	AT3G50770	calmodulin-related protein, putative
252063_AT	AT3G51590	lipid transfer protein, putative
251977_AT	AT3G53250	auxin-responsive family protein
251922_AT	AT3G54030	protein kinase family protein
251884_AT	AT3G54150	embryo-abundant protein-related
251844_AT	AT3G54630	expressed protein
251785_AT	AT3G55130	ABC transporter family protein
251698_AT	AT3G56610	expressed protein
251677_AT	AT3G56980	basic helix-loop-helix (bHLH) family protein
251633_AT	AT3G57460	expressed protein
251623_AT	AT3G57390	MADS-box protein (AGL18)
251321_AT	AT3G61460	zinc finger (C3HC4-type RING finger) family protein (BRH1)
251262_AT	AT3G62080	SNF7 family protein
251231_AT	AT3G62760	glutathione S-transferase, putative
251188_AT	AT3G62730	expressed protein
251160_AT	AT3G63240	endonuclease/exonuclease/phosphatase family protein
251154_AT	AT3G63110	adenylate isopentenyltransferase 3 / cytokinin synthase (IPT3)
251072_AT	AT5G01740	expressed protein
251061_AT	AT5G01830	armadillo/beta-catenin repeat family protein / U-box domain-containing protein
251045_S_AT	AT5G02360	DC1 domain-containing protein
251013_AT	AT5G02540	short-chain dehydrogenase/reductase (SDR) family protein
250907_AT	AT5G03670	expressed protein
250781_AT	AT5G05410	DRE-binding protein (DREB2A)
250752_AT	AT5G05690	cytochrome P450 90A1 (CYP90A1) (CYP90) (CPD)
250680_AT	AT5G06570	expressed protein
250588_AT	AT5G07660	structural maintenance of chromosomes (SMC) family protein
250537_AT	AT5G08565	expressed protein
250464_AT	AT5G10040	expressed protein
250426_AT	AT5G10510	ovule development protein, putative
250414_AT	AT5G11180	glutamate receptor family protein (GLR2.6)
250327_AT	AT5G12050	expressed protein
250292_AT	AT5G13220	expressed protein
250196_AT	AT5G14580	polyribonucleotide nucleotidyltransferase, putative
250173_AT	AT5G14340	myb family transcription factor (MYB40)
250167_AT	AT5G15310	myb family transcription factor
250142_AT	AT5G14650	polygalacturonase, putative / pectinase, putative
250091_AT	AT5G17340	expressed protein
250068_AT	AT5G17960	DC1 domain-containing protein
249961_AT	AT5G18770	F-box family protein
249902_AT	AT5G22680	hypothetical protein
249890_AT	AT5G22570	WRKY family transcription factor
249868_AT	AT5G23030	senescence-associated family protein
249780_AT	AT5G24240	phosphatidylinositol 3- and 4-kinase family protein / ubiquitin family protein
249699_AT	AT5G35540	hypothetical protein
249667_AT	AT5G35850	unknown protein
249642_AT	AT5G36960	expressed protein
249626_AT	AT5G37540	aspartyl protease family protein
249532_AT	AT5G38780	S-adenosyl-L-methionine
249418_AT	AT5G39780	'putative protein predicted protein, Arabidopsis thaliana'
249410_AT	AT5G40380	protein kinase family protein
249278_AT	AT5G41900	hydrolase, alpha/beta fold family protein
249186_AT	AT5G43040	DC1 domain-containing protein
249104_AT	AT5G43610	sucrose transporter-related / sucrose-proton symporter-related
249056_AT	AT5G44470	hypothetical protein
249008_AT	AT5G44680	methyladenine glycosylase family protein
248978_AT	AT5G45070	disease resistance protein (TIR class), putative
248964_AT	AT5G45340	cytochrome P450 family protein
248912_AT	AT5G45670	GDSL-motif lipase/hydrolase family protein
248888_AT	AT5G46240	inward rectifying potassium channel (KAT1)
248855_AT	AT5G46590	no apical meristem (NAM) family protein
248812_AT	AT5G47330	palmitoyl protein thioesterase family protein
248623_AT	AT5G49170	expressed protein
248617_AT	AT5G49590	hypothetical protein
248509_AT	AT5G50335	expressed protein
248460_AT	AT5G50915	basic helix-loop-helix (bHLH) family protein
248448_AT	AT5G51190	AP2 domain-containing transcription factor, putative
248322_AT	AT5G52760	heavy-metal-associated domain-containing protein
248246_AT	AT5G53200	myb family transcription factor (TRIPTYCHON)
248213_AT	AT5G53660	expressed protein
248208_AT	AT5G53980	homeobox-leucine zipper family protein
248169_AT	AT5G54610	ankyrin repeat family protein
248110_AT	AT5G55320	membrane bound O-acyl transferase (MBOAT) family protein / wax synthase-related
247925_AT	AT5G57560	xyloglucan
247882_AT	AT5G57785	expressed protein
247880_AT	AT5G57780	expressed protein
247774_AT	AT5G58660	oxidoreductase, 2OG-Fe(II) oxygenase family protein
247754_AT	AT5G59080	expressed protein
247655_AT	AT5G59820	zinc finger (C2H2 type) family protein (ZAT12)
247582_AT	AT5G60760	2-phosphoglycerate kinase-related
247478_AT	AT5G62360	invertase/pectin methylesterase inhibitor family protein
247351_AT	AT5G63790	no apical meristem (NAM) family protein
247282_AT	AT5G64240	latex-abundant family protein (AMC3) / caspase family protein
247255_AT	AT5G64780	expressed protein
247252_AT	AT5G64770	expressed protein
247191_AT	AT5G65310	homeobox-leucine zipper protein 5 (HB-5) / HD-ZIP transcription factor 5
247189_AT	AT5G65390	arabinogalactan-protein (AGP7)
247159_AT	AT5G65800	1-aminocyclopropane-1-carboxylate synthase, putative / ACC synthase, putative
247103_AT	AT5G66610	LIM domain-containing protein
247024_AT	AT5G66985	expressed protein
246932_AT	AT5G25190	ethylene-responsive element-binding protein, putative
246927_S_AT	AT5G25260	expressed protein
246903_AT	AT5G25750	hypothetical protein
246884_AT	AT5G26220	ChaC-like family protein
246869_AT	AT5G26020	hypothetical protein
246854_AT	AT5G26200	mitochondrial substrate carrier family protein
246821_AT	AT5G26920	calmodulin-binding protein
246813_AT	AT5G27190	Mutator-like transposase family
246657_AT	AT5G35250	hypothetical protein
246625_AT	AT1G48880	hypothetical protein
246430_AT	AT5G17470	calmodulin-related protein, putative
246406_AT	AT1G57650	disease resistance protein (NBS-LRR class), putative
246394_AT	AT1G58160	jacalin lectin family protein
246369_AT	AT1G51910	protein kinase family protein
246284_AT	AT4G36780	brassinosteroid signalling positive regulator-related
246273_AT	AT4G36700	cupin family protein
246216_AT	AT4G36380	cytochrome P450 90C1 (CYP90C1) / rotundifolia3 (ROT3)
246200_AT	AT4G37240	expressed protein
246151_AT	AT5G19950	expressed protein
245920_AT	AT5G28790	hypothetical protein
245840_AT	AT1G58420	expressed protein
245784_AT	AT1G32190	expressed protein
245761_AT	AT1G66890	expressed protein
245757_AT	AT1G35140	phosphate-responsive protein, putative
245753_AT	AT1G35143	hypothetical protein
245735_AT	AT1G73410	myb family transcription factor (MYB54)
245696_AT	AT5G04190	phytochrome kinase substrate-related
245689_AT	AT5G04120	phosphoglycerate/bisphosphoglycerate mutase family protein
245658_AT	AT1G28270	rapid alkalinization factor (RALF) family protein
245609_AT	AT4G14370	disease resistance protein (TIR-NBS-LRR class), putative
245439_AT	AT4G16670	expressed protein
245371_AT	AT4G15750	invertase/pectin methylesterase inhibitor family protein
245362_AT	AT4G17460	homeobox-leucine zipper protein 1 (HAT1) / HD-ZIP protein 1
245329_AT	AT4G14365	zinc finger (C3HC4-type RING finger) family protein / ankyrin repeat family protein
245276_AT	AT4G16780	homeobox-leucine zipper protein 4 (HAT4) / HD-ZIP protein 4
245257_AT	AT4G14640	calmodulin-8 (CAM8)
245226_AT	AT3G29970	germination protein-related
245174_AT	AT2G47500	kinesin motor protein-related
245079_AT	AT2G23330	copia-like retrotransposon family
245041_AT	AT2G26530	expressed protein

## Sheet: SA responses
SA all 3 fold
Affy ID	AGI	Description
251410_AT	AT3G60280	uclacyanin 3 (UCC3)
245151_AT	AT2G47550	pectinesterase family protein
254326_AT	AT4G22610	protease inhibitor/seed storage/lipid transfer protein (LTP) family protein
254564_AT	AT4G19170	9-cis-epoxycarotenoid dioxygenase, putative / neoxanthin cleavage enzyme, putative / carotenoid cleavage dioxygenase, putative
247914_AT	AT5G57540	xyloglucan
253301_AT	AT4G33720	pathogenesis-related protein, putative
250376_AT	AT5G11550	expressed protein
264253_AT	AT1G09170	kinesin motor protein-related
246526_AT	AT5G15720	GDSL-motif lipase/hydrolase family protein
256101_AT	AT1G13760	hypothetical protein
254836_AT	AT4G12330	cytochrome P450 family protein
263376_AT	AT2G20520	fasciclin-like arabinogalactan-protein (FLA6)
249934_AT	AT5G22410	peroxidase, putative
249203_AT	AT5G42590	cytochrome P450 71A16, putative (CYP71A16)
246229_AT	AT4G37160	multi-copper oxidase type I family protein
248324_AT	AT5G52790	CBS domain-containing protein-related
256670_AT	AT3G32220	gypsy-like retrotransposon family (Athila)
251977_AT	AT3G53250	auxin-responsive family protein
246643_S_AT	AT5G34990	pseudogene, Ulp1 protease family
249868_AT	AT5G23030	senescence-associated family protein
253763_AT	AT4G28850	xyloglucan
258832_AT	AT3G07070	protein kinase family protein
249522_AT	AT5G38700	expressed protein
258473_S_AT	AT3G02610	acyl-(acyl-carrier-protein) desaturase, putative / stearoyl-ACP desaturase, putative
256096_AT	AT1G13650	expressed protein
264931_AT	AT1G60590	polygalacturonase, putative / pectinase, putative
249517_AT	AT5G38580	hypothetical protein
252415_AT	AT3G47340	asparagine synthetase 1 (glutamine-hydrolyzing) / glutamine-dependent asparagine synthetase 1 (ASN1)
266765_AT	AT2G46860	inorganic pyrophosphatase, putative (soluble) / pyrophosphate phospho-hydrolase, putative / PPase, putative
256736_AT	AT3G29410	terpene synthase/cyclase family protein
254024_AT	AT4G25780	pathogenesis-related protein, putative
259846_AT	AT1G72140	proton-dependent oligopeptide transport (POT) family protein
245689_AT	AT5G04120	phosphoglycerate/bisphosphoglycerate mutase family protein
248790_AT	AT5G47450	major intrinsic family protein / MIP family protein
253569_AT	AT4G31250	leucine-rich repeat transmembrane protein kinase, putative
250446_AT	AT5G10770	chloroplast nucleoid DNA-binding protein, putative
247871_AT	AT5G57530	xyloglucan
261541_AT	AT1G63600	protein kinase-related
253353_AT	AT4G33730	pathogenesis-related protein, putative
254338_S_AT	AT4G22080	pectate lyase family protein
262226_AT	AT1G53885	senescence-associated protein-related
261459_AT	AT1G21100	O-methyltransferase, putative
256352_AT	AT1G54970	proline-rich family protein
263970_AT	AT2G42850	cytochrome P450 family protein
255934_AT	AT1G12740	cytochrome P450 family protein
266308_AT	AT2G27010	cytochrome P450 family protein
258035_AT	AT3G21180	calcium-transporting ATPase, plasma membrane-type, putative / Ca2+-ATPase, putative (ACA9)
247536_AT	AT5G61650	cyclin family protein
261157_AT	AT1G34510	peroxidase, putative
252004_AT	AT3G52780	purple acid phosphatase (PAP20)
248636_AT	AT5G49080	proline-rich extensin-like family protein
247162_AT	AT5G65730	xyloglucan
265053_AT	AT1G52000	jacalin lectin family protein
252382_AT	AT3G47770	ABC transporter family protein
247778_AT	AT5G58750	wound-responsive protein-related
250081_AT	AT5G17180	hypothetical protein
253315_AT	AT4G33900	kelch repeat-containing F-box family protein
250801_AT	AT5G04960	pectinesterase family protein
264898_AT	AT1G23205	invertase/pectin methylesterase inhibitor family protein
249348_AT	AT5G40860	hypothetical protein
262105_AT	AT1G02810	pectinesterase family protein
257378_S_AT	AT2G02290	NLI interacting factor (NIF) family protein
255139_S_AT	AT4G08400	proline-rich extensin-like family protein
267128_AT	AT2G23620	esterase, putative
263458_AT	AT2G22290	Ras-related GTP-binding protein, putative
259525_AT	AT1G12560	expansin, putative (EXP7)
249205_AT	AT5G42600	pentacyclic triterpene synthase, putative
250870_AT	AT5G03920	expressed protein
253123_AT	AT4G36000	pathogenesis-related thaumatin family protein
252238_AT	AT3G49960	peroxidase, putative
253608_AT	AT4G30290	xyloglucan
265766_AT	AT2G48080	oxidoreductase, 2OG-Fe(II) oxygenase family protein
263300_AT	AT2G11560	Mutator-like transposase similar to MURA transposase of maize Mutator transposon
248725_AT	AT5G47980	transferase family protein
249756_AT	AT5G24313	expressed protein
260920_AT	AT1G21530	AMP-binding protein, putative
250778_AT	AT5G05500	pollen Ole e 1 allergen and extensin family protein
263316_S_AT	AT2G24710	glutamate receptor family protein (GLR2.3)
249696_AT	AT5G35820	copia-like retrotransposon family
254534_AT	AT4G19680	iron-responsive transporter (IRT2)
257491_AT	AT1G06170	basic helix-loop-helix (bHLH) family protein
245967_AT	AT5G19800	hydroxyproline-rich glycoprotein family protein
245452_AT	AT4G16910	gypsy-like retrotransposon family
264567_S_AT	AT1G05250	peroxidase, putative
248622_AT	AT5G49360	glycosyl hydrolase family 3 protein
261066_AT	AT1G07490	expressed protein
256600_AT	AT3G14850	expressed protein
253556_AT	AT4G31100	wall-associated kinase, putative
260770_AT	AT1G49200	zinc finger (C3HC4-type RING finger) family protein
259004_AT	AT3G01840	protein kinase family protein
257300_AT	AT3G28080	nodulin MtN21 family protein
255051_AT	AT4G09710	non-LTR retrotransposon family (LINE)
254096_AT	AT4G25150	acid phosphatase, putative
261099_AT	AT1G62980	expansin, putative (EXP18)
250479_AT	AT5G10260	Ras-related GTP-binding protein, putative
254644_AT	AT4G18510	Clavata3 / ESR-Related-2 (CLE2)
250678_AT	AT5G06540	pentatricopeptide (PPR) repeat-containing protein
264029_AT	AT2G03720	universal stress protein (USP) family protein
259064_AT	AT3G07490	calcium-binding protein, putative
254333_AT	AT4G22753	sterol desaturase family protein
256569_AT	AT3G19550	expressed protein
258765_AT	AT3G10710	pectinesterase family protein
246512_AT	AT5G15630	phytochelatin synthetase family protein / COBRA cell expansion protein COBL4
257747_AT	AT3G18700	hypothetical protein
263789_AT	AT2G24560	GDSL-motif lipase/hydrolase family protein
258530_AT	AT3G06840	expressed protein
248998_AT	AT5G45320	expressed protein
265091_S_AT	AT1G03495	pseudogene, transferase family
261199_AT	AT1G12950	MATE efflux family protein
248118_AT	AT5G55050	GDSL-motif lipase/hydrolase family protein
247360_AT	AT5G63450	cytochrome P450, putative
261468_S_AT	AT1G28500	hypothetical protein
249971_AT	AT5G19110	extracellular dermal glycoprotein-related / EDGP-related
250874_AT	AT5G04010	expressed protein
264051_AT	AT2G22340	hypothetical protein
249699_AT	AT5G35540	hypothetical protein
260553_AT	AT2G41800	expressed protein
260668_AT	AT1G19530	expressed protein
248976_AT	AT5G44930	exostosin family protein
264216_AT	AT1G60180	hypothetical protein
259479_AT	AT1G19020	expressed protein
245548_AT	AT4G15310	cytochrome P450-related
248280_AT	AT5G52950	expressed protein
246042_AT	AT5G19440	cinnamyl-alcohol dehydrogenase, putative (CAD)
262671_AT	AT1G76040	calcium-dependent protein kinase, putative / CDPK, putative
258606_AT	AT3G02840	immediate-early fungal elicitor family protein
262530_AT	AT1G17240	leucine-rich repeat family protein
246600_AT	AT5G14930	leaf senescence-associated protein (SAG101)
248332_AT	AT5G52640	heat shock protein 81-1 (HSP81-1) / heat shock protein 83 (HSP83)
260206_AT	AT1G70740	protein kinase family protein
261618_AT	AT1G33110	MATE efflux family protein
254587_AT	AT4G19520	disease resistance protein (TIR-NBS-LRR class), putative
263928_AT	AT2G36330	integral membrane protein, putative
259489_AT	AT1G15790	expressed protein
264106_AT	AT2G13780	unknown protein
262317_AT	AT2G48140	protease inhibitor/seed storage/lipid transfer protein (LTP) family protein
261598_AT	AT1G49750	leucine-rich repeat family protein
254592_AT	AT4G18880	heat shock transcription factor 21 (HSF21)
246055_AT	AT5G08380	alpha-galactosidase, putative / melibiase, putative / alpha-D-galactoside galactohydrolase, putative
257764_AT	AT3G23010	disease resistance family protein / LRR family protein
252373_AT	AT3G48090	disease resistance protein (EDS1)
257751_AT	AT3G18690	VQ motif-containing protein
261269_AT	AT1G26690	emp24/gp25L/p24 family protein
255462_AT	AT4G02940	oxidoreductase, 2OG-Fe(II) oxygenase family protein
246597_AT	AT5G14760	L-aspartate oxidase family protein
256877_AT	AT3G26470	expressed protein
264929_AT	AT1G60730	aldo/keto reductase family protein
254201_AT	AT4G24130	expressed protein
254343_AT	AT4G21990	5'-adenylylsulfate reductase (APR3) / PAPS reductase homolog (PRH26)
266181_AT	AT2G02390	glutathione S-transferase zeta 1 (GSTZ1) (GST18)
264866_AT	AT1G24140	matrixin family protein
252076_AT	AT3G51660	macrophage migration inhibitory factor family protein / MIF family protein
266851_AT	AT2G26820	avirulence-responsive family protein / avirulence induced gene (AIG1) family protein
248123_AT	AT5G54720	ankyrin repeat family protein
256748_X_AT	AT3G30396	CACTA-like transposase family (Ptta/En/Spm)
266151_X_AT	AT2G12300	CACTA-like transposase family (Ptta/En/Spm)
253453_AT	AT4G31860	protein phosphatase 2C, putative / PP2C, putative
249974_AT	AT5G18780	F-box family protein
266269_AT	AT2G29480	glutathione S-transferase, putative
254723_AT	AT4G13510	ammonium transporter 1, member 1 (AMT1.1)
257022_AT	AT3G19580	zinc finger (C2H2 type) protein 2 (AZF2)
251884_AT	AT3G54150	embryo-abundant protein-related
256050_AT	AT1G07000	exocyst subunit EXO70 family protein
249096_AT	AT5G43910	pfkB-type carbohydrate kinase family protein
256300_AT	AT1G69490	no apical meristem (NAM) family protein
259447_S_AT	AT1G02430	ADP-ribosylation factor, putative
256833_AT	AT3G22910	calcium-transporting ATPase, plasma membrane-type, putative / Ca(2+)-ATPase, putative (ACA13)
263894_AT	AT2G21910	cytochrome P450, putative
262508_AT	AT1G11300	S-locus lectin protein kinase family protein
259276_AT	AT3G01190	peroxidase 27 (PER27) (P27) (PRXR7)
263582_AT	AT2G17120	peptidoglycan-binding LysM domain-containing protein
259120_AT	AT3G02240	expressed protein
255320_AT	AT4G04230	gypsy-like retrotransposon family
257617_AT	AT3G26550	DC1 domain-containing protein
250550_AT	AT5G07870	transferase family protein
250775_AT	AT5G05460	glycosyl hydrolase family 85 protein
245197_AT	AT1G67800	copine-related
262286_AT	AT1G68585	expressed protein
247655_AT	AT5G59820	zinc finger (C2H2 type) family protein (ZAT12)
251930_AT	AT3G53780	rhomboid family protein
257899_AT	AT3G28345	ABC transporter family protein
258382_AT	AT3G15355	ubiquitin-conjugating enzyme-related
246327_AT	AT1G16670	protein kinase family protein
245932_AT	AT5G09290	3'(2'),5'-bisphosphate nucleotidase, putative / inositol polyphosphate 1-phosphatase, putative
267008_AT	AT2G39350	ABC transporter family protein
258351_AT	AT3G17700	cyclic nucleotide-binding transporter 1 / CNBT1 (CNGC20)
265725_AT	AT2G32030	GCN5-related N-acetyltransferase (GNAT) family protein
247554_AT	AT5G61010	exocyst subunit EXO70 family protein
263584_AT	AT2G17040	no apical meristem (NAM) family protein
245731_AT	AT1G73500	mitogen-activated protein kinase kinase (MAPKK), putative (MKK9)
248942_AT	AT5G45480	expressed protein
258646_AT	AT3G08040	MATE efflux family protein
251419_AT	AT3G60470	hypothetical protein
262705_AT	AT1G16260	protein kinase family protein
263157_AT	AT1G54100	aldehyde dehydrogenase, putative / antiquitin, putative
259282_AT	AT3G11430	phospholipid/glycerol acyltransferase family protein
245363_AT	AT4G15120	VQ motif-containing protein
262082_S_AT	AT1G56120	leucine-rich repeat family protein / protein kinase family protein
261754_AT	AT1G76130	alpha-amylase, putative / 1,4-alpha-D-glucan glucanohydrolase, putative
267389_AT	AT2G44460	glycosyl hydrolase family 1 protein
266514_AT	AT2G47890	zinc finger (B-box type) family protein
258650_AT	AT3G09830	protein kinase, putative
258593_AT	AT3G04480	endoribonuclease L-PSP family protein
245566_AT	AT4G14610	pseudogene, disease resistance protein (CC-NBS-LRR class), putative
260419_AT	AT1G69730	protein kinase family protein
259911_AT	AT1G72680	cinnamyl-alcohol dehydrogenase, putative
248374_AT	AT5G51870	MADS-box protein (AGL71)
260303_AT	AT1G70520	protein kinase family protein
265428_AT	AT2G20720	pentatricopeptide (PPR) repeat-containing protein
248945_AT	AT5G45510	leucine-rich repeat family protein
248615_AT	AT5G49570	transglutaminase-like family protein
250024_AT	AT5G18270	no apical meristem (NAM) family protein
257955_AT	AT3G21810	zinc finger (CCCH-type) family protein
255595_AT	AT4G01700	chitinase, putative
257466_AT	AT1G62840	expressed protein
246858_AT	AT5G25930	leucine-rich repeat family protein / protein kinase family protein
256170_AT	AT1G51790	leucine-rich repeat protein kinase, putative
266162_AT	AT2G28160	basic helix-loop-helix (bHLH) family protein
267240_AT	AT2G02680	DC1 domain-containing protein
258275_AT	AT3G15760	expressed protein
254432_AT	AT4G20830	FAD-binding domain-containing protein
252549_AT	AT3G45860	receptor-like protein kinase, putative
262455_AT	AT1G11310	seven transmembrane MLO family protein / MLO-like protein 2 (MLO2)
258614_AT	AT3G02770	dimethylmenaquinone methyltransferase family protein
252060_AT	AT3G52430	phytoalexin-deficient 4 protein (PAD4)
253075_AT	AT4G36150	disease resistance protein (TIR-NBS-LRR class), putative
250500_AT	AT5G09530	hydroxyproline-rich glycoprotein family protein
262926_S_AT	AT1G65790	S-receptor protein kinase, putative
249221_AT	AT5G42440	protein kinase family protein
262607_AT	AT1G13990	expressed protein
263061_AT	AT2G18190	AAA-type ATPase family protein
257591_AT	AT3G24900	disease resistance family protein / LRR family protein
263848_AT	AT2G04580	hypothetical protein
266993_AT	AT2G39210	nodulin family protein
252417_AT	AT3G47480	calcium-binding EF hand family protein
256937_AT	AT3G22620	protease inhibitor/seed storage/lipid transfer protein (LTP) family protein
267181_AT	AT2G37760	aldo/keto reductase family protein
265159_AT	AT1G31060	expressed protein
252437_AT	AT3G47380	invertase/pectin methylesterase inhibitor family protein
256869_AT	AT3G26430	GDSL-motif lipase/hydrolase family protein
249289_AT	AT5G41040	transferase family protein
254256_AT	AT4G23180	receptor-like protein kinase 4, putative (RLK4)
256426_AT	AT1G33420	PHD finger family protein
265757_X_AT	AT2G13160	CACTA-like transposase family (Ptta/En/Spm)
261032_AT	AT1G17430	hydrolase, alpha/beta fold family protein
254870_AT	AT4G11900	S-locus lectin protein kinase family protein
267142_AT	AT2G38290	ammonium transporter 2 (AMT2)
257100_AT	AT3G25010	disease resistance family protein
260643_AT	AT1G53270	ABC transporter family protein
247476_AT	AT5G62330	expressed protein
252131_AT	AT3G50930	AAA-type ATPase family protein
257810_AT	AT3G27070	mitochondrial import receptor subunit TOM20-1 / translocase of outer membrane 20 kDa subunit 1 (TOM20-1)
246777_AT	AT5G27420	zinc finger (C3HC4-type RING finger) family protein
250983_AT	AT5G02780	In2-1 protein, putative
245220_AT	AT1G59171	hypothetical protein
250781_AT	AT5G05410	DRE-binding protein (DREB2A)
257745_AT	AT3G29240	expressed protein
263374_AT	AT2G20560	DNAJ heat shock family protein
249078_AT	AT5G44070	phytochelatin synthase 1 (PCS1)
249480_S_AT	AT5G38990	protein kinase family protein
245113_AT	AT2G41660	expressed protein
257888_AT	AT3G16990	TENA/THI-4 family protein
245181_AT	AT5G12420	expressed protein
249487_AT	AT5G39040	ABC transporter (TAP2)
258100_AT	AT3G23550	MATE efflux family protein
266967_AT	AT2G39530	integral membrane protein, putative
261585_AT	AT1G01010	no apical meristem (NAM) family protein
248717_AT	AT5G48175	expressed protein
259481_AT	AT1G18970	germin-like protein (GLP1) (GLP4)
253377_AT	AT4G33300	disease resistance protein (CC-NBS-LRR class), putative
263403_AT	AT2G04040	MATE efflux family protein
259979_AT	AT1G76600	expressed protein
247769_AT	AT5G58910	laccase, putative / diphenol oxidase, putative
251370_AT	AT3G60450	expressed protein
254112_AT	AT4G24970	ATP-binding region, ATPase-like domain-containing protein
258957_AT	AT3G01420	pathogen-responsive alpha-dioxygenase, putative
266070_AT	AT2G18660	expansin family protein (EXPR3)
246841_AT	AT5G26696	'nectarin - like protein nectarin I precursor, Nicotiana plumbaginifolia, EMBL:AF132671; supported by full-length cDNA: Ceres: 14379. '
262894_AT	AT1G59780	disease resistance protein (CC-NBS-LRR class), putative
263228_AT	AT1G30700	FAD-binding domain-containing protein
257997_AT	AT3G27500	DC1 domain-containing protein
252073_AT	AT3G51750	expressed protein
245277_AT	AT4G15550	UDP-glucose
265276_AT	AT2G28400	expressed protein
250670_AT	AT5G06860	polygalacturonase inhibiting protein 1 (PGIP1)
249264_S_AT	AT5G41740	disease resistance protein (TIR-NBS-LRR class), putative
266368_AT	AT2G41380	embryo-abundant protein-related
254211_AT	AT4G23570	phosphatase-related
255259_AT	AT4G05020	NADH dehydrogenase-related
266782_AT	AT2G29120	glutamate receptor family protein (GLR2.7)
259980_AT	AT1G76520	auxin efflux carrier family protein
257026_AT	AT3G19200	hypothetical protein
265754_X_AT	AT2G10640	CACTA-like transposase family (Ptta/En/Spm)
246405_AT	AT1G57630	disease resistance protein (TIR class), putative
262314_AT	AT1G70810	C2 domain-containing protein
256453_AT	AT1G75270	dehydroascorbate reductase, putative
251509_AT	AT3G59010	pectinesterase family protein
265067_AT	AT1G03850	glutaredoxin family protein
245052_AT	AT2G26440	pectinesterase family protein
267483_AT	AT2G02810	UDP-galactose/UDP-glucose transporter
262936_AT	AT1G79400	cation/proton exchanger, putative (CHX2)
249770_AT	AT5G24110	WRKY family transcription factor
246927_S_AT	AT5G25260	expressed protein
247573_AT	AT5G61160	transferase family protein
261021_AT	AT1G26380	FAD-binding domain-containing protein
248971_AT	AT5G45000	Toll-Interleukin-Resistance (TIR) domain-containing protein
260535_AT	AT2G43390	expressed protein
262408_AT	AT1G34750	protein phosphatase 2C, putative / PP2C, putative
256100_AT	AT1G13750	calcineurin-like phosphoesterase family protein
252340_AT	AT3G48920	myb family transcription factor (MYB45)
247488_AT	AT5G61820	expressed protein
249417_AT	AT5G39670	calcium-binding EF hand family protein
252511_AT	AT3G46280	protein kinase-related
251422_AT	AT3G60540	sec61beta family protein
263182_AT	AT1G05575	expressed protein
260234_AT	AT1G74460	GDSL-motif lipase/hydrolase family protein
251053_AT	AT5G01490	cation exchanger, putative (CAX4)
248134_AT	AT5G54860	integral membrane transporter family protein
246305_AT	AT3G51890	expressed protein
255508_AT	AT4G02220	zinc finger (MYND type) family protein / programmed cell death 2 C-terminal domain-containing protein
252651_AT	AT3G44700	expressed protein
250239_AT	AT5G13580	ABC transporter family protein
252671_AT	AT3G44190	pyridine nucleotide-disulphide oxidoreductase family protein
252126_AT	AT3G50950	disease resistance protein (CC-NBS-LRR class), putative
257612_AT	AT3G26600	armadillo/beta-catenin repeat family protein
267028_AT	AT2G38470	WRKY family transcription factor
260035_AT	AT1G68850	peroxidase, putative
263402_AT	AT2G04050	MATE efflux family protein
262832_S_AT	AT1G14870	expressed protein
257481_AT	AT1G08430	expressed protein
250287_AT	AT5G13330	AP2 domain-containing transcription factor family protein
252170_AT	AT3G50480	broad-spectrum mildew resistance RPW8 family protein
260030_AT	AT1G68880	bZIP transcription factor family protein
255503_AT	AT4G02420	lectin protein kinase, putative
249055_AT	AT5G44460	calcium-binding protein, putative
253841_AT	AT4G27830	glycosyl hydrolase family 1 protein
246098_AT	AT5G20400	oxidoreductase, 2OG-Fe(II) oxygenase family protein
258452_AT	AT3G22370	alternative oxidase 1a, mitochondrial (AOX1A)
260601_AT	AT1G55910	metal transporter, putative (ZIP11)
249021_AT	AT5G44820	expressed protein
258203_AT	AT3G13950	expressed protein
259705_AT	AT1G77450	no apical meristem (NAM) family protein
257217_AT	AT3G14940	phosphoenolpyruvate carboxylase, putative / PEP carboxylase, putative
266247_AT	AT2G27660	DC1 domain-containing protein
267267_AT	AT2G02580	cytochrome P450 family protein
265499_AT	AT2G15480	UDP-glucoronosyl/UDP-glucosyl transferase family protein
253987_AT	AT4G26270	phosphofructokinase family protein
252977_AT	AT4G38560	expressed protein
249881_AT	AT5G23190	cytochrome P450 family protein
249983_AT	AT5G18470	curculin-like (mannose-binding) lectin family protein
257101_AT	AT3G25020	disease resistance family protein
248944_AT	AT5G45500	expressed protein
257061_AT	AT3G18250	expressed protein
250445_AT	AT5G10760	aspartyl protease family protein
254630_AT	AT4G18360	(S)-2-hydroxy-acid oxidase, peroxisomal, putative / glycolate oxidase, putative / short chain alpha-hydroxy acid oxidase, putative
252587_AT	AT3G45620	transducin family protein / WD-40 repeat family protein
265414_AT	AT2G16660	nodulin family protein
256169_AT	AT1G51800	leucine-rich repeat protein kinase, putative
247966_AT	AT5G56610	dual specificity protein phosphatase family protein
249897_AT	AT5G22550	expressed protein
254550_AT	AT4G19690	iron-responsive transporter (IRT1)
267300_AT	AT2G30140	UDP-glucoronosyl/UDP-glucosyl transferase family protein
253779_AT	AT4G28490	leucine-rich repeat transmembrane protein kinase, putative
256596_AT	AT3G28540	AAA-type ATPase family protein
250230_AT	AT5G13900	protease inhibitor/seed storage/lipid transfer protein (LTP) family protein
252447_AT	AT3G47040	glycosyl hydrolase family 3 protein
258893_AT	AT3G05660	disease resistance family protein
260804_AT	AT1G78410	VQ motif-containing protein
248987_AT	AT5G45180	flavin-containing monooxygenase family protein / FMO family protein
267165_AT	AT2G37710	lectin protein kinase, putative
246368_AT	AT1G51890	leucine-rich repeat protein kinase, putative
260116_AT	AT1G33960	avirulence-responsive protein / avirulence induced gene (AIG1)
245074_AT	AT2G23200	protein kinase family protein
251970_AT	AT3G53150	UDP-glucoronosyl/UDP-glucosyl transferase family protein
263478_AT	AT2G31880	leucine-rich repeat transmembrane protein kinase, putative
265917_AT	AT2G15080	disease resistance family protein
246067_AT	AT5G19410	ABC transporter family protein
261892_AT	AT1G80840	WRKY family transcription factor
246831_AT	AT5G26340	hexose transporter, putative
260932_S_AT	AT1G02530	multidrug resistance P-glycoprotein, putative
249918_AT	AT5G19240	expressed protein
264842_AT	AT1G03700	integral membrane family protein
259875_S_AT	AT1G76690	12-oxophytodienoate reductase (OPR2)
254948_AT	AT4G11000	ankyrin repeat family protein
267024_S_AT	AT2G34390	major intrinsic family protein / MIP family protein
265993_AT	AT2G24160	pseudogene, leucine rich repeat protein family
260405_AT	AT1G69930	glutathione S-transferase, putative
264107_S_AT	AT2G13790	leucine-rich repeat family protein / protein kinase family protein
254396_AT	AT4G21680	proton-dependent oligopeptide transport (POT) family protein
259251_AT	AT3G07600	heavy-metal-associated domain-containing protein
263005_AT	AT1G54540	hypothetical protein
261161_AT	AT1G34420	leucine-rich repeat family protein / protein kinase family protein
251942_AT	AT3G53480	ABC transporter family protein
255844_AT	AT2G33580	protein kinase family protein / peptidoglycan-binding LysM domain-containing protein
252196_AT	AT3G50200	expressed protein
249494_AT	AT5G39050	transferase family protein
266385_AT	AT2G14610	pathogenesis-related protein 1 (PR-1)
250541_AT	AT5G09520	hydroxyproline-rich glycoprotein family protein
252117_AT	AT3G51430	strictosidine synthase, putative (YLS2)
250062_AT	AT5G17760	AAA-type ATPase family protein
266835_AT	AT2G29990	pyridine nucleotide-disulphide oxidoreductase family protein
245193_AT	AT1G67810	Fe-S metabolism associated domain-containing protein
251545_AT	AT3G58810	zinc transporter, putative
259671_AT	AT1G52290	protein kinase family protein
260522_X_AT	AT2G41730	expressed protein
247283_AT	AT5G64250	2-nitropropane dioxygenase family / NPD family
254289_AT	AT4G22980	expressed protein
252908_AT	AT4G39670	expressed protein
255958_AT	AT1G22150	sulfate transporter (Sultr1;3)
263800_AT	AT2G24600	ankyrin repeat family protein
252533_AT	AT3G46110	expressed protein
262507_AT	AT1G11330	S-locus lectin protein kinase family protein
253997_AT	AT4G26090	disease resistance protein RPS2 (CC-NBS-LRR class), putative
247448_AT	AT5G62770	expressed protein
266290_AT	AT2G29490	glutathione S-transferase, putative
254833_S_AT	AT4G12280	copper amine oxidase family protein
258787_AT	AT3G11840	U-box domain-containing protein
264434_AT	AT1G10340	ankyrin repeat family protein
257083_S_AT	AT3G20590	non-race specific disease resistance protein, putative
245767_AT	AT1G33610	leucine-rich repeat family protein
257623_AT	AT3G26210	cytochrome P450 71B23, putative (CYP71B23)
245352_AT	AT4G15490	UDP-glucoronosyl/UDP-glucosyl transferase family protein
249125_AT	AT5G43450	2-oxoglutarate-dependent dioxygenase, putative
263184_AT	AT1G05560	UDP-glucose transferase (UGT75B2)
245209_AT	AT5G12340	expressed protein
251944_AT	AT3G53510	ABC transporter family protein
259560_AT	AT1G21270	wall-associated kinase 2 (WAK2)
247351_AT	AT5G63790	no apical meristem (NAM) family protein
255291_AT	AT4G04700	calcium-dependent protein kinase, putative / CDPK, putative
266296_AT	AT2G29420	glutathione S-transferase, putative
263783_AT	AT2G46400	WRKY family transcription factor
246821_AT	AT5G26920	calmodulin-binding protein
249188_AT	AT5G42830	transferase family protein
256366_AT	AT1G66880	serine/threonine protein kinase family protein
249004_AT	AT5G44570	hypothetical protein
267288_AT	AT2G23680	stress-responsive protein, putative
246584_AT	AT5G14730	expressed protein
260567_AT	AT2G43820	UDP-glucoronosyl/UDP-glucosyl transferase family protein
254532_AT	AT4G19660	ankyrin repeat family protein / BTB/POZ domain-containing protein
252638_AT	AT3G44540	acyl CoA reductase, putative
246203_AT	AT4G36610	hydrolase, alpha/beta fold family protein
260517_AT	AT1G51420	sucrose-phosphatase, putative
264042_AT	AT2G03760	steroid sulfotransferase, putative
255148_AT	AT4G08470	mitogen-activated protein kinase, putative
245076_AT	AT2G23170	auxin-responsive GH3 family protein
259261_AT	AT3G11390	DC1 domain-containing protein
250252_AT	AT5G13750	transporter-related
252403_AT	AT3G48080	lipase class 3 family protein / disease resistance protein-related
264912_AT	AT1G60750	pseudogene, aldo/keto reductase family
267076_AT	AT2G41090	calmodulin-like calcium-binding protein, 22 kDa (CaBP-22)
253268_S_AT	AT4G34135	UDP-glucoronosyl/UDP-glucosyl transferase family protein
254231_AT	AT4G23810	WRKY family transcription factor
260179_AT	AT1G70690	kinase-related
258984_AT	AT3G08970	DNAJ heat shock N-terminal domain-containing protein
246988_AT	AT5G67340	armadillo/beta-catenin repeat family protein / U-box domain-containing protein
263675_X_AT	AT2G04770	CACTA-like transposase family (Ptta/En/Spm)
259428_AT	AT1G01560	mitogen-activated protein kinase, putative / MAPK, putative (MPK11)
253414_AT	AT4G33050	calmodulin-binding family protein
253837_AT	AT4G27850	proline-rich family protein
262374_S_AT	AT1G72930	Toll-Interleukin-Resistance (TIR) domain-containing protein
254521_AT	AT5G44810	putative protein similar to unknown protein (gb|AAC79139.1)
264843_AT	AT1G03400	2-oxoglutarate-dependent dioxygenase, putative
259507_AT	AT1G43910	AAA-type ATPase family protein
263539_AT	AT2G24850	aminotransferase, putative
245611_AT	AT4G14390	ankyrin repeat family protein
248062_AT	AT5G55450	protease inhibitor/seed storage/lipid transfer protein (LTP) family protein
263776_S_AT	AT2G46440	cyclic nucleotide-regulated ion channel, putative (CNGC11)
262118_AT	AT1G02850	glycosyl hydrolase family 1 protein
254265_S_AT	AT4G23140	receptor-like protein kinase 5 (RLK5)
262942_AT	AT1G79450	LEM3 (ligand-effect modulator 3) family protein / CDC50 family protein
257924_AT	AT3G23190	lesion inducing protein-related
256018_AT	AT1G58300	heme oxygenase, putative
264148_AT	AT1G02220	no apical meristem (NAM) family protein
247602_AT	AT5G60900	lectin protein kinase family protein
256489_AT	AT1G31550	GDSL-motif lipase, putative
248319_AT	AT5G52710	heavy-metal-associated domain-containing protein
251063_AT	AT5G01850	protein kinase, putative
261443_AT	AT1G28480	glutaredoxin family protein
251677_AT	AT3G56980	basic helix-loop-helix (bHLH) family protein
255543_AT	AT4G01870	tolB protein-related
253485_AT	AT4G31800	WRKY family transcription factor
262381_AT	AT1G72900	disease resistance protein (TIR-NBS class), putative
248048_AT	AT5G56080	nicotianamine synthase, putative
245038_AT	AT2G26560	patatin, putative
260648_AT	AT1G08050	zinc finger (C3HC4-type RING finger) family protein
259228_AT	AT3G07720	kelch repeat-containing protein
258277_AT	AT3G26830	cytochrome P450 71B15, putative (CYP71B15)
264282_AT	AT1G61840	DC1 domain-containing protein
264362_AT	AT1G03290	expressed protein
251400_AT	AT3G60420	expressed protein
259260_AT	AT3G11370	DC1 domain-containing protein
248381_AT	AT5G51830	pfkB-type carbohydrate kinase family protein
259297_AT	AT3G05360	disease resistance family protein / LRR family protein
254869_AT	AT4G11890	protein kinase family protein
248981_AT	AT5G45110	ankyrin repeat family protein / BTB/POZ domain-containing protein
260211_AT	AT1G74440	expressed protein
253101_AT	AT4G37430	cytochrome P450 81F1 (CYP81F1) (CYP91A2)
264861_AT	AT1G24320	alpha-glucosidase, putative
254759_AT	AT4G13180	short-chain dehydrogenase/reductase (SDR) family protein
248330_AT	AT5G52810	ornithine cyclodeaminase/mu-crystallin family protein
258982_AT	AT3G08870	lectin protein kinase, putative
254255_AT	AT4G23220	protein kinase family protein
258063_AT	AT3G14620	cytochrome P450, putative
260803_AT	AT1G78340	glutathione S-transferase, putative
253993_AT	AT4G26070	mitogen-activated protein kinase kinase (MAPKK) (MKK1) (MEK1)
256289_S_AT	AT3G12230	serine carboxypeptidase S10 family protein
251824_AT	AT3G55090	ABC transporter family protein
256589_AT	AT3G28740	cytochrome P450 family protein
255319_AT	AT4G04220	disease resistance family protein
245329_AT	AT4G14365	zinc finger (C3HC4-type RING finger) family protein / ankyrin repeat family protein
258537_AT	AT3G04210	disease resistance protein (TIR-NBS class), putative
253046_AT	AT4G37370	cytochrome P450, putative
249777_AT	AT5G24210	lipase class 3 family protein
248322_AT	AT5G52760	heavy-metal-associated domain-containing protein
247293_AT	AT5G64510	expressed protein
265189_AT	AT1G23840	expressed protein
267573_AT	AT2G30670	tropinone reductase, putative / tropine dehydrogenase, putative
265698_AT	AT2G32160	expressed protein
259385_AT	AT1G13470	expressed protein
257823_AT	AT3G25190	nodulin, putative
267496_AT	AT2G30550	lipase class 3 family protein
259454_AT	AT1G44050	DC1 domain-containing protein
257480_AT	AT1G15640	hypothetical protein
257763_S_AT	AT3G23110	disease resistance family protein
256576_AT	AT3G28210	zinc finger (AN1-like) family protein
251232_AT	AT3G62780	C2 domain-containing protein
260068_AT	AT1G73805	calmodulin-binding protein
256431_S_AT	AT3G11010	disease resistance family protein / LRR family protein
245976_AT	AT5G13080	WRKY family transcription factor
260046_AT	AT1G73800	calmodulin-binding protein
254318_AT	AT4G22530	embryo-abundant protein-related
266176_AT	AT2G02250	F-box family protein / SKP1 interacting partner 3-related
254093_AT	AT4G25110	latex-abundant family protein (AMC2) / caspase family protein
251621_AT	AT3G57700	protein kinase, putative
261339_AT	AT1G35710	leucine-rich repeat transmembrane protein kinase, putative
262518_AT	AT1G17170	glutathione S-transferase, putative
262743_AT	AT1G29020	calcium-binding EF hand family protein
262517_AT	AT1G17180	glutathione S-transferase, putative
249754_AT	AT5G24530	oxidoreductase, 2OG-Fe(II) oxygenase family protein
261690_AT	AT1G50090	aminotransferase class IV family protein
249295_AT	AT5G41280	hypothetical protein
250747_AT	AT5G05900	UDP-glucoronosyl/UDP-glucosyl transferase family protein
248327_AT	AT5G52750	heavy-metal-associated domain-containing protein
245265_AT	AT4G14400	ankyrin repeat family protein
254536_AT	AT4G19720	glycosyl hydrolase family 18 protein
251673_AT	AT3G57240	beta-1,3-glucanase (BG3)
250942_AT	AT5G03350	legume lectin family protein
254416_AT	AT4G21380	S-locus protein kinase, putative (ARK3)
259561_AT	AT1G21250	wall-associated kinase 1 (WAK1)
250302_AT	AT5G11920	glycosyl hydrolase family 32 protein
259213_AT	AT3G09010	protein kinase family protein
247727_AT	AT5G59490	haloacid dehalogenase-like hydrolase family protein
256766_AT	AT3G22231	expressed protein
256252_AT	AT3G11340	UDP-glucoronosyl/UDP-glucosyl transferase family protein
248978_AT	AT5G45070	disease resistance protein (TIR class), putative
261221_AT	AT1G19960	expressed protein
253181_AT	AT4G35180	amino acid transporter family protein
246293_AT	AT3G56710	sigA-binding protein
251705_AT	AT3G56400	WRKY family transcription factor
265501_AT	AT2G15490	UDP-glucoronosyl/UDP-glucosyl transferase family protein
263231_AT	AT1G05680	UDP-glucoronosyl/UDP-glucosyl transferase family protein
249893_AT	AT5G22555	expressed protein
249890_AT	AT5G22570	WRKY family transcription factor
265837_AT	AT2G14560	expressed protein
257382_AT	AT2G40750	WRKY family transcription factor
245035_AT	AT2G26400	acireductone dioxygenase (ARD/ARD') family protein
256593_AT	AT3G28510	AAA-type ATPase family protein
260904_AT	AT1G02450	NPR1/NIM1-interacting protein 1 (NIMIN-1)
254975_AT	AT4G10500	oxidoreductase, 2OG-Fe(II) oxygenase family protein
248169_AT	AT5G54610	ankyrin repeat family protein

## Sheet: MJ responses
regulated all MJ
Affy ID	AGI	Description
267591_AT	AT2G39705	expressed protein
267590_AT	AT2G39700	expansin, putative (EXP4)
267580_AT	AT2G41990	expressed protein
267546_AT	AT2G32680	disease resistance family protein
267425_AT	AT2G34810	FAD-binding domain-containing protein
267418_AT	AT2G35000	zinc finger (C3HC4-type RING finger) family protein
267411_AT	AT2G34930	disease resistance family protein
267389_AT	AT2G44460	glycosyl hydrolase family 1 protein
267385_AT	AT2G44380	DC1 domain-containing protein
267384_AT	AT2G44370	DC1 domain-containing protein
267372_AT	AT2G26290	protein kinase, putative
267341_AT	AT2G44200	expressed protein
267298_AT	AT2G23760	BEL1-like homeobox 4 protein (BLH4)
267288_AT	AT2G23680	stress-responsive protein, putative
267276_AT	AT2G30130	LOB domain protein 12 / lateral organ boundaries domain protein 12 (LBD12)
267266_AT	AT2G23150	NRAMP metal ion transporter 3 (NRAMP3)
267256_S_AT	AT2G23000	serine carboxypeptidase S10 family protein
267206_AT	AT2G30830	2-oxoglutarate-dependent dioxygenase, putative
267177_AT	AT2G37580	zinc finger (C3HC4-type RING finger) family protein
267169_AT	AT2G37540	short-chain dehydrogenase/reductase (SDR) family protein
267147_AT	AT2G38240	oxidoreductase, 2OG-Fe(II) oxygenase family protein
267128_AT	AT2G23620	esterase, putative
267123_AT	AT2G23560	hydrolase, alpha/beta fold family protein
267112_AT	AT2G14750	adenylylsulfate kinase 1 (AKN1)
267101_AT	AT2G41480	peroxidase, putative
267075_AT	AT2G41070	basic leucine zipper transcription factor (BZIP12)
266989_AT	AT2G39330	jacalin lectin family protein
266977_AT	AT2G39420	esterase/lipase/thioesterase family protein
266962_AT	AT2G39440	expressed protein
266946_AT	AT2G18890	protein kinase family protein
266930_AT	AT2G45930	expressed protein
266912_AT	AT2G45900	expressed protein
266908_AT	AT2G34650	protein kinase PINOID (PID)
266901_AT	AT2G34600	expressed protein
266828_AT	AT2G22930	glycosyltransferase family protein
266821_AT	AT2G44840	ethylene-responsive element-binding protein, putative
266820_AT	AT2G44940	AP2 domain-containing transcription factor TINY, putative
266800_AT	AT2G22880	VQ motif-containing protein
266799_AT	AT2G22860	phytosulfokines 2 (PSK2)
266798_AT	AT2G22850	bZIP transcription factor family protein
266778_AT	AT2G29090	cytochrome P450 family protein
266745_AT	AT2G02950	phytochrome kinase substrate 1 (PKS1)
266720_S_AT	AT2G46790	pseudo-response regulator 9 (APRR9) / timing of CAB expression 1-like protein (TL1)
266661_AT	AT2G25820	transcription factor, putative
266658_AT	AT2G25735	expressed protein
266590_AT	AT2G46240	IQ domain-containing protein / BAG domain-containing protein
266555_AT	AT2G46270	G-box binding factor 3 (GBF3)
266526_AT	AT2G16980	expressed protein
266486_AT	AT2G47950	expressed protein
266469_AT	AT2G31180	myb family transcription factor (MYB14)
266456_AT	AT2G22770	basic helix-loop-helix (bHLH) family protein
266455_AT	AT2G22760	basic helix-loop-helix (bHLH) family protein
266425_AT	AT2G41300	strictosidine synthase family protein
266419_AT	AT2G38760	annexin 3 (ANN3)
266418_AT	AT2G38750	annexin 4 (ANN4)
266381_AT	AT2G14670	sucrose transporter, putative / sucrose-proton symporter, putative
266364_AT	AT2G41230	expressed protein
266363_AT	AT2G41250	haloacid dehalogenase-like hydrolase family protein
266326_AT	AT2G46650	cytochrome b5, putative
266299_AT	AT2G29450	glutathione S-transferase (103-1A)
266290_AT	AT2G29490	glutathione S-transferase, putative
266279_AT	AT2G29290	tropinone reductase, putative / tropine dehydrogenase, putative
266277_AT	AT2G29310	tropinone reductase, putative / tropine dehydrogenase, putative
266271_AT	AT2G29440	glutathione S-transferase, putative
266267_AT	AT2G29460	glutathione S-transferase, putative
266259_AT	AT2G27830	expressed protein
266246_AT	AT2G27690	cytochrome P450, putative
266232_AT	AT2G02310	F-box family protein / SKP1 interacting partner 3-related
266218_S_AT	AT2G28850	cytochrome P450 family protein
266209_AT	AT2G27550	centroradialis protein, putative (CEN)
266150_S_AT	AT2G12290	hypothetical protein
266148_X_AT	AT2G12240	CACTA-like transposase family (Ptta/En/Spm)
266147_AT	AT2G12230	pseudogene, C-1-tetrahydrofolate synthase
266142_AT	AT2G39030	GCN5-related N-acetyltransferase (GNAT) family protein
266011_AT	AT2G37440	endonuclease/exonuclease/phosphatase family protein
266006_AT	AT2G37360	ABC transporter family protein
265999_AT	AT2G24100	expressed protein
265993_AT	AT2G24160	pseudogene, leucine rich repeat protein family
265955_AT	AT2G37280	ABC transporter family protein
265924_AT	AT2G18620	geranylgeranyl pyrophosphate synthase, putative / GGPP synthetase, putative / farnesyltranstransferase, putative
265918_AT	AT2G15090	fatty acid elongase, putative
265899_S_AT	AT2G25700	E3 ubiquitin ligase SCF complex subunit SKP1/ASK1 (At3), putative
265880_AT	AT2G42300	basic helix-loop-helix (bHLH) family protein
265872_AT	AT2G01670	MutT/nudix family protein
265846_AT	AT2G35770	serine carboxypeptidase S10 family protein
265837_AT	AT2G14560	expressed protein
265823_AT	AT2G35760	integral membrane family protein
265792_AT	AT2G01380	predicted by genscan and genefinder
265772_AT	AT2G48010	serine/threonine protein kinase (RFK3)
265757_X_AT	AT2G13160	CACTA-like transposase family (Ptta/En/Spm)
265754_X_AT	AT2G10640	CACTA-like transposase family (Ptta/En/Spm)
265723_AT	AT2G32140	disease resistance protein (TIR class), putative
265680_AT	AT2G32150	haloacid dehalogenase-like hydrolase family protein
265670_S_AT	AT2G32210	expressed protein
265654_S_AT	AT2G13870	CACTA-like transposase family (Ptta/En/Spm)
265653_AT	AT2G13880	hypothetical protein
265620_AT	AT2G27310	F-box family protein
265553_AT	AT2G07550	copia-like retrotransposon family
265545_AT	AT2G28250	protein kinase family protein
265530_AT	AT2G06050	12-oxophytodienoate reductase (OPR3) / delayed dehiscence1 (DDE1)
265490_S_AT	AT2G15470	glycoside hydrolase family 28 protein / polygalacturonase (pectinase) family protein
265479_AT	AT2G15760	calmodulin-binding protein
265452_AT	AT2G46510	basic helix-loop-helix (bHLH) family protein
265387_AT	AT2G20670	expressed protein
265379_AT	AT2G18340	late embryogenesis abundant domain-containing protein / LEA domain-containing protein
265342_AT	AT2G18300	basic helix-loop-helix (bHLH) family protein
265327_AT	AT2G18210	expressed protein
265314_AT	AT2G20210	leucine-rich repeat family protein
265305_AT	AT2G20340	tyrosine decarboxylase, putative
265276_AT	AT2G28400	expressed protein
265244_AT	AT2G43020	amine oxidase family protein
265238_S_AT	AT2G07696	ribosomal protein S7 family protein
265203_AT	AT2G36630	expressed protein
265159_AT	AT1G31060	expressed protein
265118_AT	AT1G62660	beta-fructosidase (BFRUCT3) / beta-fructofuranosidase / invertase, vacuolar
265091_S_AT	AT1G03495	pseudogene, transferase family
265067_AT	AT1G03850	glutaredoxin family protein
265058_S_AT	AT1G52040	jacalin lectin family protein
265053_AT	AT1G52000	jacalin lectin family protein
265028_AT	AT1G24530	transducin family protein / WD-40 repeat family protein
265024_AT	AT1G24600	expressed protein
264931_AT	AT1G60590	polygalacturonase, putative / pectinase, putative
264886_AT	AT1G61120	terpene synthase/cyclase family protein
264877_AT	AT2G17330	pseudogene, obtusifoliol 14-alpha demethylase, putative
264873_AT	AT1G24100	UDP-glucoronosyl/UDP-glucosyl transferase family protein
264843_AT	AT1G03400	2-oxoglutarate-dependent dioxygenase, putative
264783_AT	AT1G08650	phosphoenolpyruvate carboxylase kinase
264752_AT	AT1G23010	multi-copper oxidase type I family protein
264652_AT	AT1G08920	sugar transporter, putative
264647_AT	AT1G09090	respiratory burst oxidase protein B (RbohB) / NADPH oxidase
264636_AT	AT1G65490	expressed protein
264623_AT	AT1G09000	NPK1-related protein kinase, putative (ANP1)
264580_AT	AT1G05340	expressed protein
264565_AT	AT1G05280	fringe-related protein
264562_AT	AT1G55760	BTB/POZ domain-containing protein
264529_AT	AT1G30820	CTP synthase, putative / UTP--ammonia ligase, putative
264524_AT	AT1G10070	branched-chain amino acid aminotransferase 2 / branched-chain amino acid transaminase 2 (BCAT2)
264501_AT	AT1G09390	GDSL-motif lipase/hydrolase family protein
264497_AT	AT1G30840	purine permease-related
264470_AT	AT1G67110	cytochrome P450, putative
264442_AT	AT1G27480	lecithin
264433_AT	AT1G61810	glycosyl hydrolase family 1 protein
264415_AT	AT1G43160	AP2 domain-containing protein RAP2.6 (RAP2.6)
264403_AT	AT2G25150	transferase family protein
264400_AT	AT1G61800	glucose-6-phosphate/phosphate translocator, putative
264314_AT	AT1G70420	expressed protein
264289_AT	AT1G61890	MATE efflux family protein
264280_AT	AT1G61820	glycosyl hydrolase family 1 protein
264271_AT	AT1G60270	pseudogene, glycosyl hydrolase family 1
264270_AT	AT1G60260	pseudogene, glycosyl hydrolase family 1
264148_AT	AT1G02220	no apical meristem (NAM) family protein
264145_AT	AT1G79310	latex-abundant protein, putative (AMC4) / caspase family protein
264119_AT	AT1G79180	myb family transcription factor (MYB63)
264083_AT	AT2G31230	ethylene-responsive factor, putative
264052_AT	AT2G22330	cytochrome P450, putative
263972_AT	AT2G42760	expressed protein
263970_AT	AT2G42850	cytochrome P450 family protein
263968_S_AT	AT2G12980	CACTA-like transposase family (Ptta/En/Spm)
263918_AT	AT2G36590	proline transporter, putative
263915_AT	AT2G36430	expressed protein
263904_AT	AT2G36380	ABC transporter family protein
263871_AT	AT2G22020	hypothetical protein predicted by genscan
263870_AT	AT2G22010	zinc finger (C3HC4-type RING finger) family protein
263851_AT	AT2G04460	expressed protein
263829_AT	AT2G40435	expressed protein
263807_AT	AT2G04400	indole-3-glycerol phosphate synthase (IGPS)
263772_AT	AT2G06255	expressed protein
263675_X_AT	AT2G04770	CACTA-like transposase family (Ptta/En/Spm)
263596_AT	AT2G01900	endonuclease/exonuclease/phosphatase family protein
263594_AT	AT2G01880	purple acid phosphatase (PAP7)
263584_AT	AT2G17040	no apical meristem (NAM) family protein
263539_AT	AT2G24850	aminotransferase, putative
263486_AT	AT2G22200	AP2 domain-containing transcription factor
263482_AT	AT2G03980	GDSL-motif lipase/hydrolase family protein
263443_AT	AT2G28630	beta-ketoacyl-CoA synthase family protein
263405_S_AT	AT2G04080	MATE efflux family protein
263391_AT	AT2G11810	1,2-diacylglycerol 3-beta-galactosyltransferase, putative / monogalactosyldiacylglycerol synthase, putative / MGDG synthase, putative
263380_AT	AT2G40200	basic helix-loop-helix (bHLH) family protein
263320_AT	AT2G47180	galactinol synthase, putative
263318_AT	AT2G24762	expressed protein
263232_AT	AT1G05700	leucine-rich repeat protein kinase, putative
263228_AT	AT1G30700	FAD-binding domain-containing protein
263210_AT	AT1G10585	expressed protein
263182_AT	AT1G05575	expressed protein
263180_AT	AT1G05620	inosine-uridine preferring nucleoside hydrolase family protein
263174_AT	AT1G54040	kelch repeat-containing protein
263161_AT	AT1G54020	myrosinase-associated protein, putative
263157_AT	AT1G54100	aldehyde dehydrogenase, putative / antiquitin, putative
263156_AT	AT1G54030	GDSL-motif lipase, putative
263150_AT	AT1G54050	17.4 kDa class III heat shock protein (HSP17.4-CIII)
263137_AT	AT1G78660	gamma-glutamyl hydrolase, putative / gamma-Glu-X carboxypeptidase, putative / conjugase, putative
263133_AT	AT1G78450	SOUL heme-binding family protein
263120_AT	AT1G78490	cytochrome P450 family protein
263073_AT	AT2G17500	auxin efflux carrier family protein
263061_AT	AT2G18190	AAA-type ATPase family protein
263032_AT	AT1G23850	expressed protein
263031_AT	AT1G24070	glycosyl transferase family 2 protein
262986_AT	AT1G23390	kelch repeat-containing F-box family protein
262967_AT	AT1G75730	expressed protein
262915_AT	AT1G59940	two-component responsive regulator / response regulator 3 (ARR3)
262831_AT	AT1G14730	cytochrome B561 family
262830_AT	AT1G14700	purple acid phosphatase, putative
262826_AT	AT1G13080	cytochrome P450 family protein
262762_AT	AT1G10700	ribose-phosphate pyrophosphokinase 3 / phosphoribosyl diphosphate synthetase 3 (PRS3)
262756_AT	AT1G16370	transporter-related
262715_AT	AT1G16490	myb family transcription factor (MYB58)
262705_AT	AT1G16260	protein kinase family protein
262698_AT	AT1G75960	AMP-binding protein, putative
262661_S_AT	AT1G14250	nucleoside phosphatase family protein / GDA1/CD39 family protein
262653_AT	AT1G14130	2-oxoglutarate-dependent dioxygenase, putative
262616_AT	AT1G06620	2-oxoglutarate-dependent dioxygenase, putative
262608_AT	AT1G14120	2-oxoglutarate-dependent dioxygenase, putative
262516_AT	AT1G17190	glutathione S-transferase, putative
262475_AT	AT1G50340	invertase/pectin methylesterase inhibitor family protein
262464_AT	AT1G50280	phototropic-responsive NPH3 family protein
262431_AT	AT1G47540	trypsin inhibitor, putative
262392_AT	AT1G49520	SWIB complex BAF60b domain-containing protein
262391_AT	AT1G49530	geranylgeranyl pyrophosphate synthase (GGPS6) / GGPP synthetase / farnesyltranstransferase
262390_AT	AT1G49260	hypothetical protein
262388_AT	AT1G49320	BURP domain-containing protein
262383_AT	AT1G72940	disease resistance protein (TIR-NBS class), putative
262382_AT	AT1G72920	disease resistance protein (TIR-NBS class), putative
262381_AT	AT1G72900	disease resistance protein (TIR-NBS class), putative
262360_AT	AT1G73080	leucine-rich repeat transmembrane protein kinase, putative
262354_AT	AT1G64200	vacuolar ATP synthase subunit E, putative / V-ATPase E subunit, putative / vacuolar proton pump E subunit, putative
262325_AT	AT1G64160	disease resistance-responsive family protein / dirigent family protein
262314_AT	AT1G70810	C2 domain-containing protein
262290_AT	AT1G70985	hydroxyproline-rich glycoprotein family protein
262259_S_AT	AT1G53870	expressed protein
262232_AT	AT1G68600	expressed protein
262226_AT	AT1G53885	senescence-associated protein-related
262218_AT	AT1G74760	zinc finger (C3HC4-type RING finger) family protein
262211_AT	AT1G74930	AP2 domain-containing transcription factor, putative
262171_AT	AT1G74950	expressed protein
262159_AT	AT1G52720	expressed protein
262128_AT	AT1G52690	late embryogenesis abundant protein, putative / LEA protein, putative
262073_AT	AT1G59640	basic helix-loop-helix (bHLH) family protein
262061_AT	AT1G80110	expressed protein
262047_AT	AT1G80160	lactoylglutathione lyase family protein / glyoxalase I family protein
262038_AT	AT1G35580	beta-fructofuranosidase, putative / invertase, putative / saccharase, putative / beta-fructosidase, putative
262012_S_AT	AT1G35625	protease-associated zinc finger (C3HC4-type RING finger) family protein
262006_AT	AT1G64570	expressed protein
261957_AT	AT1G64660	Cys/Met metabolism pyridoxal-phosphate-dependent enzyme family protein
261922_AT	AT1G65890	acyl-activating enzyme 12 (AAE12)
261913_AT	AT1G65860	flavin-containing monooxygenase family protein / FMO family protein
261892_AT	AT1G80840	WRKY family transcription factor
261878_AT	AT1G50560	cytochrome P450, putative
261768_AT	AT1G15550	gibberellin 3-beta-dioxygenase / gibberellin 3 beta-hydroxylase (GA4)
261717_AT	AT1G18400	basic helix-loop-helix (bHLH) family protein
261713_AT	AT1G32640	basic helix-loop-helix (bHLH) protein (RAP-1)
261663_AT	AT1G18330	myb family transcription factor
261648_AT	AT1G27730	zinc finger (C2H2 type) family protein (ZAT10) / salt-tolerance zinc finger protein (STZ)
261619_X_AT	AT1G33130	CACTA-like transposase family (Ptta/En/Spm)
261586_AT	AT1G01640	speckle-type POZ protein-related
261571_AT	AT1G01150	expressed protein
261568_AT	AT1G01030	DNA-binding protein, putative
261567_AT	AT1G33055	expressed protein
261564_AT	AT1G01720	no apical meristem (NAM) family protein
261545_AT	AT1G63530	hypothetical protein
261541_AT	AT1G63600	protein kinase-related
261480_AT	AT1G14280	phytochrome kinase, putative
261470_AT	AT1G28370	ERF domain protein 11 (ERF11)
261459_AT	AT1G21100	O-methyltransferase, putative
261443_AT	AT1G28480	glutaredoxin family protein
261435_AT	AT1G07620	GTP1/OBG family protein
261431_AT	AT1G18710	myb family transcription factor (MYB47)
261382_AT	AT1G05470	endonuclease/exonuclease/phosphatase family protein
261336_AT	AT1G44790	ChaC-like family protein
261266_AT	AT1G26770	expansin, putative (EXP10)
261261_AT	AT1G26730	EXS family protein / ERD1/XPR1/SYG1 family protein
261226_AT	AT1G20190	expansin, putative (EXP11)
261221_AT	AT1G19960	expressed protein
261215_AT	AT1G32970	subtilase family protein
261157_AT	AT1G34510	peroxidase, putative
261150_AT	AT1G19640	S-adenosyl-L-methionine
261140_AT	AT1G19680	expressed protein
261114_AT	AT1G75390	bZIP transcription factor family protein
261106_AT	AT1G62990	homeodomain transcription factor (KNAT7)
261070_AT	AT1G07390	leucine-rich repeat family protein
261046_AT	AT1G01390	UDP-glucoronosyl/UDP-glucosyl transferase family protein
261037_AT	AT1G17420	lipoxygenase, putative
261035_AT	AT1G17390	hypothetical protein
261033_AT	AT1G17380	expressed protein
260969_AT	AT1G12240	beta-fructosidase (BFRUCT4) / beta-fructofuranosidase / invertase, vacuolar
260957_AT	AT1G06080	delta 9 desaturase (ADS1)
260914_AT	AT1G02640	glycosyl hydrolase family 3 protein
260897_AT	AT1G29330	ER lumen protein retaining receptor (ERD2) / HDEL receptor
260856_AT	AT1G21910	AP2 domain-containing transcription factor family protein
260803_AT	AT1G78340	glutathione S-transferase, putative
260783_AT	AT1G06160	ethylene-responsive factor, putative
260770_AT	AT1G49200	zinc finger (C3HC4-type RING finger) family protein
260753_AT	AT1G49230	zinc finger (C3HC4-type RING finger) family protein
260744_AT	AT1G15010	expressed protein
260741_AT	AT1G15045	hypothetical protein contains Pfam profile: PF00117 Glutamine amidotransferase class-I
260666_AT	AT1G19300	glycosyl transferase family 8 protein
260662_AT	AT1G19540	isoflavone reductase, putative
260627_AT	AT1G62310	transcription factor jumonji (jmjC) domain-containing protein
260624_AT	AT1G08100	high-affinity nitrate transporter (ACH2)
260608_AT	AT2G43870	polygalacturonase, putative / pectinase, putative
260547_AT	AT2G43550	trypsin inhibitor, putative
260546_AT	AT2G43520	trypsin inhibitor, putative
260541_AT	AT2G43530	trypsin inhibitor, putative
260431_AT	AT1G68190	zinc finger (B-box type) family protein
260429_AT	AT1G72450	expressed protein
260420_AT	AT1G69610	expressed protein
260411_AT	AT1G69890	expressed protein
260399_AT	AT1G72520	lipoxygenase, putative
260387_AT	AT1G74100	sulfotransferase family protein
260362_AT	AT1G70530	protein kinase family protein
260361_AT	AT1G69360	expressed protein
260360_AT	AT1G69370	chorismate mutase, putative
260303_AT	AT1G70520	protein kinase family protein
260287_AT	AT1G80440	kelch repeat-containing F-box family protein
260266_AT	AT1G68520	zinc finger (B-box type) family protein
260237_AT	AT1G74430	myb family transcription factor (MYB95)
260226_AT	AT1G74660	zinc finger homeobox family protein / ZF-HD homeobox family protein
260221_AT	AT1G74670	gibberellin-responsive protein, putative
260210_AT	AT1G74420	xyloglucan fucosyltransferase, putative (FUT3)
260205_AT	AT1G70700	expressed protein
260203_AT	AT1G52890	no apical meristem (NAM) family protein
260198_AT	AT1G67635	hypothetical protein
260190_AT	AT1G67560	lipoxygenase family protein
260179_AT	AT1G70690	kinase-related
260178_AT	AT1G70720	invertase/pectin methylesterase inhibitor family protein
260148_AT	AT1G52800	oxidoreductase, 2OG-Fe(II) oxygenase family protein
260134_AT	AT1G66370	myb family transcription factor (MYB113)
260101_AT	AT1G73260	trypsin and protease inhibitor family protein / Kunitz family protein
260070_AT	AT1G73830	basic helix-loop-helix (bHLH) family protein
260051_AT	AT1G78210	hydrolase, alpha/beta fold family protein
260030_AT	AT1G68880	bZIP transcription factor family protein
259996_AT	AT1G67910	expressed protein
259982_AT	AT1G76410	zinc finger (C3HC4-type RING finger) family protein
259979_AT	AT1G76600	expressed protein
259977_AT	AT1G76590	zinc-binding family protein
259930_AT	AT1G34355	forkhead-associated domain-containing protein / FHA domain-containing protein
259885_AT	AT1G76380	DNA-binding bromodomain-containing protein
259879_AT	AT1G76650	calcium-binding EF hand family protein
259878_AT	AT1G76790	O-methyltransferase family 2 protein
259870_AT	AT1G76780	expressed protein
259866_AT	AT1G76640	calmodulin-related protein, putative
259854_AT	AT1G72200	zinc finger (C3HC4-type RING finger) family protein
259848_AT	AT1G72180	leucine-rich repeat transmembrane protein kinase, putative
259846_AT	AT1G72140	proton-dependent oligopeptide transport (POT) family protein
259839_AT	AT1G52190	proton-dependent oligopeptide transport (POT) family protein
259822_AT	AT1G66230	myb family transcription factor (MYB20)
259813_AT	AT1G49860	glutathione S-transferase, putative
259802_AT	AT1G72260	thionin (THI2.1)
259790_S_AT	AT1G29430	auxin-responsive family protein
259787_AT	AT1G29460	auxin-responsive protein, putative
259784_AT	AT1G29450	auxin-responsive protein, putative
259783_AT	AT1G29510	auxin-responsive protein, putative
259773_AT	AT1G29500	auxin-responsive protein, putative
259758_S_AT	AT1G77530	O-methyltransferase family 2 protein
259751_AT	AT1G71030	myb family transcription factor
259749_AT	AT1G71100	ribose 5-phosphate isomerase-related
259735_AT	AT1G64405	expressed protein
259725_AT	AT1G61065	expressed protein
259723_AT	AT1G60960	metal transporter, putative (IRT3)
259705_AT	AT1G77450	no apical meristem (NAM) family protein
259640_AT	AT1G52400	glycosyl hydrolase family 1 protein / beta-glucosidase, putative (BG1)
259632_AT	AT1G56430	nicotianamine synthase, putative
259629_AT	AT1G56510	disease resistance protein (TIR-NBS-LRR class), putative
259609_AT	AT1G52410	caldesmon-related
259596_AT	AT1G28130	auxin-responsive GH3 family protein
259595_AT	AT1G28050	zinc finger (B-box type) family protein
259568_AT	AT1G20490	AMP-dependent synthetase and ligase family protein
259548_AT	AT1G35260	Bet v I allergen family protein
259518_AT	AT1G20510	4-coumarate--CoA ligase family protein / 4-coumaroyl-CoA synthase family protein
259443_AT	AT1G02360	chitinase, putative
259432_AT	AT1G01520	myb family transcription factor
259400_AT	AT1G17750	leucine-rich repeat transmembrane protein kinase, putative
259399_AT	AT1G17710	expressed protein
259383_AT	AT3G16470	jacalin lectin family protein
259379_AT	AT3G16350	myb family transcription factor
259373_AT	AT1G69160	expressed protein
259369_S_AT	AT1G69150	DC1 domain-containing protein
259332_AT	AT3G03830	auxin-responsive protein, putative
259331_AT	AT3G03840	auxin-responsive protein, putative
259264_AT	AT3G01260	aldose 1-epimerase family protein
259221_S_AT	AT3G03540	phosphoesterase family protein
259211_AT	AT3G09020	alpha 1,4-glycosyltransferase family protein / glycosyltransferase sugar-binding DXD motif-containing protein
259154_AT	AT3G10260	reticulon family protein
259116_AT	AT3G01350	proton-dependent oligopeptide transport (POT) family protein
259042_AT	AT3G03450	gibberellin response modulator, putative / gibberellin-responsive modulator, putative
259021_AT	AT3G07540	formin homology 2 domain-containing protein / FH2 domain-containing protein
259015_AT	AT3G07350	expressed protein
258983_AT	AT3G08860	alanine--glyoxylate aminotransferase, putative / beta-alanine-pyruvate aminotransferase, putative / AGT, putative
258982_AT	AT3G08870	lectin protein kinase, putative
258975_AT	AT3G01970	WRKY family transcription factor
258942_AT	AT3G09960	calcineurin-like phosphoesterase family protein
258941_AT	AT3G09940	monodehydroascorbate reductase, putative
258856_AT	AT3G02040	glycerophosphoryl diester phosphodiesterase family protein
258851_AT	AT3G03190	glutathione S-transferase, putative
258815_AT	AT3G04000	short-chain dehydrogenase/reductase (SDR) family protein
258787_AT	AT3G11840	U-box domain-containing protein
258757_AT	AT3G10910	zinc finger (C3HC4-type RING finger) family protein
258652_AT	AT3G09910	Ras-related GTP-binding protein, putative
258629_AT	AT3G02850	stelar K+ outward rectifier (SKOR) / potassium channel protein
258618_AT	AT3G02885	gibberellin-regulated protein 5 (GASA5) / gibberellin-responsive protein 5
258610_AT	AT3G02875	IAA-amino acid hydrolase 1 (ILR1)
258609_AT	AT3G02910	expressed protein
258586_S_AT	AT3G04320	trypsin and protease inhibitor family protein / Kunitz family protein
258581_AT	AT3G04160	expressed protein
258541_AT	AT3G07000	DC1 domain-containing protein
258523_AT	AT3G06830	pectinesterase family protein
258516_AT	AT3G06490	myb family transcription factor (MYB108)
258511_AT	AT3G06590	expressed protein
258507_AT	AT3G06500	beta-fructofuranosidase, putative / invertase, putative / saccharase, putative / beta-fructosidase, putative
258497_AT	AT3G02380	zinc finger protein CONSTANS-LIKE 2 (COL2)
258487_AT	AT3G02550	LOB domain protein 41 / lateral organ boundaries domain protein 41 (LBD41)
258468_AT	AT3G06070	expressed protein
258456_AT	AT3G22420	protein kinase family protein
258445_AT	AT3G22400	lipoxygenase, putative
258440_AT	AT3G17250	protein phosphatase 2C-related / PP2C-related
258421_AT	AT3G16690	nodulin MtN3 family protein
258395_AT	AT3G15500	no apical meristem (NAM) family protein (NAC3)
258385_AT	AT3G15510	no apical meristem (NAM) family protein (NAC2)
258370_AT	AT3G14395	expressed protein
258367_AT	AT3G14370	protein kinase family protein
258322_AT	AT3G22740	homocysteine S-methyltransferase 3 (HMT-3)
258290_AT	AT3G23460	cyclopropane fatty acid synthase-related
258277_AT	AT3G26830	cytochrome P450 71B15, putative (CYP71B15)
258264_AT	AT3G15790	methyl-CpG-binding domain-containing protein
258259_S_AT	AT3G26840	esterase/lipase/thioesterase family protein
258252_AT	AT3G15720	glycoside hydrolase family 28 protein / polygalacturonase (pectinase) family protein
258227_AT	AT3G15620	6-4 photolyase (UVR3)
258207_AT	AT3G14050	RelA/SpoT protein, putative (RSH2)
258189_AT	AT3G17860	expressed protein
258158_AT	AT3G17790	acid phosphatase type 5 (ACP5)
258116_AT	AT3G14520	terpene synthase/cyclase family protein
258100_AT	AT3G23550	MATE efflux family protein
258064_AT	AT3G14680	cytochrome P450, putative
258059_AT	AT3G29035	no apical meristem (NAM) family protein
258037_AT	AT3G21230	4-coumarate--CoA ligase, putative / 4-coumaroyl-CoA synthase, putative (4CL)
257964_AT	AT3G19850	phototropic-responsive NPH3 family protein
257947_AT	AT3G21720	isocitrate lyase, putative
257927_AT	AT3G23240	ethylene-responsive factor 1 / ethylene response factor 1 (ERF1)
257925_AT	AT3G23170	expressed protein
257919_AT	AT3G23250	myb family transcription factor (MYB15)
257917_AT	AT3G23220	ethylene-responsive element-binding protein, putative
257875_AT	AT3G17120	expressed protein
257832_AT	AT3G26740	light responsive protein-related
257763_S_AT	AT3G23110	disease resistance family protein
257690_AT	AT3G12830	auxin-responsive family protein
257654_AT	AT3G13310	DNAJ heat shock N-terminal domain-containing protein
257644_AT	AT3G25780	allene oxide cyclase, putative / early-responsive to dehydration protein, putative / ERD protein, putative
257641_S_AT	AT3G25760	early-responsive to dehydration stress protein (ERD12)
257638_AT	AT3G25820	myrcene/ocimene synthase, putative
257636_AT	AT3G26200	cytochrome P450 71B22, putative (CYP71B22)
257625_AT	AT3G26230	cytochrome P450 family protein
257623_AT	AT3G26210	cytochrome P450 71B23, putative (CYP71B23)
257619_AT	AT3G24810	kip-related protein 5 (KRP5) / cyclin-dependent kinase inhibitor 5 (ICK5)
257610_AT	AT3G13810	zinc finger (C2H2 type) family protein
257607_AT	AT3G13880	pentatricopeptide (PPR) repeat-containing protein
257604_S_AT	AT3G13830	F-box family protein
257543_AT	AT3G28960	amino acid transporter family protein
257506_AT	AT1G29440	auxin-responsive family protein
257481_AT	AT1G08430	expressed protein
257467_AT	AT1G31320	LOB domain protein 4 / lateral organ boundaries domain protein 4 (LBD4)
257441_AT	AT2G04020	GDSL-motif lipase/hydrolase family protein
257373_AT	AT2G43140	basic helix-loop-helix (bHLH) family protein
257345_S_AT	AT3G33066	gypsy-like retrotransposon family (Athila)
257325_AT	ORF113	hypothetical protein
257315_AT	AT3G30775	proline oxidase, mitochondrial / osmotic stress-responsive proline dehydrogenase (POX) (PRO1) (ERD5)
257294_AT	AT3G15570	phototropic-responsive NPH3 family protein
257264_AT	AT3G22060	receptor protein kinase-related
257162_S_AT	AT3G24290	ammonium transporter, putative
257123_AT	AT3G20030	F-box family protein
257053_AT	AT3G15210	ethylene-responsive element-binding factor 4 (ERF4)
257027_AT	AT3G19210	DNA repair protein RAD54, putative
257026_AT	AT3G19200	hypothetical protein
257022_AT	AT3G19580	zinc finger (C2H2 type) protein 2 (AZF2)
257011_AT	AT3G14070	cation exchanger, putative (CAX9)
256924_AT	AT3G29590	transferase family protein
256914_AT	AT3G23880	F-box family protein
256878_AT	AT3G26460	major latex protein-related / MLP-related
256875_AT	AT3G26330	cytochrome P450 family protein
256833_AT	AT3G22910	calcium-transporting ATPase, plasma membrane-type, putative / Ca(2+)-ATPase, putative (ACA13)
256801_AT	AT3G20940	cytochrome P450 family protein
256793_AT	AT3G22160	VQ motif-containing protein
256789_AT	AT3G13672	seven in absentia (SINA) family protein
256787_AT	AT3G13790	beta-fructosidase (BFRUCT1) / beta-fructofuranosidase / cell wall invertase
256774_AT	AT3G13760	DC1 domain-containing protein
256762_AT	AT3G25655	expressed protein
256725_AT	AT2G34070	expressed protein
256712_AT	AT2G34020	calcium-binding EF hand family protein
256650_AT	AT3G13620	amino acid permease family protein
256621_AT	AT3G24450	copper-binding family protein
256603_AT	AT3G28270	expressed protein
256601_S_AT	AT3G28290	integrin-related protein 14a
256589_AT	AT3G28740	cytochrome P450 family protein
256577_AT	AT3G28220	meprin and TRAF homology domain-containing protein / MATH domain-containing protein
256560_S_AT	AT3G31415	terpene synthase/cyclase family protein
256527_AT	AT1G66100	thionin, putative
256509_AT	AT1G75300	isoflavone reductase, putative
256489_AT	AT1G31550	GDSL-motif lipase, putative
256461_S_AT	AT4G18440	adenylosuccinate lyase, putative / adenylosuccinase, putative
256458_AT	AT1G75220	integral membrane protein, putative
256457_AT	AT1G75230	HhH-GPD base excision DNA repair family protein
256442_AT	AT3G10930	expressed protein
256382_AT	AT1G66860	expressed protein
256379_AT	AT1G66840	expressed protein
256368_AT	AT1G66800	cinnamyl-alcohol dehydrogenase family / CAD family
256356_S_AT	AT1G66500	zinc finger (C2H2-type) family protein
256337_AT	AT1G72060	expressed protein
256324_AT	AT1G66760	MATE efflux family protein
256321_AT	AT1G55020	lipoxygenase (LOX1)
256300_AT	AT1G69490	no apical meristem (NAM) family protein
256289_S_AT	AT3G12230	serine carboxypeptidase S10 family protein
256252_AT	AT3G11340	UDP-glucoronosyl/UDP-glucosyl transferase family protein
256229_AT	AT1G58200	mechanosensitive ion channel domain-containing protein / MS ion channel domain-containing protein
256208_AT	AT1G50930	hypothetical protein
256178_S_AT	AT1G51780	IAA-amino acid hydrolase 5 / auxin conjugate hydrolase (ILL5)
256159_AT	AT1G30135	expressed protein
256137_AT	AT1G48690	auxin-responsive GH3 family protein
256103_AT	AT1G13540	expressed protein
256093_AT	AT1G20823	zinc finger (C3HC4-type RING finger) family protein
256060_AT	AT1G07050	CONSTANS-like protein-related
256053_AT	AT1G07260	UDP-glucoronosyl/UDP-glucosyl transferase family protein
256039_AT	AT1G19190	expressed protein
256017_AT	AT1G19180	expressed protein
255935_AT	AT1G12700	helicase domain-containing protein / pentatricopeptide (PPR) repeat-containing protein
255900_AT	AT1G17830	expressed protein
255881_AT	AT1G67070	phosphomannose isomerase, putative (DIN9)
255877_AT	AT2G40460	proton-dependent oligopeptide transport (POT) family protein
255872_AT	AT2G30360	CBL-interacting protein kinase 11 (CIPK11)
255822_AT	AT2G40610	expansin, putative (EXP8)
255795_AT	AT2G33380	calcium-binding RD20 protein (RD20)
255786_AT	AT1G19670	coronatine-responsive protein / coronatine-induced protein 1 (CORI1)
255753_AT	AT1G18570	myb family transcription factor (MYB51)
255728_AT	AT1G25500	choline transporter-related
255723_AT	AT3G29575	expressed protein
255645_AT	AT4G00880	auxin-responsive family protein
255604_AT	AT4G01080	expressed protein
255575_AT	AT4G01430	nodulin MtN21 family protein
255527_AT	AT4G02360	expressed protein
255511_AT	AT4G02075	zinc finger (C3HC4-type RING finger) family protein
255437_AT	AT4G03060	2-oxoglutarate-dependent dioxygenase, putative (AOP2)
255347_AT	AT4G03810	copia-like retrotransposon family
255298_AT	AT4G04840	methionine sulfoxide reductase domain-containing protein / SeIR domain-containing protein
255202_AT	AT4G07500	hypothetical protein
255156_AT	AT4G07780	gypsy-like retrotransposon family (Athila)
255132_AT	AT4G08170	inositol 1,3,4-trisphosphate 5/6-kinase family protein
255065_S_AT	AT4G08870	arginase, putative
255038_AT	AT4G09510	beta-fructofuranosidase, putative / invertase, putative / saccharase, putative / beta-fructosidase, putative
255032_AT	AT4G09500	glycosyltransferase family protein
255016_AT	AT4G10120	sucrose-phosphate synthase, putative
254996_AT	AT4G10390	protein kinase family protein
254975_AT	AT4G10500	oxidoreductase, 2OG-Fe(II) oxygenase family protein
254934_AT	AT4G11140	AP2 domain-containing transcription factor, putative
254915_S_AT	AT4G11310	cysteine proteinase, putative
254907_AT	AT4G11190	disease resistance-responsive family protein / dirigent family protein
254869_AT	AT4G11890	protein kinase family protein
254837_AT	AT4G12360	protease inhibitor/seed storage/lipid transfer protein (LTP) family protein
254833_S_AT	AT4G12280	copper amine oxidase family protein
254806_AT	AT4G12430	trehalose-6-phosphate phosphatase, putative
254783_AT	AT4G12830	hydrolase, alpha/beta fold family protein
254773_AT	AT4G13410	glycosyl transferase family 2 protein
254767_S_AT	AT4G13290	cytochrome P450 71A19, putative (CYP71A19)
254766_AT	AT4G13280	terpene synthase/cyclase family protein
254720_AT	AT4G13610	DNA (cytosine-5-)-methyltransferase, putative
254681_AT	AT4G18140	NLI interacting factor (NIF) family protein
254651_AT	AT4G18160	outward rectifying potassium channel, putative (KCO6)
254564_AT	AT4G19170	9-cis-epoxycarotenoid dioxygenase, putative / neoxanthin cleavage enzyme, putative / carotenoid cleavage dioxygenase, putative
254550_AT	AT4G19690	iron-responsive transporter (IRT1)
254514_AT	AT4G20250	hypothetical protein
254497_AT	AT4G20080	C2 domain-containing protein
254409_AT	AT4G21400	protein kinase family protein
254396_AT	AT4G21680	proton-dependent oligopeptide transport (POT) family protein
254389_S_AT	AT4G21910	MATE efflux family protein
254387_AT	AT4G21850	methionine sulfoxide reductase domain-containing protein / SeIR domain-containing protein
254385_S_AT	AT4G21830	methionine sulfoxide reductase domain-containing protein / SeIR domain-containing protein
254380_AT	AT4G21865	expressed protein
254333_AT	AT4G22753	sterol desaturase family protein
254326_AT	AT4G22610	protease inhibitor/seed storage/lipid transfer protein (LTP) family protein
254321_AT	AT4G22590	trehalose-6-phosphate phosphatase, putative
254283_S_AT	AT4G22870	leucoanthocyanidin dioxygenase, putative / anthocyanidin synthase, putative
254269_AT	AT4G23050	protein kinase, putative
254265_S_AT	AT4G23140	receptor-like protein kinase 5 (RLK5)
254256_AT	AT4G23180	receptor-like protein kinase 4, putative (RLK4)
254255_AT	AT4G23220	protein kinase family protein
254232_AT	AT4G23600	coronatine-responsive tyrosine aminotransferase / tyrosine transaminase
254231_AT	AT4G23810	WRKY family transcription factor
254186_AT	AT4G24010	cellulose synthase family protein
254163_S_AT	AT4G24340	phosphorylase family protein
254150_AT	AT4G24350	phosphorylase family protein
254134_AT	AT4G24830	arginosuccinate synthase family
254095_AT	AT4G25140	glycine-rich protein / oleosin
254042_AT	AT4G25810	xyloglucan
254024_AT	AT4G25780	pathogenesis-related protein, putative
254022_AT	AT4G25750	ABC transporter family protein
254016_AT	AT4G26150	zinc finger (GATA type) family protein
253971_AT	AT4G26530	fructose-bisphosphate aldolase, putative
253908_AT	AT4G27260	auxin-responsive GH3 family protein
253879_S_AT	AT4G27570	glycosyltransferase family protein
253872_AT	AT4G27410	no apical meristem (NAM) family protein (RD26)
253842_AT	AT4G27860	integral membrane family protein
253812_AT	AT4G28240	wound-responsive protein-related
253808_AT	AT4G28300	hydroxyproline-rich glycoprotein family protein
253752_AT	AT4G28910	expressed protein
253708_AT	AT4G29210	gamma-glutamyltranspeptidase family protein
253697_AT	AT4G29700	type I phosphodiesterase/nucleotide pyrophosphatase family protein
253684_AT	AT4G29690	type I phosphodiesterase/nucleotide pyrophosphatase family protein
253666_AT	AT4G30270	MERI-5 protein (MERI-5) (MERI5B) / endo-xyloglucan transferase / xyloglucan endo-1,4-beta-D-glucanase (SEN4)
253665_AT	AT4G30230	hypothetical protein
253657_AT	AT4G30110	ATPase E1-E2 type family protein / haloacid dehalogenase-like hydrolase family protein / heavy-metal-associated domain-containing protein
253619_AT	AT4G30460	glycine-rich protein
253608_AT	AT4G30290	xyloglucan
253606_AT	AT4G30530	defense-related protein, putative
253534_AT	AT4G31500	cytochrome P450 83B1 (CYP83B1)
253510_AT	AT4G31730	expressed protein
253502_AT	AT4G31940	cytochrome P450, putative
253485_AT	AT4G31800	WRKY family transcription factor
253483_AT	AT4G31910	transferase family protein
253437_AT	AT4G32460	expressed protein
253423_AT	AT4G32280	auxin-responsive AUX/IAA family protein
253416_AT	AT4G33070	pyruvate decarboxylase, putative
253305_AT	AT4G33666	expressed protein
253271_S_AT	AT4G34210	E3 ubiquitin ligase SCF complex subunit SKP1/ASK1 (At11), putative
253259_AT	AT4G34410	AP2 domain-containing transcription factor, putative
253255_AT	AT4G34760	auxin-responsive family protein
253253_AT	AT4G34750	auxin-responsive protein, putative / small auxin up RNA (SAUR_E)
253227_AT	AT4G35030	protein kinase family protein
253207_AT	AT4G34770	auxin-responsive family protein
253203_AT	AT4G34710	arginine decarboxylase 2 (SPE2)
253172_AT	AT4G35060	heavy-metal-associated domain-containing protein / copper chaperone (CCH)-related
253162_AT	AT4G35630	phosphoserine aminotransferase, chloroplast (PSAT)
253104_AT	AT4G36010	pathogenesis-related thaumatin family protein
253103_AT	AT4G36110	auxin-responsive protein, putative
253101_AT	AT4G37430	cytochrome P450 81F1 (CYP81F1) (CYP91A2)
253100_AT	AT4G37400	cytochrome P450 family protein
253070_AT	AT4G37850	basic helix-loop-helix (bHLH) family protein
253060_AT	AT4G37710	VQ motif-containing protein
252970_AT	AT4G38850	auxin-responsive protein / small auxin up RNA (SAUR-AC1)
252965_AT	AT4G38860	auxin-responsive protein, putative
252921_AT	AT4G39030	enhanced disease susceptibility 5 (EDS5) / salicylic acid induction deficient 1 (SID1)
252896_AT	AT4G39480	cytochrome P450 family protein
252870_AT	AT4G39940	adenylylsulfate kinase 2 (AKN2)
252831_AT	AT4G39980	2-dehydro-3-deoxyphosphoheptonate aldolase 1 / 3-deoxy-D-arabino-heptulosonate 7-phosphate synthase 1 / DAHP synthetase 1 (DHS1)
252827_AT	AT4G39950	cytochrome P450 79B2, putative (CYP79B2)
252775_S_AT	AT3G42930	CACTA-like transposase family (Ptta/En/Spm)
252773_AT	AT3G42910	expressed protein
252770_AT	AT3G42860	zinc knuckle (CCHC-type) family protein
252730_AT	AT3G43110	expressed protein
252708_AT	AT3G43820	pseudogene, copper amine oxidase protein family
252679_AT	AT3G44260	CCR4-NOT transcription complex protein, putative
252677_AT	AT3G44320	nitrilase 3 (NIT3)
252652_AT	AT3G44720	prephenate dehydratase family protein
252626_AT	AT3G44940	expressed protein
252611_AT	AT3G45130	cycloartenol synthase, putative / 2,3-epoxysqualene--cycloartenol cyclase, putative / (S)-2,3-epoxysqualene mutase, putative
252597_AT	AT3G45360	hypothetical protein
252573_AT	AT3G45260	zinc finger (C2H2 type) family protein
252572_AT	AT3G45290	seven transmembrane MLO family protein / MLO-like protein 3 (MLO3)
252563_AT	AT3G45970	expansin family protein (EXPL1)
252532_AT	AT3G46570	glycosyl hydrolase family 17 protein
252531_AT	AT3G46520	actin 12 (ACT12)
252520_AT	AT3G46370	leucine-rich repeat protein kinase, putative
252510_AT	AT3G46270	receptor protein kinase-related
252488_AT	AT3G46700	UDP-glucoronosyl/UDP-glucosyl transferase family protein
252487_AT	AT3G46660	UDP-glucoronosyl/UDP-glucosyl transferase family protein
252437_AT	AT3G47380	invertase/pectin methylesterase inhibitor family protein
252435_AT	AT3G47320	hypothetical protein
252415_AT	AT3G47340	asparagine synthetase 1 (glutamine-hydrolyzing) / glutamine-dependent asparagine synthetase 1 (ASN1)
252384_AT	AT3G47790	ABC transporter family protein
252377_AT	AT3G47960	proton-dependent oligopeptide transport (POT) family protein
252367_AT	AT3G48360	speckle-type POZ protein-related
252365_AT	AT3G48350	cysteine proteinase, putative
252340_AT	AT3G48920	myb family transcription factor (MYB45)
252322_AT	AT3G48550	expressed protein
252300_AT	AT3G49160	pyruvate kinase family protein
252265_AT	AT3G49620	2-oxoacid-dependent oxidase, putative (DIN11)
252244_AT	AT3G50130	expressed protein
252243_AT	AT3G50120	expressed protein
252214_AT	AT3G50260	AP2 domain-containing transcription factor, putative
252212_AT	AT3G50310	protein kinase-related
252202_AT	AT3G50300	transferase family protein
252200_AT	AT3G50280	transferase family protein
252167_AT	AT3G50560	short-chain dehydrogenase/reductase (SDR) family protein
252160_AT	AT3G50570	hydroxyproline-rich glycoprotein family protein
252136_AT	AT3G50770	calmodulin-related protein, putative
252114_AT	AT3G51450	strictosidine synthase family protein
252097_AT	AT3G51090	expressed protein
252084_AT	AT3G51970	long-chain-alcohol O-fatty-acyltransferase family protein / wax synthase family protein
252076_AT	AT3G51660	macrophage migration inhibitory factor family protein / MIF family protein
252057_AT	AT3G52480	expressed protein
252037_AT	AT3G51920	calmodulin-9 (CAM9)
252014_AT	AT3G52870	calmodulin-binding family protein
252011_AT	AT3G52720	carbonic anhydrase family protein
251977_AT	AT3G53250	auxin-responsive family protein
251950_AT	AT3G53600	zinc finger (C2H2 type) family protein
251925_AT	AT3G54000	expressed protein
251916_AT	AT3G53960	proton-dependent oligopeptide transport (POT) family protein
251847_AT	AT3G54640	tryptophan synthase, alpha subunit (TSA1)
251811_AT	AT3G54990	AP2 domain-containing transcription factor, putative
251785_AT	AT3G55130	ABC transporter family protein
251780_S_AT	AT3G55310	short-chain dehydrogenase/reductase (SDR) family protein
251770_AT	AT3G55970	oxidoreductase, 2OG-Fe(II) oxygenase family protein
251769_AT	AT3G55950	protein kinase family protein
251746_AT	AT3G56060	glucose-methanol-choline (GMC) oxidoreductase family protein
251725_AT	AT3G56260	expressed protein
251722_AT	AT3G56200	amino acid transporter family protein
251698_AT	AT3G56610	expressed protein
251677_AT	AT3G56980	basic helix-loop-helix (bHLH) family protein
251642_AT	AT3G57520	alkaline alpha galactosidase, putative
251633_AT	AT3G57460	expressed protein
251502_AT	AT3G59130	DC1 domain-containing protein
251487_AT	AT3G59760	cysteine synthase, mitochondrial, putative / O-acetylserine (thiol)-lyase, putative / O-acetylserine sulfhydrylase, putative
251482_S_AT	AT3G59740	receptor lectin kinase 3 (lecRK3)
251481_AT	AT3G59730	receptor lectin kinase, putative
251480_AT	AT3G59710	short-chain dehydrogenase/reductase (SDR) family protein
251466_AT	AT3G59340	expressed protein
251443_AT	AT3G59940	kelch repeat-containing F-box family protein
251436_AT	AT3G59900	expressed protein
251423_AT	AT3G60550	cyclin family protein
251420_AT	AT3G60490	AP2 domain-containing transcription factor TINY, putative
251402_AT	AT3G60290	oxidoreductase, 2OG-Fe(II) oxygenase family protein
251356_AT	AT3G61060	F-box family protein / lectin-related
251335_AT	AT3G61400	2-oxoglutarate-dependent dioxygenase, putative
251296_AT	AT3G62010	expressed protein
251221_AT	AT3G62550	universal stress protein (USP) family protein
251169_AT	AT3G63210	expressed protein
251160_AT	AT3G63240	endonuclease/exonuclease/phosphatase family protein
251154_AT	AT3G63110	adenylate isopentenyltransferase 3 / cytokinin synthase (IPT3)
251106_AT	AT5G01500	mitochondrial substrate carrier family protein
251072_AT	AT5G01740	expressed protein
251063_AT	AT5G01850	protein kinase, putative
251028_AT	AT5G02230	haloacid dehalogenase-like hydrolase family protein
251026_AT	AT5G02200	phytochrome A specific signal transduction component-related
251023_AT	AT5G02170	amino acid transporter family protein
251017_AT	AT5G02760	protein phosphatase 2C family protein / PP2C family protein
251013_AT	AT5G02540	short-chain dehydrogenase/reductase (SDR) family protein
250960_AT	AT5G02940	expressed protein
250927_AT	AT5G03270	expressed protein
250793_AT	AT5G05600	oxidoreductase, 2OG-Fe(II) oxygenase family protein
250786_AT	AT5G05540	exonuclease family protein
250738_AT	AT5G05730	anthranilate synthase, alpha subunit, component I-1 (ASA1)
250680_AT	AT5G06570	expressed protein
250669_AT	AT5G06870	polygalacturonase inhibiting protein 2 (PGIP2)
250662_AT	AT5G07010	sulfotransferase family protein
250633_AT	AT5G07460	peptide methionine sulfoxide reductase, putative
250616_AT	AT5G07280	leucine-rich repeat protein kinase, putative / extra sporogenous cells (ESP)
250597_AT	AT5G07680	no apical meristem (NAM) family protein
250582_AT	AT5G07580	ethylene-responsive element-binding family protein
250580_AT	AT5G07440	glutamate dehydrogenase 2 (GDH2)
250483_AT	AT5G10300	hydrolase, alpha/beta fold family protein
250472_AT	AT5G10210	expressed protein
250455_AT	AT5G09980	expressed protein
250446_AT	AT5G10770	chloroplast nucleoid DNA-binding protein, putative
250445_AT	AT5G10760	aspartyl protease family protein
250327_AT	AT5G12050	expressed protein
250292_AT	AT5G13220	expressed protein
250287_AT	AT5G13330	AP2 domain-containing transcription factor family protein
250279_AT	AT5G13200	GRAM domain-containing protein / ABA-responsive protein-related
250264_AT	AT5G12890	UDP-glucoronosyl/UDP-glucosyl transferase family protein
250259_AT	AT5G13800	hydrolase, alpha/beta fold family protein
250240_AT	AT5G13590	expressed protein
250167_AT	AT5G15310	myb family transcription factor
250161_AT	AT5G15240	amino acid transporter family protein
250149_AT	AT5G14700	cinnamoyl-CoA reductase-related
250142_AT	AT5G14650	polygalacturonase, putative / pectinase, putative
250111_AT	AT5G16290	acetolactate synthase small subunit, putative
250083_AT	AT5G17220	glutathione S-transferase, putative
250054_AT	AT5G17860	cation exchanger, putative (CAX7)
250012_X_AT	AT5G18060	auxin-responsive protein, putative
250007_AT	AT5G18670	beta-amylase, putative (BMY3) / 1,4-alpha-D-glucan maltohydrolase, putative
249979_S_AT	AT5G18860	inosine-uridine preferring nucleoside hydrolase family protein
249971_AT	AT5G19110	extracellular dermal glycoprotein-related / EDGP-related
249970_AT	AT5G19100	extracellular dermal glycoprotein-related / EDGP-related
249947_AT	AT5G19200	short-chain dehydrogenase/reductase (SDR) family protein
249928_AT	AT5G22250	CCR4-NOT transcription complex protein, putative
249917_AT	AT5G22460	esterase/lipase/thioesterase family protein
249910_AT	AT5G22630	prephenate dehydratase family protein
249902_AT	AT5G22680	hypothetical protein
249893_AT	AT5G22555	expressed protein
249890_AT	AT5G22570	WRKY family transcription factor
249862_AT	AT5G22920	zinc finger (C3HC4-type RING finger) family protein
249817_AT	AT5G23820	MD-2-related lipid recognition domain-containing protein / ML domain-containing protein
249812_AT	AT5G23830	MD-2-related lipid recognition domain-containing protein / ML domain-containing protein
249806_AT	AT5G23850	expressed protein
249801_AT	AT5G23580	calcium-dependent protein kinase 9 (CDPK9)
249791_AT	AT5G23810	amino acid transporter family protein
249790_AT	AT5G24290	integral membrane family protein
249773_AT	AT5G24140	squalene monooxygenase 2 / squalene epoxidase 2 (SQP2)
249770_AT	AT5G24110	WRKY family transcription factor
249765_AT	AT5G24030	C4-dicarboxylate transporter/malic acid transport family protein
249732_AT	AT5G24420	glucosamine/galactosamine-6-phosphate isomerase-related
249728_AT	AT5G24390	RabGAP/TBC domain-containing protein
249692_S_AT	AT5G36670	PHD finger family protein
249686_AT	AT5G36140	cytochrome P450-related
249675_AT	AT5G35940	jacalin lectin family protein
249667_AT	AT5G35850	unknown protein
249642_AT	AT5G36960	expressed protein
249639_AT	AT5G36930	disease resistance protein (TIR-NBS-LRR class), putative
249626_AT	AT5G37540	aspartyl protease family protein
249600_S_AT	AT5G38000	NADP-dependent oxidoreductase, putative
249541_AT	AT5G38130	transferase family protein
249527_AT	AT5G38710	proline oxidase, putative / osmotic stress-responsive proline dehydrogenase, putative
249477_S_AT	AT5G38930	germin-like protein, putative
249425_AT	AT5G39790	5'-AMP-activated protein kinase beta-1 subunit-related
249418_AT	AT5G39780	'putative protein predicted protein, Arabidopsis thaliana'
249409_AT	AT5G40340	PWWP domain-containing protein
249406_AT	AT5G40210	nodulin MtN21 family protein
249364_AT	AT5G40590	DC1 domain-containing protein
249349_AT	AT5G40350	myb family transcription factor (MYB24)
249346_AT	AT5G40780	lysine and histidine specific transporter, putative
249288_AT	AT5G41050	expressed protein
249252_AT	AT5G42010	WD-40 repeat family protein
249215_AT	AT5G42800	dihydroflavonol 4-reductase (dihydrokaempferol 4-reductase) (DFR)
249208_AT	AT5G42650	allene oxide synthase (AOS) / hydroperoxide dehydrase / cytochrome P450 74A (CYP74A)
249205_AT	AT5G42600	pentacyclic triterpene synthase, putative
249203_AT	AT5G42590	cytochrome P450 71A16, putative (CYP71A16)
249202_AT	AT5G42580	cytochrome P450 family protein
249139_AT	AT5G43170	zinc finger (C2H2 type) protein 3 (AZF3)
249102_AT	AT5G43590	patatin, putative
249101_AT	AT5G43580	protease inhibitor, putative
249097_AT	AT5G43520	DC1 domain-containing protein
249090_AT	AT5G43745	phosphotransferase-related
249071_AT	AT5G44050	MATE efflux family protein
249065_AT	AT5G44260	zinc finger (CCCH-type) family protein
249042_AT	AT5G44350	ethylene-responsive nuclear protein -related
249025_AT	AT5G44720	molybdenum cofactor sulfurase family protein
249008_AT	AT5G44680	methyladenine glycosylase family protein
248978_AT	AT5G45070	disease resistance protein (TIR class), putative
248964_AT	AT5G45340	cytochrome P450 family protein
248939_AT	AT5G45790	expressed protein
248910_AT	AT5G45820	CBL-interacting protein kinase 20 (CIPK20)
248895_AT	AT5G46330	leucine-rich repeat transmembrane protein kinase, putative
248855_AT	AT5G46590	no apical meristem (NAM) family protein
248801_AT	AT5G47370	homeobox-leucine zipper protein 2 (HAT2) / HD-ZIP protein 2
248794_AT	AT5G47220	ethylene-responsive element-binding factor 2 (ERF2)
248793_AT	AT5G47240	MutT/nudix family protein
248777_AT	AT5G47920	expressed protein
248772_AT	AT5G47800	phototropic-responsive NPH3 family protein
248770_AT	AT5G47740	expressed protein
248759_AT	AT5G47610	zinc finger (C3HC4-type RING finger) family protein
248719_AT	AT5G47910	respiratory burst oxidase protein D (RbohD) / NADPH oxidase
248708_AT	AT5G48560	basic helix-loop-helix (bHLH) family protein
248625_AT	AT5G48880	acetyl-CoA C-acyltransferase 1 / 3-ketoacyl-CoA thiolase 1 (PKT1)
248623_AT	AT5G49170	expressed protein
248592_AT	AT5G49280	hydroxyproline-rich glycoprotein family protein
248566_S_AT	AT5G49730	ferric reductase-like transmembrane component family protein
248564_AT	AT5G49700	DNA-binding protein-related
248520_AT	AT5G50600	short-chain dehydrogenase/reductase (SDR) family protein
248509_AT	AT5G50335	expressed protein
248423_AT	AT5G51670	expressed protein
248395_AT	AT5G52120	F-box family protein / SKP1 interacting partner 3-related
248353_AT	AT5G52320	cytochrome P450, putative
248311_AT	AT5G52570	beta-carotene hydroxylase, putative
248293_AT	AT5G53050	hydrolase, alpha/beta fold family protein
248273_AT	AT5G53500	WD-40 repeat family protein
248246_AT	AT5G53200	myb family transcription factor (TRIPTYCHON)
248230_AT	AT5G53830	VQ motif-containing protein
248226_AT	AT5G53750	expressed protein
248209_AT	AT5G53990	glycosyltransferase family protein
248208_AT	AT5G53980	homeobox-leucine zipper family protein
248205_AT	AT5G54300	expressed protein
248203_AT	AT5G54230	myb family transcription factor (MYB49)
248199_AT	AT5G54170	expressed protein
248185_AT	AT5G54060	glycosyltransferase family protein
248183_AT	AT5G54040	DC1 domain-containing protein
248138_AT	AT5G54960	pyruvate decarboxylase, putative
248091_AT	AT5G55120	expressed protein
248028_AT	AT5G55620	expressed protein
248011_AT	AT5G56300	S-adenosyl-L-methionine
247986_AT	AT5G56880	expressed protein
247951_AT	AT5G57240	oxysterol-binding family protein
247946_AT	AT5G57180	expressed protein
247940_AT	AT5G57190	phosphatidylserine decarboxylase, putative
247933_AT	AT5G56980	expressed protein
247880_AT	AT5G57780	expressed protein
247878_AT	AT5G57760	expressed protein
247864_S_AT	AT5G57890	anthranilate synthase beta subunit, putative
247850_AT	AT5G58150	leucine-rich repeat transmembrane protein kinase, putative
247819_AT	AT5G58350	protein kinase family protein
247775_AT	AT5G58690	phosphoinositide-specific phospholipase C family protein
247727_AT	AT5G59490	haloacid dehalogenase-like hydrolase family protein
247726_AT	AT5G59430	telomere repeat-binding protein 1 (TRP1)
247704_AT	AT5G59515	Expressed protein ; supported by full-length cDNA: Ceres: 157709.
247693_AT	AT5G59730	exocyst subunit EXO70 family protein
247655_AT	AT5G59820	zinc finger (C2H2 type) family protein (ZAT12)
247638_AT	AT5G60490	fasciclin-like arabinogalactan-protein (FLA12)
247626_AT	AT5G60300	lectin protein kinase family protein
247605_AT	AT5G60970	TCP family transcription factor, putative
247600_AT	AT5G60890	receptor-like protein kinase (ATR1) (MYB34)
247585_AT	AT5G60680	expressed protein
247582_AT	AT5G60760	2-phosphoglycerate kinase-related
247573_AT	AT5G61160	transferase family protein
247498_AT	AT5G61810	mitochondrial substrate carrier family protein
247492_AT	AT5G61890	AP2 domain-containing transcription factor family protein
247478_AT	AT5G62360	invertase/pectin methylesterase inhibitor family protein
247474_AT	AT5G62280	expressed protein
247463_AT	AT5G62210	embryo-specific protein-related
247360_AT	AT5G63450	cytochrome P450, putative
247326_AT	AT5G64110	peroxidase, putative
247312_AT	AT5G63970	copine-related
247293_AT	AT5G64510	expressed protein
247282_AT	AT5G64240	latex-abundant family protein (AMC3) / caspase family protein
247248_AT	AT5G64560	magnesium transporter CorA-like family protein (MRS2-2)
247215_AT	AT5G64905	expressed protein
247213_AT	AT5G64900	expressed protein
247199_AT	AT5G65210	bZIP family transcription factor (TGA1)
247193_AT	AT5G65380	ripening-responsive protein, putative
247175_AT	AT5G65280	lanthionine synthetase C-like family protein
247165_AT	AT5G65790	myb family transcription factor (MYB68)
247059_AT	AT5G66690	UDP-glucoronosyl/UDP-glucosyl transferase family protein
247047_AT	AT5G66650	expressed protein
247044_AT	AT5G66850	protein kinase family protein
247040_AT	AT5G67150	transferase family protein
247030_AT	AT5G67210	expressed protein
247026_AT	AT5G67080	protein kinase family protein
247013_AT	AT5G67480	TAZ zinc finger family protein / BTB/POZ domain-containing protein
246987_AT	AT5G67300	myb family transcription factor
246968_AT	AT5G24870	zinc finger (C3HC4-type RING finger) family protein
246933_AT	AT5G25160	zinc finger (C2H2 type) family protein (ZFP3)
246932_AT	AT5G25190	ethylene-responsive element-binding protein, putative
246922_AT	AT5G25110	CBL-interacting protein kinase 25 (CIPK25)
246917_AT	AT5G25280	serine-rich protein-related
246903_AT	AT5G25750	hypothetical protein
246884_AT	AT5G26220	ChaC-like family protein
246831_AT	AT5G26340	hexose transporter, putative
246826_AT	AT5G26310	UDP-glucoronosyl/UDP-glucosyl transferase family protein
246785_AT	AT5G27380	glutathione synthetase (GSH2)
246779_AT	AT5G27520	mitochondrial substrate carrier family protein
246724_AT	AT5G29000	myb family transcription factor
246682_AT	AT5G33290	exostosin family protein
246666_AT	AT5G34830	expressed protein
246661_AT	AT5G35280	hypothetical protein
246620_AT	AT5G36220	cytochrome P450 81D1 (CYP81D1) (CYP91A1)
246602_AT	AT1G31700	'copper amine oxidase, putative similar to copper amine oxidase GI:685197 from [Pisum sativum]'
246601_AT	AT1G31710	copper amine oxidase, putative
246584_AT	AT5G14730	expressed protein
246566_AT	AT5G14940	proton-dependent oligopeptide transport (POT) family protein
246522_AT	AT5G15830	bZIP transcription factor family protein
246494_AT	AT5G16190	glycosyl transferase family 2 protein
246487_AT	AT5G16030	expressed protein
246432_AT	AT5G17490	gibberellin response modulator, putative / gibberellin-responsive modulator, putative
246430_AT	AT5G17470	calmodulin-related protein, putative
246394_AT	AT1G58160	jacalin lectin family protein
246340_S_AT	AT3G44860	S-adenosyl-L-methionine
246275_AT	AT4G36540	basic helix-loop-helix (bHLH) family protein
246270_AT	AT4G36500	expressed protein
246197_AT	AT4G37010	caltractin, putative / centrin, putative
246142_AT	AT5G19970	expressed protein
246093_AT	AT5G20550	oxidoreductase, 2OG-Fe(II) oxygenase family protein
246071_AT	AT5G20150	SPX (SYG1/Pho81/XPR1) domain-containing protein
246001_AT	AT5G20790	expressed protein
246000_AT	AT5G20820	auxin-responsive protein-related
245955_AT	AT5G28510	glycosyl hydrolase family 1 protein
245953_AT	AT5G28520	jacalin lectin family protein
245944_AT	AT5G19520	mechanosensitive ion channel domain-containing protein / MS ion channel domain-containing protein
245928_S_AT	AT5G24780	vegetative storage protein 1 (VSP1)
245906_AT	AT5G11070	expressed protein
245855_AT	AT5G13550	sulfate transporter family protein
245835_AT	AT1G42190	hypothetical protein
245753_AT	AT1G35143	hypothetical protein
245734_AT	AT1G73480	hydrolase, alpha/beta fold family protein
245731_AT	AT1G73500	mitogen-activated protein kinase kinase (MAPKK), putative (MKK9)
245728_AT	AT1G73340	cytochrome P450 family protein
245713_AT	AT5G04370	S-adenosyl-L-methionine
245711_AT	AT5G04340	zinc finger (C2H2 type) family protein
245710_AT	AT5G04330	cytochrome P450, putative / ferulate-5-hydroxylase, putative
245696_AT	AT5G04190	phytochrome kinase substrate-related
245689_AT	AT5G04120	phosphoglycerate/bisphosphoglycerate mutase family protein
245662_AT	AT1G28190	expressed protein
245628_AT	AT1G56650	myb family transcription factor (MYB75)
245624_AT	AT4G14090	UDP-glucoronosyl/UDP-glucosyl transferase family protein
245584_AT	AT4G14940	copper amine oxidase, putative
245567_AT	AT4G14630	germin-like protein (GLP9)
245550_AT	AT4G15330	cytochrome P450 family protein
245537_AT	AT4G15190	hypothetical protein
245531_AT	AT4G15100	serine carboxypeptidase S10 family protein
245511_AT	AT4G15760	monooxygenase, putative (MO1)
245504_AT	AT4G15660	glutaredoxin family protein
245440_AT	AT4G16680	RNA helicase, putative
245422_AT	AT4G17470	palmitoyl protein thioesterase family protein
245402_AT	AT4G17585	hypothetical protein
245369_AT	AT4G15975	zinc finger (C3HC4-type RING finger) family protein
245352_AT	AT4G15490	UDP-glucoronosyl/UDP-glucosyl transferase family protein
245275_AT	AT4G15210	beta-amylase (BMY1) / 1,4-alpha-D-glucan maltohydrolase
245265_AT	AT4G14400	ankyrin repeat family protein
245258_AT	AT4G15340	pentacyclic triterpene synthase (04C11)
245254_AT	AT4G14680	sulfate adenylyltransferase 3 / ATP-sulfurylase 3 (APS3)
245253_AT	AT4G15440	hydroperoxide lyase (HPL1)
245252_AT	AT4G17500	ethylene-responsive element-binding protein 1 (ERF1) / EREBP-2 protein
245244_AT	AT1G44350	IAA-amino acid hydrolase 6, putative (ILL6) / IAA-Ala hydrolase, putative
245226_AT	AT3G29970	germination protein-related
245209_AT	AT5G12340	expressed protein
245196_AT	AT1G67750	pectate lyase family protein
245136_AT	AT2G45210	auxin-responsive protein-related
245090_AT	AT2G40900	nodulin MtN21 family protein
245076_AT	AT2G23170	auxin-responsive GH3 family protein
245060_AT	AT2G39770	GDP-mannose pyrophosphorylase (GMP1)
245041_AT	AT2G26530	expressed protein
245038_AT	AT2G26560	patatin, putative
245033_AT	AT2G26380	disease resistance protein-related / LRR protein-related
244955_AT	ORF127	hypothetical protein

## Sheet: IAA responses
regulated all IAA
Affy ID	AGI	Description
267614_AT	AT2G26710	cytochrome P450, putative
267451_AT	AT2G33710	AP2 domain-containing transcription factor family protein
267418_AT	AT2G35000	zinc finger (C3HC4-type RING finger) family protein
267372_AT	AT2G26290	protein kinase, putative
267357_AT	AT2G40000	expressed protein
267337_AT	AT2G39980	transferase family protein
267300_AT	AT2G30140	UDP-glucoronosyl/UDP-glucosyl transferase family protein
267250_AT	AT2G23060	GCN5-related N-acetyltransferase (GNAT) family protein
267202_S_AT	AT2G31030	oxysterol-binding family protein
267139_S_AT	AT2G38220	expressed protein
267137_AT	AT2G23410	dehydrodolichyl diphosphate synthase / DEDOL-PP synthase (DPS)
267028_AT	AT2G38470	WRKY family transcription factor
267008_AT	AT2G39350	ABC transporter family protein
266996_AT	AT2G34490	cytochrome P450 family protein
266983_AT	AT2G39400	hydrolase, alpha/beta fold family protein
266974_AT	AT2G39370	expressed protein
266908_AT	AT2G34650	protein kinase PINOID (PID)
266832_AT	AT2G30040	protein kinase family protein
266830_AT	AT2G22810	1-aminocyclopropane-1-carboxylate synthase 4 / ACC synthase 4 (ACS4)
266828_AT	AT2G22930	glycosyltransferase family protein
266821_AT	AT2G44840	ethylene-responsive element-binding protein, putative
266820_AT	AT2G44940	AP2 domain-containing transcription factor TINY, putative
266800_AT	AT2G22880	VQ motif-containing protein
266761_AT	AT2G47130	short-chain dehydrogenase/reductase (SDR) family protein
266737_AT	AT2G47140	short-chain dehydrogenase/reductase (SDR) family protein
266711_AT	AT2G46740	FAD-binding domain-containing protein
266669_AT	AT2G29750	UDP-glucoronosyl/UDP-glucosyl transferase family protein
266611_AT	AT2G14960	auxin-responsive GH3 family protein
266526_AT	AT2G16980	expressed protein
266507_AT	AT2G47860	phototropic-responsive NPH3 family protein
266503_AT	AT2G47780	rubber elongation factor (REF) protein-related
266456_AT	AT2G22770	basic helix-loop-helix (bHLH) family protein
266419_AT	AT2G38760	annexin 3 (ANN3)
266418_AT	AT2G38750	annexin 4 (ANN4)
266368_AT	AT2G41380	embryo-abundant protein-related
266364_AT	AT2G41230	expressed protein
266346_AT	AT2G01430	homeobox-leucine zipper protein 17 (HB-17) / HD-ZIP transcription factor 17
266270_AT	AT2G29470	glutathione S-transferase, putative
266267_AT	AT2G29460	glutathione S-transferase, putative
266222_AT	AT2G28780	expressed protein
266214_AT	AT2G06890	gypsy-like retrotransposon family
266151_X_AT	AT2G12300	CACTA-like transposase family (Ptta/En/Spm)
266148_X_AT	AT2G12240	CACTA-like transposase family (Ptta/En/Spm)
266142_AT	AT2G39030	GCN5-related N-acetyltransferase (GNAT) family protein
266066_AT	AT2G18800	xyloglucan
266011_AT	AT2G37440	endonuclease/exonuclease/phosphatase family protein
266010_AT	AT2G37430	zinc finger (C2H2 type) family protein (ZAT11)
265993_AT	AT2G24160	pseudogene, leucine rich repeat protein family
265894_AT	AT2G15050	lipid transfer protein, putative
265877_AT	AT2G42380	bZIP transcription factor family protein
265856_AT	AT2G42430	LOB domain protein 16 / lateral organ boundaries domain protein 16 (LBD16)
265841_AT	AT2G35710	glycogenin glucosyltransferase (glycogenin)-related
265806_AT	AT2G18010	auxin-responsive family protein
265792_AT	AT2G01380	predicted by genscan and genefinder
265757_X_AT	AT2G13160	CACTA-like transposase family (Ptta/En/Spm)
265754_X_AT	AT2G10640	CACTA-like transposase family (Ptta/En/Spm)
265748_AT	AT2G10620	gypsy-like retrotransposon family (Athila)
265725_AT	AT2G32030	GCN5-related N-acetyltransferase (GNAT) family protein
265723_AT	AT2G32140	disease resistance protein (TIR class), putative
265674_AT	AT2G32190	expressed protein
265670_S_AT	AT2G32210	expressed protein
265668_AT	AT2G32020	GCN5-related N-acetyltransferase (GNAT) family protein
265654_S_AT	AT2G13870	CACTA-like transposase family (Ptta/En/Spm)
265603_AT	AT2G14360	hypothetical protein predicted by genscan and genefinder
265586_AT	AT2G19990	pathogenesis-related protein 1 (PR-1)
265558_AT	AT2G05550	non-LTR retrotransposon family (LINE)
265501_AT	AT2G15490	UDP-glucoronosyl/UDP-glucosyl transferase family protein
265490_S_AT	AT2G15470	glycoside hydrolase family 28 protein / polygalacturonase (pectinase) family protein
265443_AT	AT2G20750	beta-expansin, putative (EXPB1)
265420_S_AT	AT2G21030	expressed protein
265327_AT	AT2G18210	expressed protein
265305_AT	AT2G20340	tyrosine decarboxylase, putative
265279_AT	AT2G28460	DC1 domain-containing protein
265276_AT	AT2G28400	expressed protein
265170_AT	AT1G23730	carbonic anhydrase, putative / carbonate dehydratase, putative
265160_AT	AT1G31050	expressed protein
265159_AT	AT1G31060	expressed protein
265114_AT	AT1G62440	leucine-rich repeat family protein / extensin family protein
264902_AT	AT1G23060	expressed protein
264898_AT	AT1G23205	invertase/pectin methylesterase inhibitor family protein
264866_AT	AT1G24140	matrixin family protein
264788_AT	AT2G17880	DNAJ heat shock protein, putative
264775_AT	AT1G22880	glycosyl hydrolase family 9 protein
264643_AT	AT1G08990	glycogenin glucosyltransferase (glycogenin)-related
264580_AT	AT1G05340	expressed protein
264537_AT	AT1G55610	protein kinase family protein
264527_AT	AT1G30760	FAD-binding domain-containing protein
264511_AT	AT1G09350	galactinol synthase, putative
264497_AT	AT1G30840	purine permease-related
264479_AT	AT1G77280	protein kinase family protein
264470_AT	AT1G67110	cytochrome P450, putative
264404_AT	AT2G25160	cytochrome P450, putative
264403_AT	AT2G25150	transferase family protein
264354_S_AT	AT1G03240	hypothetical protein
264328_AT	AT1G04100	auxin-responsive protein / indoleacetic acid-induced protein 10 (IAA10)
264151_AT	AT1G02070	expressed protein
264100_AT	AT1G78970	lupeol synthase (LUP1) / 2,3-oxidosqualene-triterpenoid cyclase
264073_AT	AT2G10840	pseudogene, hypothetical protein
264052_AT	AT2G22330	cytochrome P450, putative
263970_AT	AT2G42850	cytochrome P450 family protein
263968_S_AT	AT2G12980	CACTA-like transposase family (Ptta/En/Spm)
263965_AT	AT2G12870	gypsy-like retrotransposon family
263935_AT	AT2G35930	U-box domain-containing protein
263931_AT	AT2G36220	expressed protein
263890_AT	AT2G37030	auxin-responsive family protein
263812_AT	AT2G09960	expressed protein
263781_AT	AT2G46360	expressed protein
263675_X_AT	AT2G04770	CACTA-like transposase family (Ptta/En/Spm)
263656_AT	AT1G04240	auxin-responsive protein / indoleacetic acid-induced protein 3 (IAA3)
263653_AT	AT1G04310	ethylene receptor-related
263596_AT	AT2G01900	endonuclease/exonuclease/phosphatase family protein
263509_S_AT	AT2G07687	cytochrome c oxidase subunit 3
263479_X_AT	AT2G04000	expressed protein
263436_AT	AT2G28690	expressed protein
263360_AT	AT2G03830	expressed protein
263312_AT	AT2G10460	hypothetical protein
263231_AT	AT1G05680	UDP-glucoronosyl/UDP-glucosyl transferase family protein
263229_S_AT	AT1G05650	polygalacturonase, putative / pectinase, putative
263182_AT	AT1G05575	expressed protein
263088_AT	AT2G16160	hypothetical protein
263075_AT	AT2G17570	undecaprenyl pyrophosphate synthetase family protein / UPP synthetase family protein
263061_AT	AT2G18190	AAA-type ATPase family protein
262971_AT	AT1G75640	leucine-rich repeat family protein / protein kinase family protein
262915_AT	AT1G59940	two-component responsive regulator / response regulator 3 (ARR3)
262912_AT	AT1G59740	proton-dependent oligopeptide transport (POT) family protein
262873_AT	AT1G64700	expressed protein
262838_AT	AT1G14960	major latex protein-related / MLP-related
262704_AT	AT1G16530	LOB domain protein 3 / lateral organ boundaries domain protein 3 (LBD3)
262643_AT	AT1G62770	invertase/pectin methylesterase inhibitor family protein
262608_AT	AT1G14120	2-oxoglutarate-dependent dioxygenase, putative
262603_AT	AT1G15380	lactoylglutathione lyase family protein / glyoxalase I family protein
262575_AT	AT1G15210	ABC transporter family protein
262525_AT	AT1G17060	cytochrome P450, putative
262516_AT	AT1G17190	glutathione S-transferase, putative
262448_AT	AT1G49450	transducin family protein / WD-40 repeat family protein
262421_AT	AT1G50290	expressed protein
262406_AT	AT1G34670	myb family transcription factor
262381_AT	AT1G72900	disease resistance protein (TIR-NBS class), putative
262259_S_AT	AT1G53870	expressed protein
262170_AT	AT1G74940	senescence-associated protein-related
262162_AT	AT1G78020	senescence-associated protein-related
262118_AT	AT1G02850	glycosyl hydrolase family 1 protein
262099_S_AT	AT1G59500	auxin-responsive GH3 family protein
262090_AT	AT1G55970	histone acetyltransferase 4 (HAC4)
262045_AT	AT1G80240	expressed protein
262039_AT	AT1G80050	adenine phosphoribosyltransferase 2 (APT2)
262008_S_AT	AT1G35590	CACTA-like transposase family (Tnp2/En/Spm)
262006_AT	AT1G64570	expressed protein
262001_AT	AT1G33790	jacalin lectin family protein
261978_AT	AT1G37060	gypsy-like retrotransposon family (Athila)
261957_AT	AT1G64660	Cys/Met metabolism pyridoxal-phosphate-dependent enzyme family protein
261917_AT	AT1G65920	regulator of chromosome condensation (RCC1) family protein / zinc finger protein-related
261910_AT	AT1G80730	zinc finger (C2H2 type) family protein (ZFP1)
261892_AT	AT1G80840	WRKY family transcription factor
261881_AT	AT1G80760	major intrinsic family protein / MIP family protein
261766_AT	AT1G15580	auxin-responsive protein / indoleacetic acid-induced protein 5 (IAA5) / auxin-induced protein (AUX2-27)
261648_AT	AT1G27730	zinc finger (C2H2 type) family protein (ZAT10) / salt-tolerance zinc finger protein (STZ)
261619_X_AT	AT1G33130	CACTA-like transposase family (Ptta/En/Spm)
261571_AT	AT1G01150	expressed protein
261476_AT	AT1G14480	ankyrin repeat family protein
261470_AT	AT1G28370	ERF domain protein 11 (ERF11)
261459_AT	AT1G21100	O-methyltransferase, putative
261407_AT	AT1G18810	phytochrome kinase substrate-related
261395_AT	AT1G79700	ovule development protein, putative
261367_AT	AT1G53080	legume lectin family protein
261327_AT	AT1G44830	AP2 domain-containing transcription factor TINY, putative
261114_AT	AT1G75390	bZIP transcription factor family protein
261100_AT	AT1G63020	DNA-directed RNA polymerase alpha subunit family protein
260957_AT	AT1G06080	delta 9 desaturase (ADS1)
260933_AT	AT1G02470	expressed protein
260915_AT	AT1G02660	lipase class 3 family protein
260840_AT	AT1G29050	expressed protein
260744_AT	AT1G15010	expressed protein
260742_AT	AT1G15050	auxin-responsive AUX/IAA family protein
260741_AT	AT1G15045	hypothetical protein contains Pfam profile: PF00117 Glutamine amidotransferase class-I
260693_AT	AT1G32450	proton-dependent oligopeptide transport (POT) family protein
260668_AT	AT1G19530	expressed protein
260608_AT	AT2G43870	polygalacturonase, putative / pectinase, putative
260600_AT	AT1G55950	hypothetical protein
260528_AT	AT2G47260	WRKY family transcription factor
260522_X_AT	AT2G41730	expressed protein
260494_AT	AT2G41820	leucine-rich repeat transmembrane protein kinase, putative
260453_S_AT	AT1G72510	expressed protein
260406_AT	AT1G69920	glutathione S-transferase, putative
260399_AT	AT1G72520	lipoxygenase, putative
260376_AT	AT1G74110	cytochrome P450 family protein
260220_AT	AT1G74650	myb family transcription factor (cY13)
260198_AT	AT1G67635	hypothetical protein
260179_AT	AT1G70690	kinase-related
260152_AT	AT1G52830	auxin-responsive protein / indoleacetic acid-induced protein 6 (IAA6)
260058_AT	AT1G78100	F-box family protein
259878_AT	AT1G76790	O-methyltransferase family 2 protein
259854_AT	AT1G72200	zinc finger (C3HC4-type RING finger) family protein
259845_AT	AT1G73590	auxin efflux carrier protein, putative (PIN1)
259843_AT	AT1G73570	suppressor of lin-12-like protein-related / sel-1 protein-related
259790_S_AT	AT1G29430	auxin-responsive family protein
259787_AT	AT1G29460	auxin-responsive protein, putative
259785_AT	AT1G29490	auxin-responsive family protein
259784_AT	AT1G29450	auxin-responsive protein, putative
259783_AT	AT1G29510	auxin-responsive protein, putative
259773_AT	AT1G29500	auxin-responsive protein, putative
259758_S_AT	AT1G77530	O-methyltransferase family 2 protein
259751_AT	AT1G71030	myb family transcription factor
259735_AT	AT1G64405	expressed protein
259649_AT	AT1G55300	TATA-binding protein-associated factor TAFII55 family protein
259445_AT	AT1G02400	gibberellin 2-oxidase, putative / GA2-oxidase, putative
259388_AT	AT1G13420	sulfotransferase family protein
259332_AT	AT3G03830	auxin-responsive protein, putative
259331_AT	AT3G03840	auxin-responsive protein, putative
259297_AT	AT3G05360	disease resistance family protein / LRR family protein
259276_AT	AT3G01190	peroxidase 27 (PER27) (P27) (PRXR7)
259264_AT	AT3G01260	aldose 1-epimerase family protein
259116_AT	AT3G01350	proton-dependent oligopeptide transport (POT) family protein
259042_AT	AT3G03450	gibberellin response modulator, putative / gibberellin-responsive modulator, putative
259018_AT	AT3G07390	auxin-responsive protein / auxin-induced protein (AIR12)
258984_AT	AT3G08970	DNAJ heat shock N-terminal domain-containing protein
258975_AT	AT3G01970	WRKY family transcription factor
258907_AT	AT3G06370	sodium proton exchanger, putative (NHX3)
258878_AT	AT3G03170	expressed protein
258851_AT	AT3G03190	glutathione S-transferase, putative
258787_AT	AT3G11840	U-box domain-containing protein
258769_AT	AT3G10870	hydrolase, alpha/beta fold family protein
258764_AT	AT3G10720	pectinesterase, putative
258629_AT	AT3G02850	stelar K+ outward rectifier (SKOR) / potassium channel protein
258618_AT	AT3G02885	gibberellin-regulated protein 5 (GASA5) / gibberellin-responsive protein 5
258586_S_AT	AT3G04320	trypsin and protease inhibitor family protein / Kunitz family protein
258541_AT	AT3G07000	DC1 domain-containing protein
258516_AT	AT3G06490	myb family transcription factor (MYB108)
258414_AT	AT3G17380	meprin and TRAF homology domain-containing protein / MATH domain-containing protein
258402_AT	AT3G15450	expressed protein
258399_AT	AT3G15540	auxin-responsive protein / indoleacetic acid-induced protein 19 (IAA19)
258377_AT	AT3G17690	cyclic nucleotide-binding transporter 2 / CNBT2 (CNGC19)
258299_AT	AT3G23410	alcohol oxidase-related
258293_AT	AT3G23430	phosphate transporter, putative (PHO1)
258290_AT	AT3G23460	cyclopropane fatty acid synthase-related
258253_AT	AT3G26760	short-chain dehydrogenase/reductase (SDR) family protein
258252_AT	AT3G15720	glycoside hydrolase family 28 protein / polygalacturonase (pectinase) family protein
258181_AT	AT3G21670	nitrate transporter (NTP3)
257951_AT	AT3G21700	expressed protein
257927_AT	AT3G23240	ethylene-responsive factor 1 / ethylene response factor 1 (ERF1)
257919_AT	AT3G23250	myb family transcription factor (MYB15)
257900_AT	AT3G28420	expressed protein
257766_AT	AT3G23030	auxin-responsive protein / indoleacetic acid-induced protein 2 (IAA2)
257642_AT	AT3G25710	basic helix-loop-helix (bHLH) family protein
257638_AT	AT3G25820	myrcene/ocimene synthase, putative
257619_AT	AT3G24810	kip-related protein 5 (KRP5) / cyclin-dependent kinase inhibitor 5 (ICK5)
257506_AT	AT1G29440	auxin-responsive family protein
257504_AT	AT1G52250	dynein light chain type 1 family protein
257500_S_AT	AT1G73300	serine carboxypeptidase S10 family protein
257481_AT	AT1G08430	expressed protein
257386_AT	AT2G42440	LOB domain protein 17 / lateral organ boundaries domain protein 17 (LBD17)
257272_AT	AT3G28130	nodulin MtN21 family protein
257242_AT	AT3G24220	9-cis-epoxycarotenoid dioxygenase, putative / neoxanthin cleavage enzyme, putative / carotenoid cleavage dioxygenase, putative
257229_AT	AT3G16490	calmodulin-binding family protein
257068_AT	AT3G28160	copia-like retrotransposon family
257049_AT	AT3G15250	expressed protein
257026_AT	AT3G19200	hypothetical protein
256981_AT	AT3G13380	leucine-rich repeat family protein / protein kinase family protein
256875_AT	AT3G26330	cytochrome P450 family protein
256833_AT	AT3G22910	calcium-transporting ATPase, plasma membrane-type, putative / Ca(2+)-ATPase, putative (ACA13)
256799_AT	AT3G18560	expressed protein
256751_AT	AT3G27170	chloride channel protein (CLC-b)
256748_X_AT	AT3G30396	CACTA-like transposase family (Ptta/En/Spm)
256743_AT	AT3G29370	expressed protein
256673_AT	AT3G52370	beta-Ig-H3 domain-containing protein / fasciclin domain-containing protein
256626_AT	AT3G20015	aspartyl protease family protein
256621_AT	AT3G24450	copper-binding family protein
256576_AT	AT3G28210	zinc finger (AN1-like) family protein
256563_AT	AT3G29780	expressed protein
256560_S_AT	AT3G31415	terpene synthase/cyclase family protein
256517_AT	AT1G66170	PHD finger family protein (MMD1)
256506_AT	AT1G75160	expressed protein
256499_AT	AT1G36640	expressed protein
256356_S_AT	AT1G66500	zinc finger (C2H2-type) family protein
256340_AT	AT1G72070	DNAJ heat shock N-terminal domain-containing protein
256334_AT	AT1G72120	proton-dependent oligopeptide transport (POT) family protein
256306_AT	AT1G30370	lipase class 3 family protein
256300_AT	AT1G69490	no apical meristem (NAM) family protein
256190_AT	AT1G30100	9-cis-epoxycarotenoid dioxygenase, putative / neoxanthin cleavage enzyme, putative / carotenoid cleavage dioxygenase, putative
256128_AT	AT1G18140	laccase family protein / diphenol oxidase family protein
256073_AT	AT1G18100	mother of FT and TF1 protein (MFT)
256030_AT	AT1G34110	leucine-rich repeat transmembrane protein kinase, putative
256024_AT	AT1G58340	MATE efflux protein-related
256010_AT	AT1G19220	transcriptional factor B3 family protein / auxin-responsive factor AUX/IAA-related
256008_S_AT	AT1G34040	alliinase family protein
255899_AT	AT1G17970	zinc finger (C3HC4-type RING finger) family protein
255824_AT	AT2G40530	expressed protein
255788_AT	AT2G33310	auxin-responsive protein / indoleacetic acid-induced protein 13 (IAA13)
255695_AT	AT4G00080	invertase/pectin methylesterase inhibitor family protein
255549_AT	AT4G01950	phospholipid/glycerol acyltransferase family protein
255543_AT	AT4G01870	tolB protein-related
255538_AT	AT4G01680	myb family transcription factor (MYB55)
255450_AT	AT4G02850	phenazine biosynthesis PhzC/PhzF family protein
255413_AT	AT4G03140	short-chain dehydrogenase/reductase (SDR) family protein
255201_AT	AT4G07490	transposon protein -related
255177_AT	AT4G08040	1-aminocyclopropane-1-carboxylate synthase, putative / ACC synthase, putative
255156_AT	AT4G07780	gypsy-like retrotransposon family (Athila)
255127_AT	AT4G08300	nodulin MtN21 family protein
255074_AT	AT4G09100	zinc finger (C3HC4-type RING finger) family protein
255028_AT	AT4G09890	expressed protein
254931_AT	AT4G11460	protein kinase family protein
254926_AT	AT4G11280	1-aminocyclopropane-1-carboxylate synthase 6 / ACC synthase 6 (ACS6)
254909_AT	AT4G11210	disease resistance-responsive family protein / dirigent family protein
254907_AT	AT4G11190	disease resistance-responsive family protein / dirigent family protein
254833_S_AT	AT4G12280	copper amine oxidase family protein
254820_S_AT	AT4G12510	protease inhibitor/seed storage/lipid transfer protein (LTP) family protein
254809_AT	AT4G12410	auxin-responsive family protein
254761_AT	AT4G13195	expressed protein
254759_AT	AT4G13180	short-chain dehydrogenase/reductase (SDR) family protein
254685_AT	AT4G13790	auxin-responsive protein, putative
254644_AT	AT4G18510	Clavata3 / ESR-Related-2 (CLE2)
254631_AT	AT4G18610	expressed protein
254606_AT	AT4G19030	major intrinsic family protein / MIP family protein
254575_AT	AT4G19460	glycosyl transferase family 1 protein
254564_AT	AT4G19170	9-cis-epoxycarotenoid dioxygenase, putative / neoxanthin cleavage enzyme, putative / carotenoid cleavage dioxygenase, putative
254550_AT	AT4G19690	iron-responsive transporter (IRT1)
254468_AT	AT4G20460	NAD-dependent epimerase/dehydratase family protein
254459_AT	AT4G21200	oxidoreductase, 2OG-Fe(II) oxygenase family protein
254432_AT	AT4G20830	FAD-binding domain-containing protein
254430_AT	AT4G20820	FAD-binding domain-containing protein
254323_AT	AT4G22620	auxin-responsive family protein
254318_AT	AT4G22530	embryo-abundant protein-related
254300_AT	AT4G22780	ACT domain-containing protein (ACR7)
254175_AT	AT4G24050	short-chain dehydrogenase/reductase (SDR) family protein
254120_AT	AT4G24570	mitochondrial substrate carrier family protein
254065_AT	AT4G25420	gibberellin 20-oxidase
254064_AT	AT4G25410	basix helix-loop-helix (bHLH) family protein
254056_AT	AT4G25250	invertase/pectin methylesterase inhibitor family protein
254022_AT	AT4G25750	ABC transporter family protein
253971_AT	AT4G26530	fructose-bisphosphate aldolase, putative
253957_AT	AT4G26320	arabinogalactan-protein (AGP13)
253915_AT	AT4G27280	calcium-binding EF hand family protein
253908_AT	AT4G27260	auxin-responsive GH3 family protein
253866_AT	AT4G27480	glycosyltransferase family 14 protein / core-2/I-branching enzyme family protein
253802_AT	AT4G28180	expressed protein
253791_AT	AT4G28640	auxin-responsive protein / indoleacetic acid-induced protein 11 (IAA11)
253779_AT	AT4G28490	leucine-rich repeat transmembrane protein kinase, putative
253744_S_AT	AT4G28960	hypothetical protein
253736_AT	AT4G28780	GDSL-motif lipase/hydrolase family protein
253667_AT	AT4G30170	peroxidase, putative
253660_AT	AT4G30140	GDSL-motif lipase/hydrolase family protein
253657_AT	AT4G30110	ATPase E1-E2 type family protein / haloacid dehalogenase-like hydrolase family protein / heavy-metal-associated domain-containing protein
253643_AT	AT4G29780	expressed protein
253629_AT	AT4G30450	glycine-rich protein
253618_AT	AT4G30420	nodulin MtN21 family protein
253617_AT	AT4G30410	expressed protein
253608_AT	AT4G30290	xyloglucan
253573_AT	AT4G31020	expressed protein
253525_AT	AT4G31330	expressed protein
253423_AT	AT4G32280	auxin-responsive AUX/IAA family protein
253398_AT	AT4G32810	dioxygenase-related
253345_AT	AT4G33570	putative protein
253255_AT	AT4G34760	auxin-responsive family protein
253227_AT	AT4G35030	protein kinase family protein
253207_AT	AT4G34770	auxin-responsive family protein
253179_AT	AT4G35200	hypothetical protein
253155_AT	AT4G35720	expressed protein
253103_AT	AT4G36110	auxin-responsive protein, putative
253100_AT	AT4G37400	cytochrome P450 family protein
253066_AT	AT4G37770	1-aminocyclopropane-1-carboxylate synthase, putative / ACC synthase, putative
253047_AT	AT4G37295	expressed protein
253046_AT	AT4G37370	cytochrome P450, putative
253044_AT	AT4G37290	expressed protein
253011_AT	AT4G37890	zinc finger (C3HC4-type RING finger) family protein
252988_AT	AT4G38410	dehydrin, putative
252970_AT	AT4G38850	auxin-responsive protein / small auxin up RNA (SAUR-AC1)
252921_AT	AT4G39030	enhanced disease susceptibility 5 (EDS5) / salicylic acid induction deficient 1 (SID1)
252882_AT	AT4G39675	expressed protein
252827_AT	AT4G39950	cytochrome P450 79B2, putative (CYP79B2)
252784_AT	AT3G43040	pseudogene, hypothetical protein
252775_S_AT	AT3G42930	CACTA-like transposase family (Ptta/En/Spm)
252765_AT	AT3G42800	expressed protein
252740_AT	AT3G43270	pectinesterase family protein
252681_AT	AT3G44350	no apical meristem (NAM) family protein
252629_AT	AT3G44970	cytochrome P450 family protein
252605_S_AT	AT3G45070	sulfotransferase family protein
252594_AT	AT3G45680	proton-dependent oligopeptide transport (POT) family protein
252579_AT	AT3G45510	zinc finger (C3HC4-type RING finger) family protein
252536_AT	AT3G45700	proton-dependent oligopeptide transport (POT) family protein
252534_AT	AT3G46130	myb family transcription factor (MYB48)
252529_AT	AT3G46490	oxidoreductase, 2OG-Fe(II) oxygenase family protein
252510_AT	AT3G46270	receptor protein kinase-related
252435_AT	AT3G47320	hypothetical protein
252365_AT	AT3G48350	cysteine proteinase, putative
252340_AT	AT3G48920	myb family transcription factor (MYB45)
252300_AT	AT3G49160	pyruvate kinase family protein
252233_AT	AT3G49690	myb family transcription factor
252204_AT	AT3G50340	expressed protein
252202_AT	AT3G50300	transferase family protein
252131_AT	AT3G50930	AAA-type ATPase family protein
252103_AT	AT3G51410	expressed protein
252057_AT	AT3G52480	expressed protein
251928_AT	AT3G53980	protease inhibitor/seed storage/lipid transfer protein (LTP) family protein
251925_AT	AT3G54000	expressed protein
251916_AT	AT3G53960	proton-dependent oligopeptide transport (POT) family protein
251884_AT	AT3G54150	embryo-abundant protein-related
251824_AT	AT3G55090	ABC transporter family protein
251771_AT	AT3G56000	glycosyl transferase family 2 protein
251751_AT	AT3G55720	expressed protein
251713_AT	AT3G56080	dehydration-responsive protein-related
251698_AT	AT3G56610	expressed protein
251586_AT	AT3G58070	zinc finger (C2H2 type) family protein
251565_AT	AT3G58190	LOB domain protein 29 / lateral organ boundaries domain protein 29 (LBD29)
251524_AT	AT3G58990	aconitase C-terminal domain-containing protein
251517_AT	AT3G59370	expressed protein
251436_AT	AT3G59900	expressed protein
251423_AT	AT3G60550	cyclin family protein
251377_AT	AT3G60650	expressed protein
251372_AT	AT3G60520	expressed protein
251358_AT	AT3G61160	shaggy-related protein kinase beta / ASK-beta (ASK2)
251336_AT	AT3G61190	BON1-associated protein 1 (BAP1)
251335_AT	AT3G61400	2-oxoglutarate-dependent dioxygenase, putative
251298_AT	AT3G62040	haloacid dehalogenase-like hydrolase family protein
251246_AT	AT3G62100	auxin-responsive protein, putative
251178_AT	AT3G63440	FAD-binding domain-containing protein / cytokinin oxidase family protein
251169_AT	AT3G63210	expressed protein
251160_AT	AT3G63240	endonuclease/exonuclease/phosphatase family protein
251154_AT	AT3G63110	adenylate isopentenyltransferase 3 / cytokinin synthase (IPT3)
251144_AT	AT5G01210	transferase family protein
251072_AT	AT5G01740	expressed protein
251028_AT	AT5G02230	haloacid dehalogenase-like hydrolase family protein
251017_AT	AT5G02760	protein phosphatase 2C family protein / PP2C family protein
251013_AT	AT5G02540	short-chain dehydrogenase/reductase (SDR) family protein
250709_AT	AT5G06080	LOB domain protein 33 / lateral organ boundaries domain protein 33 (LBD33)
250701_AT	AT5G06840	bZIP transcription factor-like protein
250680_AT	AT5G06570	expressed protein
250670_AT	AT5G06860	polygalacturonase inhibiting protein 1 (PGIP1)
250662_AT	AT5G07010	sulfotransferase family protein
250598_AT	AT5G07690	myb family transcription factor (MYB29)
250558_AT	AT5G07990	flavonoid 3'-monooxygenase / flavonoid 3'-hydroxylase (F3'H) / cytochrome P450 75B1 (CYP75B1) / transparent testa 7 protein (TT7)
250509_AT	AT5G09970	cytochrome P450 family protein
250487_AT	AT5G09690	magnesium transporter CorA-like family protein (MRS2-7)
250443_AT	AT5G10520	protein kinase family protein
250438_AT	AT5G10580	expressed protein
250327_AT	AT5G12050	expressed protein
250287_AT	AT5G13330	AP2 domain-containing transcription factor family protein
250286_AT	AT5G13320	auxin-responsive GH3 family protein
250277_AT	AT5G12940	leucine-rich repeat family protein
250200_AT	AT5G14130	peroxidase, putative
250173_AT	AT5G14340	myb family transcription factor (MYB40)
250142_AT	AT5G14650	polygalacturonase, putative / pectinase, putative
250091_AT	AT5G17340	expressed protein
250012_X_AT	AT5G18060	auxin-responsive protein, putative
249992_AT	AT5G18560	AP2 domain-containing transcription factor, putative
249983_AT	AT5G18470	curculin-like (mannose-binding) lectin family protein
249971_AT	AT5G19110	extracellular dermal glycoprotein-related / EDGP-related
249939_AT	AT5G22430	expressed protein
249932_AT	AT5G22390	expressed protein
249848_AT	AT5G23220	isochorismatase hydrolase family protein
249768_AT	AT5G24100	leucine-rich repeat transmembrane protein kinase, putative
249686_AT	AT5G36140	cytochrome P450-related
249683_X_AT	AT5G36090	hypothetical protein
249626_AT	AT5G37540	aspartyl protease family protein
249532_AT	AT5G38780	S-adenosyl-L-methionine
249459_AT	AT5G39580	peroxidase, putative
249417_AT	AT5G39670	calcium-binding EF hand family protein
249383_AT	AT5G39860	bHLH protein
249364_AT	AT5G40590	DC1 domain-containing protein
249306_AT	AT5G41400	zinc finger (C3HC4-type RING finger) family protein
249205_AT	AT5G42600	pentacyclic triterpene synthase, putative
249203_AT	AT5G42590	cytochrome P450 71A16, putative (CYP71A16)
249197_AT	AT5G42380	calmodulin-related protein, putative
249125_AT	AT5G43450	2-oxoglutarate-dependent dioxygenase, putative
249087_AT	AT5G44210	ERF domain protein 9 (ERF9)
249080_AT	AT5G43990	SET domain-containing protein
249065_AT	AT5G44260	zinc finger (CCCH-type) family protein
248978_AT	AT5G45070	disease resistance protein (TIR class), putative
248961_AT	AT5G45650	subtilase family protein
248876_AT	AT5G46120	hypothetical protein
248844_S_AT	AT5G46900	protease inhibitor/seed storage/lipid transfer protein (LTP) family protein
248801_AT	AT5G47370	homeobox-leucine zipper protein 2 (HAT2) / HD-ZIP protein 2
248790_AT	AT5G47450	major intrinsic family protein / MIP family protein
248772_AT	AT5G47800	phototropic-responsive NPH3 family protein
248759_AT	AT5G47610	zinc finger (C3HC4-type RING finger) family protein
248727_AT	AT5G47990	cytochrome P450 family protein
248725_AT	AT5G47980	transferase family protein
248717_AT	AT5G48175	expressed protein
248622_AT	AT5G49360	glycosyl hydrolase family 3 protein
248617_AT	AT5G49590	hypothetical protein
248548_AT	AT5G50300	xanthine/uracil/vitamin C permease family protein
248539_AT	AT5G50130	short-chain dehydrogenase/reductase (SDR) family protein
248509_AT	AT5G50335	expressed protein
248448_AT	AT5G51190	AP2 domain-containing transcription factor, putative
248423_AT	AT5G51670	expressed protein
248372_AT	AT5G51850	expressed protein
248371_AT	AT5G51810	gibberellin 20-oxidase, putative
248322_AT	AT5G52760	heavy-metal-associated domain-containing protein
248316_AT	AT5G52670	heavy-metal-associated domain-containing protein
248282_AT	AT5G52900	expressed protein
248278_AT	AT5G52890	AT hook motif-containing protein
248253_AT	AT5G53290	AP2 domain-containing transcription factor, putative
248208_AT	AT5G53980	homeobox-leucine zipper family protein
248205_AT	AT5G54300	expressed protein
248164_AT	AT5G54490	calcium-binding EF-hand protein, putative
248163_AT	AT5G54510	auxin-responsive GH3 protein, putative (DFL-1)
248118_AT	AT5G55050	GDSL-motif lipase/hydrolase family protein
247991_AT	AT5G56320	expansin, putative (EXP14)
247965_AT	AT5G56540	arabinogalactan-protein (AGP14)
247925_AT	AT5G57560	xyloglucan
247903_AT	AT5G57340	expressed protein
247869_AT	AT5G57520	zinc finger (C2H2 type) family protein (ZFP2)
247802_AT	AT5G58580	zinc finger (C3HC4-type RING finger) family protein
247655_AT	AT5G59820	zinc finger (C2H2 type) family protein (ZAT12)
247600_AT	AT5G60890	receptor-like protein kinase (ATR1) (MYB34)
247586_AT	AT5G60660	major intrinsic family protein / MIP family protein
247582_AT	AT5G60760	2-phosphoglycerate kinase-related
247554_AT	AT5G61010	exocyst subunit EXO70 family protein
247549_AT	AT5G61420	myb family transcription factor (MYB28)
247478_AT	AT5G62360	invertase/pectin methylesterase inhibitor family protein
247474_AT	AT5G62280	expressed protein
247352_AT	AT5G63650	serine/threonine protein kinase, putative
247282_AT	AT5G64240	latex-abundant family protein (AMC3) / caspase family protein
247255_AT	AT5G64780	expressed protein
247252_AT	AT5G64770	expressed protein
247215_AT	AT5G64905	expressed protein
247205_AT	AT5G64890	expressed protein
247179_AT	AT5G65320	basic helix-loop-helix (bHLH) family protein
247177_AT	AT5G65300	expressed protein
247162_AT	AT5G65730	xyloglucan
247159_AT	AT5G65800	1-aminocyclopropane-1-carboxylate synthase, putative / ACC synthase, putative
247071_AT	AT5G66640	LIM domain-containing protein-related
247070_AT	AT5G66815	expressed protein
247030_AT	AT5G67210	expressed protein
247023_AT	AT5G67060	basic helix-loop-helix (bHLH) family protein
246992_AT	AT5G67430	GCN5-related N-acetyltransferase (GNAT) family protein
246933_AT	AT5G25160	zinc finger (C2H2 type) family protein (ZFP3)
246900_AT	AT5G25620	flavin-containing monooxygenase, putative / FMO, putative
246798_AT	AT5G26930	zinc finger (GATA type) family protein
246666_AT	AT5G34830	expressed protein
246580_AT	AT1G31770	ABC transporter family protein
246401_AT	AT1G57560	myb family transcription factor (MYB50)
246142_AT	AT5G19970	expressed protein
246000_AT	AT5G20820	auxin-responsive protein-related
245965_AT	AT5G19730	pectinesterase family protein
245947_AT	AT5G19530	spermine/spermidine synthase family protein
245757_AT	AT1G35140	phosphate-responsive protein, putative
245753_AT	AT1G35143	hypothetical protein
245696_AT	AT5G04190	phytochrome kinase substrate-related
245689_AT	AT5G04120	phosphoglycerate/bisphosphoglycerate mutase family protein
245658_AT	AT1G28270	rapid alkalinization factor (RALF) family protein
245593_AT	AT4G14550	auxin-responsive AUX/IAA family protein
245546_AT	AT4G15290	cellulose synthase family protein
245501_AT	AT4G15620	integral membrane family protein
245416_AT	AT4G17350	expressed protein
245397_AT	AT4G14560	auxin-responsive protein / indoleacetic acid-induced protein 1 (IAA1)
245362_AT	AT4G17460	homeobox-leucine zipper protein 1 (HAT1) / HD-ZIP protein 1
245336_AT	AT4G16515	expressed protein
245304_AT	AT4G15630	integral membrane family protein
245276_AT	AT4G16780	homeobox-leucine zipper protein 4 (HAT4) / HD-ZIP protein 4
245262_AT	AT4G16563	aspartyl protease family protein
245250_AT	AT4G17490	ethylene-responsive element-binding protein, putative
245209_AT	AT5G12340	expressed protein
245196_AT	AT1G67750	pectate lyase family protein
245158_AT	AT2G33130	rapid alkalinization factor (RALF) family protein
245140_AT	AT2G45420	LOB domain protein 18 / lateral organ boundaries domain protein 18 (LBD18)
245119_AT	AT2G41640	expressed protein
245108_AT	AT2G41510	FAD-binding domain-containing protein / cytokinin oxidase family protein
245079_AT	AT2G23330	copia-like retrotransposon family
245076_AT	AT2G23170	auxin-responsive GH3 family protein
245075_AT	AT2G23180	cytochrome P450, putative
245041_AT	AT2G26530	expressed protein
245038_AT	AT2G26560	patatin, putative
245005_AT	RPS14	ribosomal protein S14
244943_AT	NAD9	NADH dehydrogenase subunit 9
244911_AT	ORF170	hypothetical protein

## Sheet: GA responses
regulated all GA
Affy ID	AGI	Description
267614_AT	AT2G26710	cytochrome P450, putative
267389_AT	AT2G44460	glycosyl hydrolase family 1 protein
267207_AT	AT2G30840	2-oxoglutarate-dependent dioxygenase, putative
267075_AT	AT2G41070	basic leucine zipper transcription factor (BZIP12)
267011_AT	AT2G39230	pentatricopeptide (PPR) repeat-containing protein
266962_AT	AT2G39440	expressed protein
266912_AT	AT2G45900	expressed protein
266778_AT	AT2G29090	cytochrome P450 family protein
266730_AT	AT2G03110	KH domain-containing protein
266465_AT	AT2G47750	auxin-responsive GH3 family protein
266250_AT	AT2G27870	hypothetical protein
266151_X_AT	AT2G12300	CACTA-like transposase family (Ptta/En/Spm)
266148_X_AT	AT2G12240	CACTA-like transposase family (Ptta/En/Spm)
266142_AT	AT2G39030	GCN5-related N-acetyltransferase (GNAT) family protein
266014_S_AT	AT2G07722	hypothetical protein
266011_AT	AT2G37440	endonuclease/exonuclease/phosphatase family protein
265993_AT	AT2G24160	pseudogene, leucine rich repeat protein family
265757_X_AT	AT2G13160	CACTA-like transposase family (Ptta/En/Spm)
265754_X_AT	AT2G10640	CACTA-like transposase family (Ptta/En/Spm)
265654_S_AT	AT2G13870	CACTA-like transposase family (Ptta/En/Spm)
265490_S_AT	AT2G15470	glycoside hydrolase family 28 protein / polygalacturonase (pectinase) family protein
265276_AT	AT2G28400	expressed protein
265091_S_AT	AT1G03495	pseudogene, transferase family
265053_AT	AT1G52000	jacalin lectin family protein
264889_AT	AT1G23050	hydroxyproline-rich glycoprotein family protein
264580_AT	AT1G05340	expressed protein
264016_AT	AT2G21220	auxin-responsive protein, putative
263970_AT	AT2G42850	cytochrome P450 family protein
263812_AT	AT2G09960	expressed protein
263708_AT	AT1G09320	agenet domain-containing protein
263675_X_AT	AT2G04770	CACTA-like transposase family (Ptta/En/Spm)
263614_AT	AT2G25240	serpin, putative / serine protease inhibitor, putative
263312_AT	AT2G10460	hypothetical protein
263231_AT	AT1G05680	UDP-glucoronosyl/UDP-glucosyl transferase family protein
263061_AT	AT2G18190	AAA-type ATPase family protein
262393_AT	AT1G49490	leucine-rich repeat family protein / extensin family protein
262259_S_AT	AT1G53870	expressed protein
262006_AT	AT1G64570	expressed protein
261964_AT	AT1G36600	copia-like retrotransposon family
261866_AT	AT1G50420	scarecrow-like transcription factor 3 (SCL3)
261768_AT	AT1G15550	gibberellin 3-beta-dioxygenase / gibberellin 3 beta-hydroxylase (GA4)
261619_X_AT	AT1G33130	CACTA-like transposase family (Ptta/En/Spm)
261571_AT	AT1G01150	expressed protein
261277_AT	AT1G20230	pentatricopeptide (PPR) repeat-containing protein
261215_AT	AT1G32970	subtilase family protein
261037_AT	AT1G17420	lipoxygenase, putative
261001_AT	AT1G26530	expressed protein
260741_AT	AT1G15045	hypothetical protein contains Pfam profile: PF00117 Glutamine amidotransferase class-I
260668_AT	AT1G19530	expressed protein
260475_AT	AT1G11080	serine carboxypeptidase S10 family protein
260433_AT	AT1G68170	nodulin MtN21 family protein
259793_AT	AT1G64380	AP2 domain-containing transcription factor, putative
259266_AT	AT3G01240	expressed protein
258983_AT	AT3G08860	alanine--glyoxylate aminotransferase, putative / beta-alanine-pyruvate aminotransferase, putative / AGT, putative
258787_AT	AT3G11840	U-box domain-containing protein
258290_AT	AT3G23460	cyclopropane fatty acid synthase-related
257947_AT	AT3G21720	isocitrate lyase, putative
257804_AT	AT3G18810	protein kinase family protein
257467_AT	AT1G31320	LOB domain protein 4 / lateral organ boundaries domain protein 4 (LBD4)
257337_AT	NAD5.2	NADH dehydrogenase subunit 5 (nad5) (trans-splicing part 2 of 2)
257323_AT	ORF294	hypothetical protein
257068_AT	AT3G28160	copia-like retrotransposon family
257057_AT	AT3G15310	expressed protein
256833_AT	AT3G22910	calcium-transporting ATPase, plasma membrane-type, putative / Ca(2+)-ATPase, putative (ACA13)
256748_X_AT	AT3G30396	CACTA-like transposase family (Ptta/En/Spm)
256685_AT	AT3G32100	hypothetical protein
256576_AT	AT3G28210	zinc finger (AN1-like) family protein
256506_AT	AT1G75160	expressed protein
256300_AT	AT1G69490	no apical meristem (NAM) family protein
255347_AT	AT4G03810	copia-like retrotransposon family
255160_AT	AT4G07820	pathogenesis-related protein, putative
255143_AT	AT4G08430	Ulp1 protease family protein
254833_S_AT	AT4G12280	copper amine oxidase family protein
254657_S_AT	AT4G18210	purine permease family protein
254591_AT	AT4G18870	heat shock transcription factor family protein
254390_AT	AT4G21940	calcium-dependent protein kinase, putative / CDPK, putative
254271_AT	AT4G23150	protein kinase family protein
254255_AT	AT4G23220	protein kinase family protein
254184_AT	AT4G23970	hypothetical protein
253910_AT	AT4G27290	S-locus protein kinase, putative
253894_AT	AT4G27150	2S seed storage protein 2 / 2S albumin storage protein / NWMU2-2S albumin 2
253870_AT	AT4G27530	expressed protein
253378_AT	AT4G33310	expressed protein
253085_S_AT	AT4G36270	ATP-binding region, ATPase-like domain-containing protein
253048_AT	AT4G37560	formamidase, putative / formamide amidohydrolase, putative
252629_AT	AT3G44970	cytochrome P450 family protein
252579_AT	AT3G45510	zinc finger (C3HC4-type RING finger) family protein
252435_AT	AT3G47320	hypothetical protein
252340_AT	AT3G48920	myb family transcription factor (MYB45)
252300_AT	AT3G49160	pyruvate kinase family protein
251677_AT	AT3G56980	basic helix-loop-helix (bHLH) family protein
250855_AT	AT5G04730	expressed protein
250732_AT	AT5G06480	MD-2-related lipid recognition domain-containing protein / ML domain-containing protein
250499_AT	AT5G09730	glycosyl hydrolase family 3 protein
250487_AT	AT5G09690	magnesium transporter CorA-like family protein (MRS2-7)
250292_AT	AT5G13220	expressed protein
250165_AT	AT5G15290	integral membrane family protein
250142_AT	AT5G14650	polygalacturonase, putative / pectinase, putative
249890_AT	AT5G22570	WRKY family transcription factor
249773_AT	AT5G24140	squalene monooxygenase 2 / squalene epoxidase 2 (SQP2)
249669_AT	AT5G35880	hypothetical protein
249667_AT	AT5G35850	unknown protein
249259_AT	AT5G41660	hypothetical protein
249206_AT	AT5G42630	myb family transcription factor (KAN4)
249104_AT	AT5G43610	sucrose transporter-related / sucrose-proton symporter-related
249013_AT	AT5G44700	leucine-rich repeat transmembrane protein kinase, putative
248777_AT	AT5G47920	expressed protein
248759_AT	AT5G47610	zinc finger (C3HC4-type RING finger) family protein
248617_AT	AT5G49590	hypothetical protein
248371_AT	AT5G51810	gibberellin 20-oxidase, putative
248327_AT	AT5G52750	heavy-metal-associated domain-containing protein
248246_AT	AT5G53200	myb family transcription factor (TRIPTYCHON)
248011_AT	AT5G56300	S-adenosyl-L-methionine
247582_AT	AT5G60760	2-phosphoglycerate kinase-related
247228_AT	AT5G65140	trehalose-6-phosphate phosphatase, putative
247061_AT	AT5G66780	expressed protein
246948_AT	AT5G25130	cytochrome P450 family protein
246666_AT	AT5G34830	expressed protein
246643_S_AT	AT5G34990	pseudogene, Ulp1 protease family
246625_AT	AT1G48880	hypothetical protein
246293_AT	AT3G56710	sigA-binding protein
245753_AT	AT1G35143	hypothetical protein
245709_AT	AT5G04320	expressed protein
245226_AT	AT3G29970	germination protein-related
245220_AT	AT1G59171	hypothetical protein
244953_S_AT	NAD6	NADH dehydrogenase subunit 6

## Sheet: ACC responses
regulated all ACC
Affy ID	AGI	Description
267598_AT	AT2G33010	ubiquitin-associated (UBA)/TS-N domain-containing protein
267591_AT	AT2G39705	expressed protein
267391_AT	AT2G44480	glycosyl hydrolase family 1 protein
267337_AT	AT2G39980	transferase family protein
267325_AT	AT2G19370	unknown protein predicted by genscan and genefinder
267286_AT	AT2G23640	reticulon family protein (RTNLB13)
267230_AT	AT2G44080	expressed protein
267207_AT	AT2G30840	2-oxoglutarate-dependent dioxygenase, putative
267149_S_AT	AT2G23500	Mutator-like transposase family
267139_S_AT	AT2G38220	expressed protein
267124_AT	AT2G23570	hydrolase, alpha/beta fold family protein
267075_AT	AT2G41070	basic leucine zipper transcription factor (BZIP12)
267008_AT	AT2G39350	ABC transporter family protein
266983_AT	AT2G39400	hydrolase, alpha/beta fold family protein
266962_AT	AT2G39440	expressed protein
266877_AT	AT2G44570	glycosyl hydrolase family 9 protein
266837_X_AT	AT2G25990	hypothetical protein
266800_AT	AT2G22880	VQ motif-containing protein
266778_AT	AT2G29090	cytochrome P450 family protein
266761_AT	AT2G47130	short-chain dehydrogenase/reductase (SDR) family protein
266730_AT	AT2G03110	KH domain-containing protein
266469_AT	AT2G31180	myb family transcription factor (MYB14)
266465_AT	AT2G47750	auxin-responsive GH3 family protein
266364_AT	AT2G41230	expressed protein
266267_AT	AT2G29460	glutathione S-transferase, putative
266148_X_AT	AT2G12240	CACTA-like transposase family (Ptta/En/Spm)
266066_AT	AT2G18800	xyloglucan
266027_AT	AT2G05820	CACTA-like transposase family (Tnp2/En/Spm)
266011_AT	AT2G37440	endonuclease/exonuclease/phosphatase family protein
265948_AT	AT2G19590	1-aminocyclopropane-1-carboxylate oxidase, putative / ACC oxidase, putative
265881_AT	AT2G42480	meprin and TRAF homology domain-containing protein / MATH domain-containing protein
265763_AT	AT2G48040	expressed protein
265757_X_AT	AT2G13160	CACTA-like transposase family (Ptta/En/Spm)
265754_X_AT	AT2G10640	CACTA-like transposase family (Ptta/En/Spm)
265553_AT	AT2G07550	copia-like retrotransposon family
265536_AT	AT2G15880	leucine-rich repeat family protein / extensin family protein
265490_S_AT	AT2G15470	glycoside hydrolase family 28 protein / polygalacturonase (pectinase) family protein
265409_AT	AT2G16830	pseudogene, hypothetical protein
265379_AT	AT2G18340	late embryogenesis abundant domain-containing protein / LEA domain-containing protein
265305_AT	AT2G20340	tyrosine decarboxylase, putative
265261_AT	AT2G42990	GDSL-motif lipase/hydrolase family protein
265213_AT	AT1G05020	epsin N-terminal homology (ENTH) domain-containing protein / clathrin assembly protein-related
265170_AT	AT1G23730	carbonic anhydrase, putative / carbonate dehydratase, putative
265081_AT	AT1G03840	zinc finger (C2H2 type) family protein
264931_AT	AT1G60590	polygalacturonase, putative / pectinase, putative
264906_AT	AT2G17270	mitochondrial substrate carrier family protein
264889_AT	AT1G23050	hydroxyproline-rich glycoprotein family protein
264788_AT	AT2G17880	DNAJ heat shock protein, putative
264765_AT	AT1G61430	S-locus protein kinase, putative
264586_AT	AT1G05160	ent-kaurenoic acid hydroxylase (KAO1) / cytochrome P450 88A3, putative (CYP88A3)
264525_AT	AT1G10060	branched-chain amino acid aminotransferase 1 / branched-chain amino acid transaminase 1 (BCAT1)
264426_AT	AT1G61760	harpin-induced protein-related / HIN1-related / harpin-responsive protein-related
264354_S_AT	AT1G03240	hypothetical protein
264275_AT	AT1G60350	no apical meristem (NAM) protein-related
264182_AT	AT1G65360	MADS-box protein (AGL23)
263970_AT	AT2G42850	cytochrome P450 family protein
263947_AT	AT2G35820	expressed protein
263812_AT	AT2G09960	expressed protein
263708_AT	AT1G09320	agenet domain-containing protein
263675_X_AT	AT2G04770	CACTA-like transposase family (Ptta/En/Spm)
263653_AT	AT1G04310	ethylene receptor-related
263402_AT	AT2G04050	MATE efflux family protein
263357_S_AT	AT2G15150	Mutator-like transposase family
263318_AT	AT2G24762	expressed protein
263313_AT	AT2G10450	14-3-3 protein, putative / grf15, putative
263245_AT	AT2G31470	F-box family protein
263210_AT	AT1G10585	expressed protein
263191_AT	AT1G36120	gypsy-like retrotransposon family
263169_AT	AT1G03010	phototropic-responsive NPH3 family protein
263133_AT	AT1G78450	SOUL heme-binding family protein
263096_AT	AT2G16060	non-symbiotic hemoglobin 1 (HB1) (GLB1)
263061_AT	AT2G18190	AAA-type ATPase family protein
263052_AT	AT2G13430	hypothetical protein
262894_AT	AT1G59780	disease resistance protein (CC-NBS-LRR class), putative
262893_AT	AT1G59790	cullin-related
262866_AT	AT1G64940	cytochrome P450, putative
262692_AT	AT1G62760	invertase/pectin methylesterase inhibitor family protein
262525_AT	AT1G17060	cytochrome P450, putative
262454_AT	AT1G11190	bifunctional nuclease (BFN1)
262390_AT	AT1G49260	hypothetical protein
262325_AT	AT1G64160	disease resistance-responsive family protein / dirigent family protein
262259_S_AT	AT1G53870	expressed protein
262144_AT	AT1G52620	pentatricopeptide (PPR) repeat-containing protein
262097_AT	AT1G55990	glycine-rich protein
262030_S_AT	AT1G37170	Mutator-like transposase family
262006_AT	AT1G64570	expressed protein
262001_AT	AT1G33790	jacalin lectin family protein
261980_AT	AT1G33820	hypothetical protein
261965_AT	AT1G36560	gypsy-like retrotransposon family (Athila)
261921_AT	AT1G65900	expressed protein
261772_AT	AT1G76240	expressed protein
261691_AT	AT1G50060	pathogenesis-related protein, putative
261648_AT	AT1G27730	zinc finger (C2H2 type) family protein (ZAT10) / salt-tolerance zinc finger protein (STZ)
261647_AT	AT1G27740	basic helix-loop-helix (bHLH) family protein
261636_AT	AT1G50110	branched-chain amino acid aminotransferase 6 / branched-chain amino acid transaminase 6 (BCAT6)
261619_X_AT	AT1G33130	CACTA-like transposase family (Ptta/En/Spm)
261606_AT	AT1G49570	peroxidase, putative
261571_AT	AT1G01150	expressed protein
261497_X_AT	AT1G28460	MADS-box family protein
261470_AT	AT1G28370	ERF domain protein 11 (ERF11)
261407_AT	AT1G18810	phytochrome kinase substrate-related
261292_AT	AT1G36940	hypothetical protein
261186_AT	AT1G34530	CACTA-like transposase family (Ptta/En/Spm)
260957_AT	AT1G06080	delta 9 desaturase (ADS1)
260783_AT	AT1G06160	ethylene-responsive factor, putative
260741_AT	AT1G15045	hypothetical protein contains Pfam profile: PF00117 Glutamine amidotransferase class-I
260668_AT	AT1G19530	expressed protein
260527_AT	AT2G47270	expressed protein
260241_AT	AT1G63710	cytochrome P450, putative
260220_AT	AT1G74650	myb family transcription factor (cY13)
260018_AT	AT1G41820	hypothetical protein
259982_AT	AT1G76410	zinc finger (C3HC4-type RING finger) family protein
259977_AT	AT1G76590	zinc-binding family protein
259951_AT	AT1G71490	pentatricopeptide (PPR) repeat-containing protein
259787_AT	AT1G29460	auxin-responsive protein, putative
259786_AT	AT1G29660	GDSL-motif lipase/hydrolase family protein
259705_AT	AT1G77450	no apical meristem (NAM) family protein
259596_AT	AT1G28130	auxin-responsive GH3 family protein
259589_AT	AT1G28135	expressed protein
259574_AT	AT1G35310	Bet v I allergen family protein
259558_AT	AT1G21230	wall-associated kinase, putative
259552_AT	AT1G21320	VQ motif-containing protein
259331_AT	AT3G03840	auxin-responsive protein, putative
259297_AT	AT3G05360	disease resistance family protein / LRR family protein
259271_AT	AT3G01170	expressed protein
259143_AT	AT3G10190	calmodulin, putative
259042_AT	AT3G03450	gibberellin response modulator, putative / gibberellin-responsive modulator, putative
258975_AT	AT3G01970	WRKY family transcription factor
258581_AT	AT3G04160	expressed protein
258337_AT	AT3G16040	expressed protein
258290_AT	AT3G23460	cyclopropane fatty acid synthase-related
258241_AT	AT3G27650	LOB domain protein 25 / lateral organ boundaries domain protein 25 (LBD25)
258237_AT	AT3G27810	myb family transcription factor (MYB3) (MYB21)
258178_AT	AT3G21680	expressed protein
258003_AT	AT3G29030	expansin, putative (EXP5)
257994_AT	AT3G19920	expressed protein
257961_AT	AT3G19780	expressed protein
257927_AT	AT3G23240	ethylene-responsive factor 1 / ethylene response factor 1 (ERF1)
257922_AT	AT3G23150	ethylene receptor, putative (ETR2)
257793_AT	AT3G26960	expressed protein
257682_AT	AT3G13240	hypothetical protein
257643_AT	AT3G25730	AP2 domain-containing transcription factor, putative
257636_AT	AT3G26200	cytochrome P450 71B22, putative (CYP71B22)
257581_S_AT	AT1G50680	AP2 domain-containing transcription factor, putative
257467_AT	AT1G31320	LOB domain protein 4 / lateral organ boundaries domain protein 4 (LBD4)
257441_AT	AT2G04020	GDSL-motif lipase/hydrolase family protein
257373_AT	AT2G43140	basic helix-loop-helix (bHLH) family protein
257142_AT	AT3G20090	cytochrome P450 family protein
257113_AT	AT3G20130	cytochrome P450 family protein
256685_AT	AT3G32100	hypothetical protein
256589_AT	AT3G28740	cytochrome P450 family protein
256560_S_AT	AT3G31415	terpene synthase/cyclase family protein
256506_AT	AT1G75160	expressed protein
256356_S_AT	AT1G66500	zinc finger (C2H2-type) family protein
256335_AT	AT1G72110	expressed protein
256137_AT	AT1G48690	auxin-responsive GH3 family protein
256053_AT	AT1G07260	UDP-glucoronosyl/UDP-glucosyl transferase family protein
255944_AT	AT5G28600	hypothetical protein
255935_AT	AT1G12700	helicase domain-containing protein / pentatricopeptide (PPR) repeat-containing protein
255900_AT	AT1G17830	expressed protein
255822_AT	AT2G40610	expansin, putative (EXP8)
255753_AT	AT1G18570	myb family transcription factor (MYB51)
255609_S_AT	AT4G01180	XH/XS domain-containing protein
255549_AT	AT4G01950	phospholipid/glycerol acyltransferase family protein
255546_AT	AT4G01910	DC1 domain-containing protein
255438_AT	AT4G03070	2-oxoglutarate-dependent dioxygenase (AOP1.2)
255374_AT	AT4G03770	gypsy-like retrotransposon family
255347_AT	AT4G03810	copia-like retrotransposon family
255298_AT	AT4G04840	methionine sulfoxide reductase domain-containing protein / SeIR domain-containing protein
255122_AT	AT4G08490	gypsy-like retrotransposon family (Athila)
254909_AT	AT4G11210	disease resistance-responsive family protein / dirigent family protein
254889_AT	AT4G11650	osmotin-like protein (OSM34)
254738_AT	AT4G13860	glycine-rich RNA-binding protein, putative
254646_AT	AT4G18530	expressed protein
254556_AT	AT4G19220	pentatricopeptide (PPR) repeat-containing protein
254371_AT	AT4G21760	glycosyl hydrolase family 1 protein
254095_AT	AT4G25140	glycine-rich protein / oleosin
254093_AT	AT4G25110	latex-abundant family protein (AMC2) / caspase family protein
254071_AT	AT4G25510	hypothetical protein
254056_AT	AT4G25250	invertase/pectin methylesterase inhibitor family protein
253985_AT	AT4G26220	caffeoyl-CoA 3-O-methyltransferase, putative
253845_AT	AT4G27980	expressed protein
253829_AT	AT4G28040	nodulin MtN21 family protein
253767_AT	AT4G28520	12S seed storage protein, putative / cruciferin, putative
253736_AT	AT4G28780	GDSL-motif lipase/hydrolase family protein
253678_AT	AT4G29600	cytidine deaminase, putative / cytidine aminohydrolase, putative
253378_AT	AT4G33310	expressed protein
252988_AT	AT4G38410	dehydrin, putative
252950_AT	AT4G38690	1-phosphatidylinositol phosphodiesterase-related
252907_AT	AT4G39650	gamma-glutamyltranspeptidase family protein
252882_AT	AT4G39675	expressed protein
252809_AT	AT3G42430	hypothetical protein
252775_S_AT	AT3G42930	CACTA-like transposase family (Ptta/En/Spm)
252736_AT	AT3G43210	kinesin motor family protein (NACK2)
252598_AT	AT3G45380	hypothetical protein
252597_AT	AT3G45360	hypothetical protein
252579_AT	AT3G45510	zinc finger (C3HC4-type RING finger) family protein
252532_AT	AT3G46570	glycosyl hydrolase family 17 protein
252510_AT	AT3G46270	receptor protein kinase-related
252435_AT	AT3G47320	hypothetical protein
252286_AT	AT3G49070	expressed protein
252160_AT	AT3G50570	hydroxyproline-rich glycoprotein family protein
252103_AT	AT3G51410	expressed protein
251977_AT	AT3G53250	auxin-responsive family protein
251933_AT	AT3G54060	hypothetical protein
251771_AT	AT3G56000	glycosyl transferase family 2 protein
251739_AT	AT3G56170	Ca(2+)-dependent nuclease
251698_AT	AT3G56610	expressed protein
251436_AT	AT3G59900	expressed protein
251423_AT	AT3G60550	cyclin family protein
251363_AT	AT3G61250	myb family transcription factor (MYB17)
251144_AT	AT5G01210	transferase family protein
251045_S_AT	AT5G02360	DC1 domain-containing protein
251028_AT	AT5G02230	haloacid dehalogenase-like hydrolase family protein
250868_AT	AT5G03860	malate synthase, putative
250724_AT	AT5G06330	hairpin-responsive protein, putative (HIN1)
250680_AT	AT5G06570	expressed protein
250662_AT	AT5G07010	sulfotransferase family protein
250636_AT	AT5G07520	glycine-rich protein (GRP18)
250487_AT	AT5G09690	magnesium transporter CorA-like family protein (MRS2-7)
250287_AT	AT5G13330	AP2 domain-containing transcription factor family protein
250271_AT	AT5G12990	CLE40, putative
250099_AT	AT5G17300	myb family transcription factor
250070_AT	AT5G17980	C2 domain-containing protein
250012_X_AT	AT5G18060	auxin-responsive protein, putative
249983_AT	AT5G18470	curculin-like (mannose-binding) lectin family protein
249961_AT	AT5G18770	F-box family protein
249947_AT	AT5G19200	short-chain dehydrogenase/reductase (SDR) family protein
249902_AT	AT5G22680	hypothetical protein
249895_AT	AT5G22500	acyl CoA reductase, putative / male-sterility protein, putative
249780_AT	AT5G24240	phosphatidylinositol 3- and 4-kinase family protein / ubiquitin family protein
249770_AT	AT5G24110	WRKY family transcription factor
249675_AT	AT5G35940	jacalin lectin family protein
249626_AT	AT5G37540	aspartyl protease family protein
249616_S_AT	AT5G37440	DNAJ heat shock N-terminal domain-containing protein
249517_AT	AT5G38580	hypothetical protein
249467_AT	AT5G39610	no apical meristem (NAM) family protein
249418_AT	AT5G39780	'putative protein predicted protein, Arabidopsis thaliana'
249364_AT	AT5G40590	DC1 domain-containing protein
249303_AT	AT5G41460	fringe-related protein
249263_AT	AT5G41730	protein kinase family protein
249205_AT	AT5G42600	pentacyclic triterpene synthase, putative
249203_AT	AT5G42590	cytochrome P450 71A16, putative (CYP71A16)
249202_AT	AT5G42580	cytochrome P450 family protein
249104_AT	AT5G43610	sucrose transporter-related / sucrose-proton symporter-related
249087_AT	AT5G44210	ERF domain protein 9 (ERF9)
249065_AT	AT5G44260	zinc finger (CCCH-type) family protein
248949_AT	AT5G45570	Ulp1 protease family protein
248921_AT	AT5G45950	GDSL-motif lipase/hydrolase family protein
248902_AT	AT5G46440	expressed protein
248888_AT	AT5G46240	inward rectifying potassium channel (KAT1)
248777_AT	AT5G47920	expressed protein
248725_AT	AT5G47980	transferase family protein
248617_AT	AT5G49590	hypothetical protein
248236_AT	AT5G53870	plastocyanin-like domain-containing protein
248230_AT	AT5G53830	VQ motif-containing protein
248208_AT	AT5G53980	homeobox-leucine zipper family protein
248205_AT	AT5G54300	expressed protein
248011_AT	AT5G56300	S-adenosyl-L-methionine
247878_AT	AT5G57760	expressed protein
247684_AT	AT5G59670	leucine-rich repeat protein kinase, putative
247639_S_AT	AT5G60500	undecaprenyl pyrophosphate synthetase family protein / UPP synthetase family protein
247474_AT	AT5G62280	expressed protein
247429_AT	AT5G62620	galactosyltransferase family protein
247293_AT	AT5G64510	expressed protein
247162_AT	AT5G65730	xyloglucan
247070_AT	AT5G66815	expressed protein
246967_AT	AT5G24860	expressed protein
246940_AT	AT5G25400	phosphate translocator-related
246903_AT	AT5G25750	hypothetical protein
246869_AT	AT5G26020	hypothetical protein
246842_AT	AT5G26731	expressed protein
246827_AT	AT5G26330	plastocyanin-like domain-containing protein / mavicyanin, putative
246666_AT	AT5G34830	expressed protein
246643_S_AT	AT5G34990	pseudogene, Ulp1 protease family
246495_AT	AT5G16200	50S ribosomal protein-related
246149_AT	AT5G19890	peroxidase, putative
246000_AT	AT5G20820	auxin-responsive protein-related
245970_AT	AT5G20710	beta-galactosidase, putative / lactase, putative
245928_S_AT	AT5G24780	vegetative storage protein 1 (VSP1)
245753_AT	AT1G35143	hypothetical protein
245734_AT	AT1G73480	hydrolase, alpha/beta fold family protein
245696_AT	AT5G04190	phytochrome kinase substrate-related
245689_AT	AT5G04120	phosphoglycerate/bisphosphoglycerate mutase family protein
245662_AT	AT1G28190	expressed protein
245338_AT	AT4G16442	integral membrane family protein
245304_AT	AT4G15630	integral membrane family protein
245277_AT	AT4G15550	UDP-glucose
245257_AT	AT4G14640	calmodulin-8 (CAM8)
245220_AT	AT1G59171	hypothetical protein
245192_AT	AT1G67780	hypothetical protein
245158_AT	AT2G33130	rapid alkalinization factor (RALF) family protein
245079_AT	AT2G23330	copia-like retrotransposon family
245038_AT	AT2G26560	patatin, putative
